# Supplementary material for: MMCT energy change in cyanidometal-bridged trinuclear complexes by changing the ligand electron donating ability
Source: Royal Society of Chemistry journal article supplement (doi:10.1039/d2nj06104j), 2023-01-01
Supplement: d2nj06104j1.pdf [file d2nj06104j1.pdf]

Supporting Information

State Key Laboratory of Structural Chemistry, Fujian Institute of Research on the Structure of Matter, Chinese Academy of Science, Fuzhou, Fujian 350002, P. R. China  
 School of Chemical Sciences, University of Chinese Academy of Sciences, Beijing, 100049, P.R. China  
 School of Chemistry and Materials, Fujian Normal University, Fuzhou, Fujian 350007, P. R. China  
 E-mail: tsheng@fjirsm.ac.cn

**Table S1.** Crystallographic data for **1<sup>2+</sup>** and **1<sup>4+</sup>**.

|                                    | <b>1<sup>2+</sup></b>                                                                                             | <b>1<sup>4+</sup>·C<sub>4</sub>H<sub>10</sub>O</b>                                                |
|------------------------------------|-------------------------------------------------------------------------------------------------------------------|---------------------------------------------------------------------------------------------------|
| Empirical formula                  | C <sub>97</sub> H <sub>103</sub> Cl <sub>2</sub> F <sub>12</sub> Fe <sub>2</sub> N <sub>6</sub> P <sub>6</sub> Ru | C <sub>96</sub> H <sub>101</sub> F <sub>24</sub> Fe <sub>2</sub> N <sub>6</sub> P <sub>8</sub> Ru |
| Color and Habit                    | Light red block                                                                                                   | Dark brown block                                                                                  |
| Crystal Size (mm)                  | 0.25 × 0.18 × 0.11                                                                                                | 0.240×0.150×0.130                                                                                 |
| Temperature(K)                     | 99.98(11)                                                                                                         | 100.00(10)                                                                                        |
| Crystal system                     | Monoclinic                                                                                                        | Triclinic                                                                                         |
| Space group                        | <i>P2<sub>1</sub></i>                                                                                             | <i>P<math>\bar{1}</math></i>                                                                      |
| a (Å)                              | 15.0314(2)                                                                                                        | 14.1182(2)                                                                                        |
| b (Å)                              | 17.2258(2)                                                                                                        | 14.2919(2)                                                                                        |
| c (Å)                              | 19.1841(3)                                                                                                        | 29.4846(3)                                                                                        |
| alpha (deg.)                       | 90                                                                                                                | 80.0220(10)                                                                                       |
| beta (deg.)                        | 106.952(2)                                                                                                        | 80.4080(10)                                                                                       |
| gamma (deg.)                       | 90                                                                                                                | 76.5650(10)                                                                                       |
| Volume (Å <sup>3</sup> )           | 4751.46(12)                                                                                                       | 5649.14(13)                                                                                       |
| Z                                  | 2                                                                                                                 | 2                                                                                                 |
| Formula weight                     | 2050.34                                                                                                           | 2255.35                                                                                           |
| Density(cal.) (Mg/m <sup>3</sup> ) | 1.433                                                                                                             | 1.326                                                                                             |
| <i>M</i> (mm <sup>-1</sup> )       | 3.903                                                                                                             | 3.302                                                                                             |
| F (000)                            | 2110.0                                                                                                            | 2302.0                                                                                            |
| Theta range (deg.)                 | 4.186 to 120.668                                                                                                  | 5.338 to 120.16                                                                                   |
| Reflections collected / unique     | 37687 / 15869<br>[R(int) = 0.0354]                                                                                | 63857 / 24880<br>[R(int) = 0.0473]                                                                |
| Index range                        | -19 ≤ h ≤ 19,<br>-22 ≤ k ≤ 14,<br>-24 ≤ l ≤ 24                                                                    | -17 ≤ h ≤ 18,<br>-17 ≤ k ≤ 18,<br>-38 ≤ l ≤ 35                                                    |
| Data/restraints/parameters (obs.)  | 15869/1/1143                                                                                                      | 24880/0/1242                                                                                      |
| Final R indices (obs.)             | R <sub>1</sub> = 0.0349,<br>wR <sub>2</sub> = 0.0837                                                              | R <sub>1</sub> = 0.0569,<br>wR <sub>2</sub> = 0.1631                                              |

|                 |                                                      |                                                      |
|-----------------|------------------------------------------------------|------------------------------------------------------|
| R indices (all) | R <sub>1</sub> = 0.0388,<br>wR <sub>2</sub> = 0.0855 | R <sub>1</sub> = 0.0668,<br>wR <sub>2</sub> = 0.1700 |
| Goodness-of-fit | 1.036                                                | 1.062                                                |

**Table S2.** Crystallographic data for **2<sup>2+</sup>** and **2<sup>4+</sup>**.

|                                    | <b>2<sup>2+</sup></b>                                                                                             | <b>2<sup>4+</sup>·0.5C<sub>4</sub>H<sub>10</sub>O</b>                                                               |
|------------------------------------|-------------------------------------------------------------------------------------------------------------------|---------------------------------------------------------------------------------------------------------------------|
| Empirical formula                  | C <sub>99</sub> H <sub>107</sub> Cl <sub>2</sub> F <sub>12</sub> Fe <sub>2</sub> N <sub>6</sub> P <sub>6</sub> Ru | C <sub>105</sub> H <sub>122</sub> Cl <sub>6</sub> F <sub>24</sub> Fe <sub>2</sub> N <sub>6</sub> OP <sub>8</sub> Ru |
| Color and Habit                    | Light red block                                                                                                   | Dark red block                                                                                                      |
| Crystal Size (mm)                  | 0.250×0.170×0.100                                                                                                 | 0.230×0.140×0.130                                                                                                   |
| Temperature(K)                     | 100.00(10)                                                                                                        | 99.97(10)                                                                                                           |
| Crystal system                     | Monoclinic                                                                                                        | Triclinic                                                                                                           |
| Space group                        | <i>P</i> 2 <sub>1</sub>                                                                                           | <i>P</i> $\bar{1}$                                                                                                  |
| a (Å)                              | 15.2693(2)                                                                                                        | 15.78350(10)                                                                                                        |
| b (Å)                              | 16.9532(2)                                                                                                        | 16.41900(10)                                                                                                        |
| c (Å)                              | 19.1955(3)                                                                                                        | 24.0034(2)                                                                                                          |
| alpha (deg.)                       | 90                                                                                                                | 74.0600(10)                                                                                                         |
| beta (deg.)                        | 106.015(2)                                                                                                        | 77.9060(10)                                                                                                         |
| gamma (deg.)                       | 90                                                                                                                | 76.9500(10)                                                                                                         |
| Volume (Å <sup>3</sup> )           | 4776.16(12)                                                                                                       | 5754.12(8)                                                                                                          |
| Z                                  | 2                                                                                                                 | 2                                                                                                                   |
| Formula weight                     | 2078.39                                                                                                           | 2613.31                                                                                                             |
| Density(cal.) (Mg/m <sup>3</sup> ) | 1.445                                                                                                             | 1.508                                                                                                               |
| <i>M</i> (mm <sup>-1</sup> )       | 3.888                                                                                                             | 4.135                                                                                                               |
| F (000)                            | 2142.0                                                                                                            | 2672.0                                                                                                              |
| Theta range (deg.)                 | 4.164 to 120.348                                                                                                  | 3.37 to 120.17                                                                                                      |
| Reflections collected / unique     | 39077 / 15784<br>[R(int) = 0.0480]                                                                                | 84120 / 25572<br>[R(int) = 0.0422]                                                                                  |
| Index range                        | -19≤h≤19,<br>-12≤k≤21,<br>-24≤l≤24                                                                                | -20≤h≤20,<br>-21≤k≤15,<br>-30≤l≤30                                                                                  |
| Data/restraints/parameters (obs.)  | 15784/1/1163                                                                                                      | 25572/0/1390                                                                                                        |
| Final R indices (obs.)             | R <sub>1</sub> = 0.0539,<br>wR <sub>2</sub> = 0.1368                                                              | R <sub>1</sub> = 0.0429,<br>wR <sub>2</sub> = 0.1091                                                                |
| R indices (all)                    | R <sub>1</sub> = 0.0608,<br>wR <sub>2</sub> = 0.1436                                                              | R <sub>1</sub> = 0.0476,<br>wR <sub>2</sub> = 0.1118                                                                |
| Goodness-of-fit                    | 1.029                                                                                                             | 1.028                                                                                                               |

**Table S3.** Crystallographic data for **3<sup>2+</sup>** and **3<sup>4+</sup>**.

|                                    | <b>3<sup>2+</sup></b>                                                                                              | <b>3<sup>4+</sup>·0.5C<sub>4</sub>H<sub>10</sub>O</b>                                              |
|------------------------------------|--------------------------------------------------------------------------------------------------------------------|----------------------------------------------------------------------------------------------------|
| Empirical formula                  | C <sub>103</sub> H <sub>116</sub> Cl <sub>2</sub> F <sub>12</sub> Fe <sub>2</sub> N <sub>6</sub> P <sub>6</sub> Ru | C <sub>102</sub> H <sub>114</sub> F <sub>24</sub> Fe <sub>2</sub> N <sub>6</sub> P <sub>8</sub> Ru |
| Color and Habit                    | Dark red block                                                                                                     | Dark brown block                                                                                   |
| Crystal Size (mm)                  | 0.25 × 0.14 × 0.12                                                                                                 | 0.15 × 0.15 × 0.13                                                                                 |
| Temperature(K)                     | 100.00(10)                                                                                                         | 99.99(10)                                                                                          |
| Crystal system                     | monoclinic                                                                                                         | monoclinic                                                                                         |
| Space group                        | <i>P2<sub>1</sub></i>                                                                                              | <i>P2<sub>1</sub>/n</i>                                                                            |
| a (Å)                              | 15.27300(10)                                                                                                       | 14.6751(3)                                                                                         |
| b (Å)                              | 17.47840(10)                                                                                                       | 28.0911(7)                                                                                         |
| c (Å)                              | 19.05300(10)                                                                                                       | 27.1789(5)                                                                                         |
| alpha (deg.)                       | 90                                                                                                                 | 90                                                                                                 |
| beta (deg.)                        | 105.5060(10)                                                                                                       | 101.114(2)                                                                                         |
| gamma (deg.)                       | 90                                                                                                                 | 90                                                                                                 |
| Volume (Å <sup>3</sup> )           | 4901.03(5)                                                                                                         | 10994.1(4)                                                                                         |
| Z                                  | 2                                                                                                                  | 4                                                                                                  |
| Formula weight                     | 2135.50                                                                                                            | 2340.52                                                                                            |
| Density(cal.) (Mg/m <sup>3</sup> ) | 1.447                                                                                                              | 1.414                                                                                              |
| <i>M</i> (mm <sup>-1</sup> )       | 3.798                                                                                                              | 3.407                                                                                              |
| F (000)                            | 2208.0                                                                                                             | 4800.0                                                                                             |
| Theta range (deg.)                 | 4.184 to 120.5                                                                                                     | 3.972 to 105.86                                                                                    |
| Reflections collected / unique     | 148502 / 22053<br>[R(int) = 0.0470]                                                                                | 71978 / 19186<br>[R(int) = 0.0625]                                                                 |
| Index range                        | -19 ≤ h ≤ 19,<br>-22 ≤ k ≤ 22,<br>-24 ≤ l ≤ 24                                                                     | -17 ≤ h ≤ 10,<br>-33 ≤ k ≤ 33,<br>-29 ≤ l ≤ 32                                                     |
| Data/restraints/parameters (obs.)  | 22053/1/1203                                                                                                       | 19186/24/1302                                                                                      |
| Final R indices (obs.)             | R <sub>1</sub> = 0.0524,<br>wR <sub>2</sub> = 0.1389                                                               | R <sub>1</sub> = 0.0926,<br>wR <sub>2</sub> = 0.2432                                               |
| R indices (all)                    | R <sub>1</sub> = 0.0562,<br>wR <sub>2</sub> = 0.1420                                                               | R <sub>1</sub> = 0.1184,<br>wR <sub>2</sub> = 0.2621                                               |
| Goodness-of-fit                    | 1.012                                                                                                              | 1.029                                                                                              |

**Table S4.** Crystallographic data for 4<sup>2+</sup> and 4<sup>4+</sup>.

|                   | <b>4<sup>2+</sup></b>                                                                              | <b>4<sup>4+</sup></b>                                                                              |
|-------------------|----------------------------------------------------------------------------------------------------|----------------------------------------------------------------------------------------------------|
| Empirical formula | C <sub>104</sub> H <sub>118</sub> F <sub>12</sub> Fe <sub>2</sub> N <sub>6</sub> P <sub>6</sub> Ru | C <sub>104</sub> H <sub>116</sub> F <sub>24</sub> Fe <sub>2</sub> N <sub>6</sub> P <sub>8</sub> Ru |
| Color and Habit   | Dark red block                                                                                     | Dark brown block                                                                                   |
| Crystal Size (mm) | 0.180×0.150×0.130                                                                                  | 0.150×0.140×0.120                                                                                  |

|                                    |                                                      |                                                      |
|------------------------------------|------------------------------------------------------|------------------------------------------------------|
| Temperature(K)                     | 99.99(10)                                            | 100.00(10)                                           |
| Crystal system                     | Monoclinic                                           | Triclinic                                            |
| Space group                        | $P2_1$                                               | $P\bar{1}$                                           |
| a (Å)                              | 16.2245(3)                                           | 13.04330(10)                                         |
| b (Å)                              | 17.8873(3)                                           | 15.3889(2)                                           |
| c (Å)                              | 19.2837(4)                                           | 32.7979(4)                                           |
| alpha (deg.)                       | 90                                                   | 94.4230(10)                                          |
| beta (deg.)                        | 109.935(2)                                           | 91.3690(10)                                          |
| gamma (deg.)                       | 90                                                   | 113.6670(10)                                         |
| Volume (Å <sup>3</sup> )           | 5261.03(18)                                          | 6000.76(12)                                          |
| Z                                  | 2                                                    | 2                                                    |
| Formula weight                     | 2078.63                                              | 2366.55                                              |
| Density(cal.) (Mg/m <sup>3</sup> ) | 1.312                                                | 1.310                                                |
| $M$ (mm <sup>-1</sup> )            | 3.224                                                | 3.124                                                |
| F (000)                            | 2156.0                                               | 2428.0                                               |
| Theta range (deg.)                 | 4.238 to 109.64                                      | 6.162 to 120.112                                     |
| Reflections collected / unique     | 32694 / 14260<br>[R(int) = 0.0511]                   | 83344 / 26508<br>[R(int) = 0.0575]                   |
| Index range                        | -19 ≤ h ≤ 19,<br>-21 ≤ k ≤ 10,<br>-23 ≤ l ≤ 23       | -16 ≤ h ≤ 15,<br>-19 ≤ k ≤ 19,<br>-42 ≤ l ≤ 42       |
| Data/restraints/parameters (obs.)  | 14260/703/1196                                       | 26508/0/1322                                         |
| Final R indices (obs.)             | R <sub>1</sub> = 0.0563,<br>wR <sub>2</sub> = 0.1451 | R <sub>1</sub> = 0.0534,<br>wR <sub>2</sub> = 0.1426 |
| R indices (all)                    | R <sub>1</sub> = 0.0588,<br>wR <sub>2</sub> = 0.1467 | R <sub>1</sub> = 0.0631,<br>wR <sub>2</sub> = 0.1482 |
| Goodness-of-fit                    | 1.103                                                | 1.063                                                |

**Table S5.** Crystallographic data for **5<sup>4+</sup>**.

|                   | <b>5<sup>4+</sup></b>                                                                              |
|-------------------|----------------------------------------------------------------------------------------------------|
| Empirical formula | C <sub>106</sub> H <sub>122</sub> F <sub>24</sub> Fe <sub>2</sub> N <sub>6</sub> P <sub>8</sub> Ru |
| Color and Habit   | Dark brown block                                                                                   |
| Crystal Size (mm) | 0.2 × 0.13 × 0.12                                                                                  |
| Temperature(K)    | 100.01(10)                                                                                         |
| Crystal system    | triclinic                                                                                          |
| Space group       | $P\bar{1}$                                                                                         |
| a (Å)             | 12.48220(10)                                                                                       |
| b (Å)             | 14.6612(3)                                                                                         |

|                                    |                                                      |
|------------------------------------|------------------------------------------------------|
| c (Å)                              | 17.9543(3)                                           |
| alpha (deg.)                       | 106.982(2)                                           |
| beta (deg.)                        | 101.5990(10)                                         |
| gamma (deg.)                       | 101.3990(10)                                         |
| Volume (Å <sup>3</sup> )           | 2960.78(9)                                           |
| Z                                  | 1                                                    |
| Formula weight                     | 2396.62                                              |
| Density(cal.) (Mg/m <sup>3</sup> ) | 1.344                                                |
| M (mm <sup>-1</sup> )              | 3.170                                                |
| F (000)                            | 1232.0                                               |
| Theta range (deg.)                 | 4.654 to 120.228                                     |
| Reflections collected / unique     | 35853 / 13050<br>[R(int) = 0.0336]                   |
| Index range                        | -16 ≤ h ≤ 13,<br>-18 ≤ k ≤ 18,<br>-23 ≤ l ≤ 23       |
| Data/restraints/parameters (obs.)  | 13050/0/673                                          |
| Final R indices (obs.)             | R <sub>1</sub> = 0.0409,<br>wR <sub>2</sub> = 0.1067 |
| R indices (all)                    | R <sub>1</sub> = 0.0468,<br>wR <sub>2</sub> = 0.1099 |
| Goodness-of-fit                    | 1.052                                                |

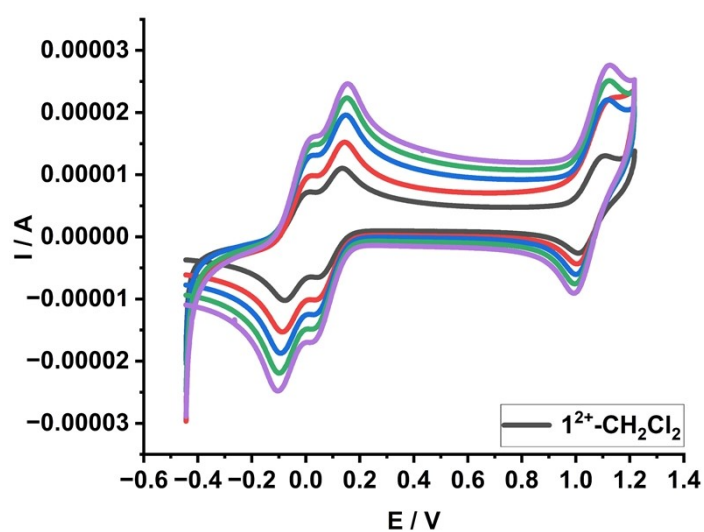

**Figure S1.** A cyclic voltammogram of  $1^{2+}$  recorded in  $\text{CH}_2\text{Cl}_2$  / 0.1 M [TBA] $\text{PF}_6$  at a  $n$ ( $n=100, 200, 300, 400, 500$ )  $\text{mV}\cdot\text{s}^{-1}$  scan rate.

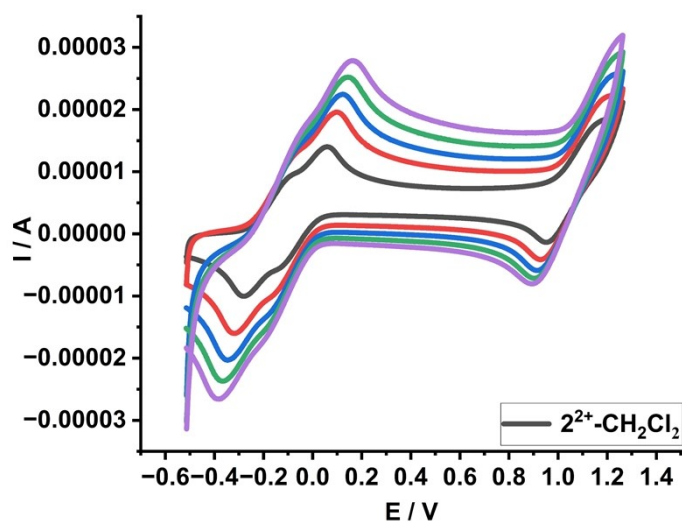

**Figure S2.** A cyclic voltammogram of  $2^{2+}$  recorded in  $\text{CH}_2\text{Cl}_2 / 0.1 \text{ M}$   $[\text{TBA}]\text{PF}_6$  at a  $n(n=100, 200, 300, 400, 500) \text{ mV}\cdot\text{s}^{-1}$  scan rate.

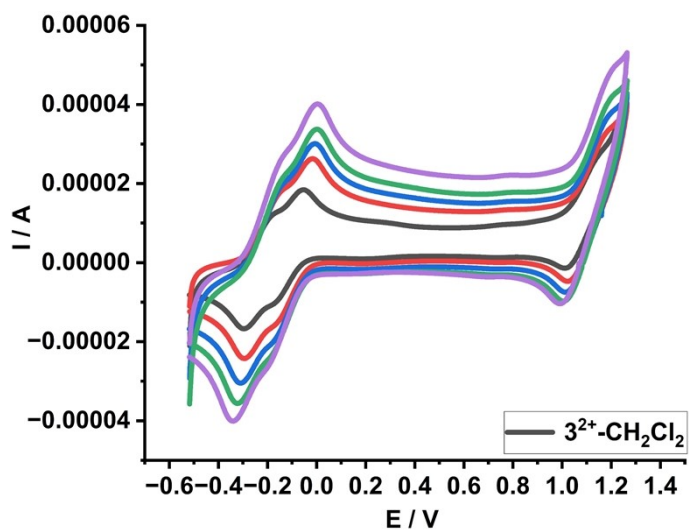

**Figure S3.** A cyclic voltammogram of  $3^{2+}$  recorded in  $\text{CH}_2\text{Cl}_2 / 0.1 \text{ M}$   $[\text{TBA}]\text{PF}_6$  at a  $n(n=100, 200, 300, 400, 500) \text{ mV}\cdot\text{s}^{-1}$  scan rate.

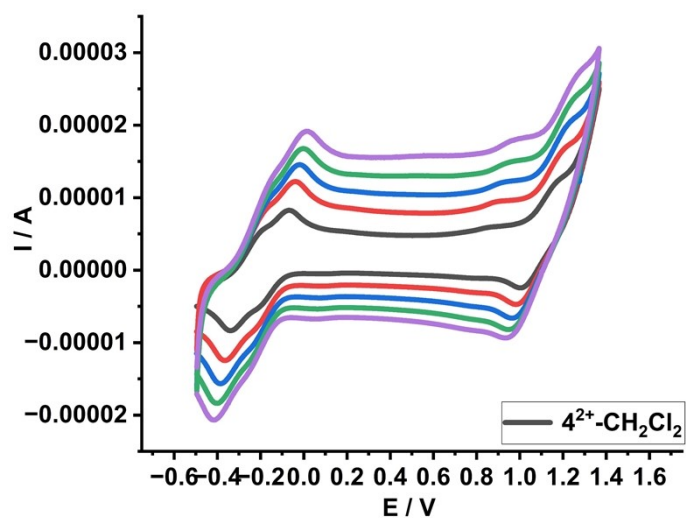

**Figure S4.** A cyclic voltammogram of  $4^{2+}$  recorded in  $\text{CH}_2\text{Cl}_2 / 0.1 \text{ M}$   $[\text{TBA}]\text{PF}_6$  at a  $n$  ( $n=100, 200, 300, 400, 500$ )  $\text{mV}\cdot\text{s}^{-1}$  scan rate.

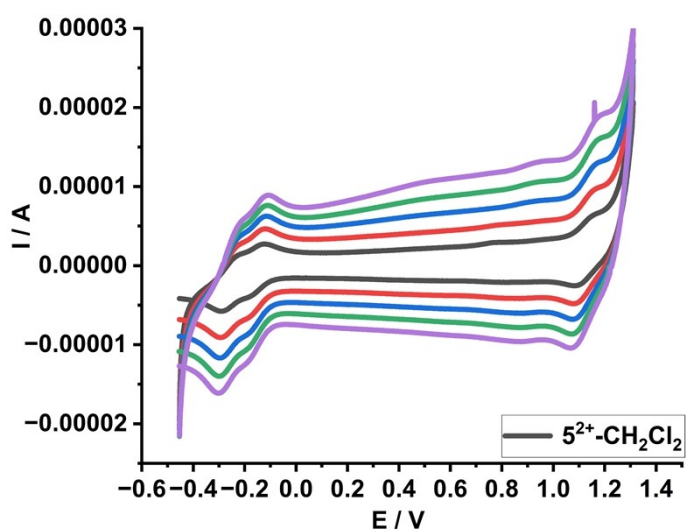

**Figure S5.** A cyclic voltammogram of  $5^{2+}$  recorded in  $\text{CH}_2\text{Cl}_2 / 0.1 \text{ M}$   $[\text{TBA}]\text{PF}_6$  at a  $n$  ( $n=100, 200, 300, 400, 500$ )  $\text{mV}\cdot\text{s}^{-1}$  scan rate.

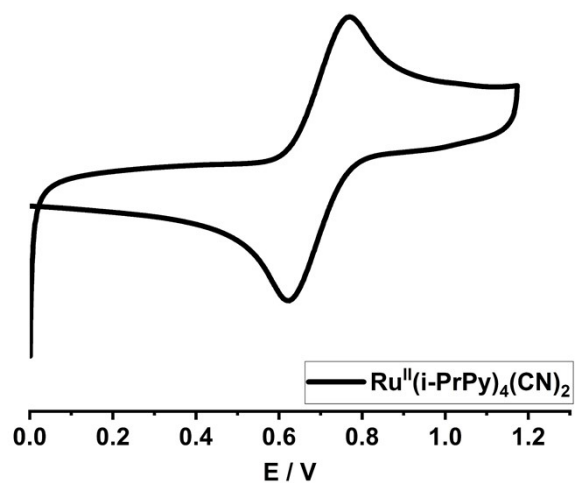

**Figure S6.** Cyclic voltammograms of  $\text{Ru}^{\text{II}}(\text{i-PrPy})_4(\text{CN})_2$  recorded in  $\text{CH}_2\text{Cl}_2 / 0.1 \text{ M } [\text{TBA}]\text{PF}_6$  at a  $100 \text{ mV s}^{-1}$  scan rate.

**Table S6.** Electrochemical data vs.  $\text{Ag}/\text{AgCl}$ .

|                                                           | $E_{1/2} / \text{V}$ |
|-----------------------------------------------------------|----------------------|
| $\text{CpFe}(\text{dppe})\text{CN}^{\text{I}}$            | 0.48                 |
| $\text{CpMeFe}(\text{dppe})\text{CN}^{\text{I}}$          | 0.44                 |
| $\text{CpMe}^3\text{Fe}(\text{dppe})\text{CN}^{\text{I}}$ | 0.34                 |
| $\text{CpMe}^4\text{Fe}(\text{dppe})\text{CN}^{\text{I}}$ | 0.30                 |
| $\text{CpMe}^5\text{Fe}(\text{dppe})\text{CN}^{\text{I}}$ | 0.25                 |
| $\text{Ru}^{\text{II}}(\text{i-PrPy})_4(\text{CN})_2$     | 0.69                 |

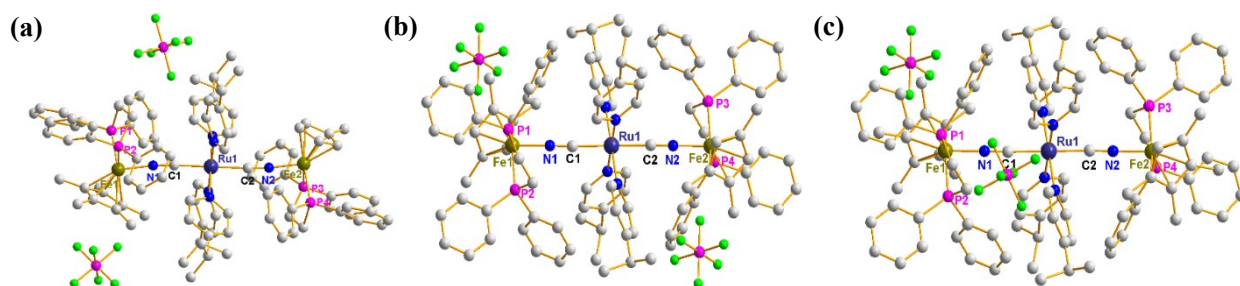

**Figure S7.** (a), (b), (c) Molecular structure of  $2^{2+}$ ,  $3^{2+}$ ,  $4^{2+}$ , respectively. Hydrogen atoms and solvent molecules have been omitted for clarity. Dark blue, Ru; yellow, Fe; pink, P; gray, C; blue, N; green, F.



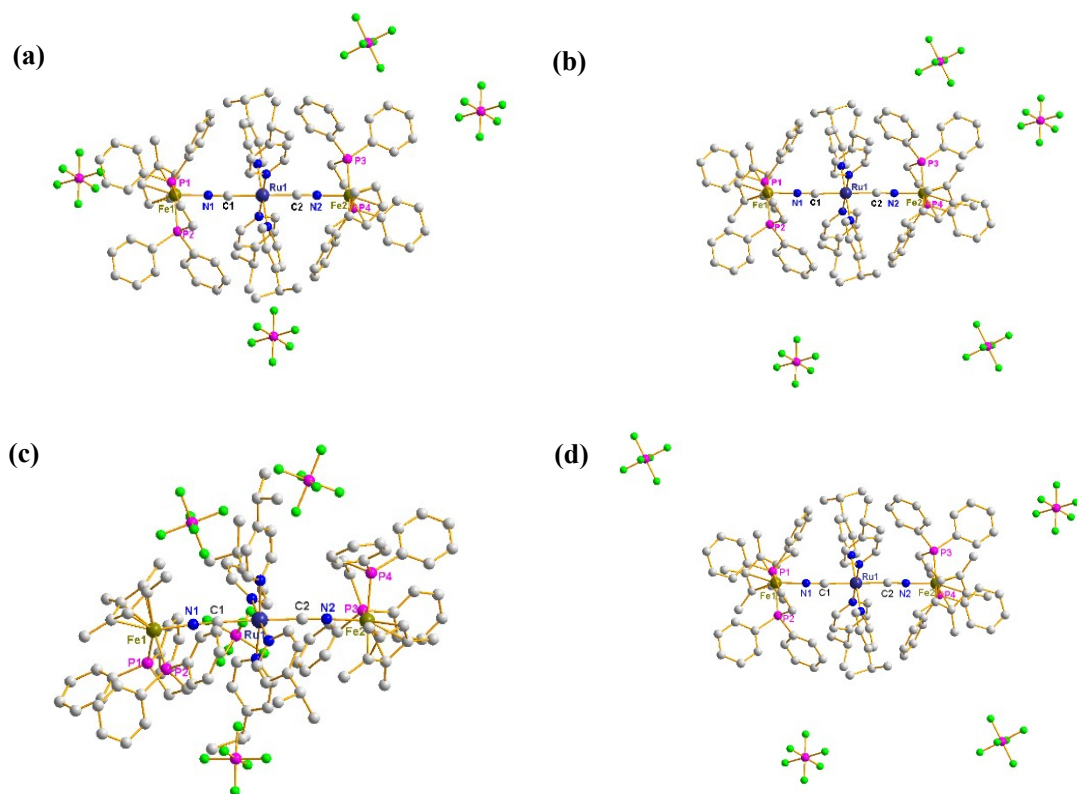

**Figure S8.** (a), (b), (c), (d) Molecular structure of  $2^{2+}$ ,  $3^{4+}$ ,  $4^{4+}$ ,  $5^{4+}$ , respectively. Hydrogen atoms and solvent molecules have been omitted for clarity. Dark blue, Ru; yellow, Fe; pink, P; gray, C; blue, N; green, F.

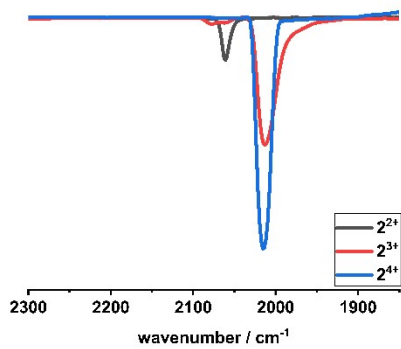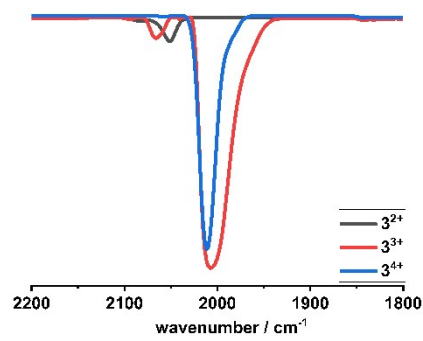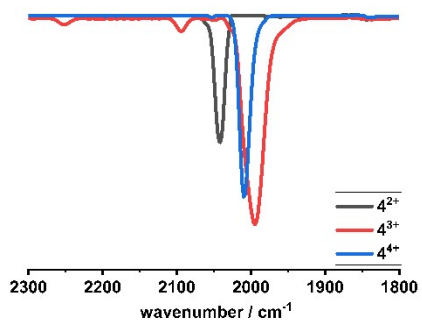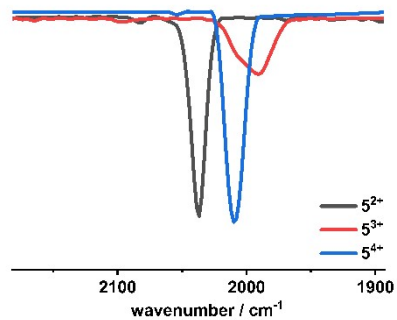

**Figure S9.** The  $\nu(\text{CN})$  bands in solid state.

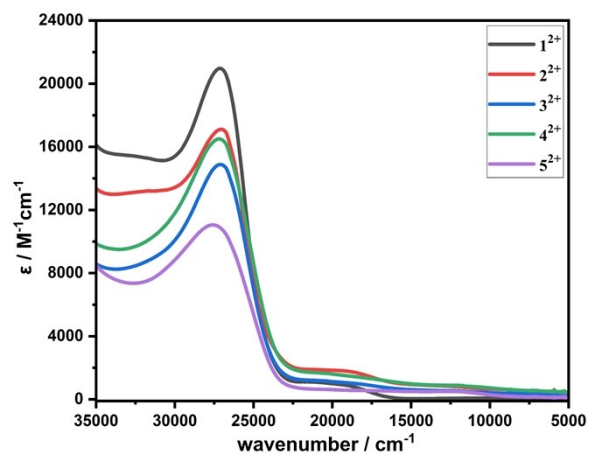

**Figure S10.** UV-vis-NIR spectra of the  $1^{2+}$ - $5^{2+}$  in  $\text{CH}_2\text{Cl}_2$ .

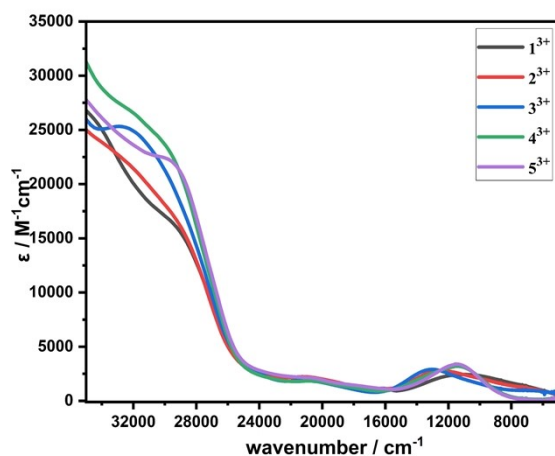

**Figure S11.** UV-vis-NIR spectra of the  $1^{3+}$ - $5^{3+}$  in  $\text{CH}_2\text{Cl}_2$ .

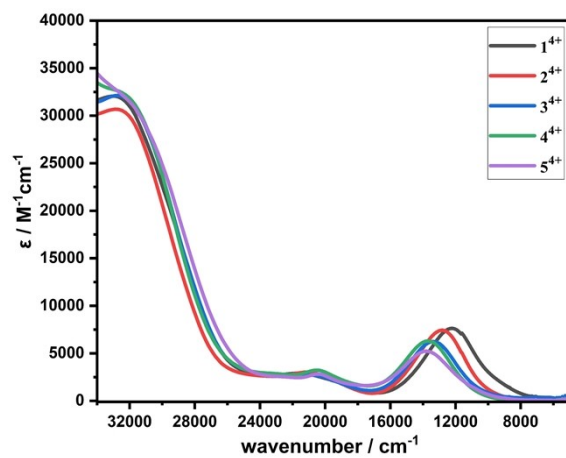

**Figure S12.** UV-vis-NIR spectra of the  $1^{4+}$ - $5^{4+}$  in  $\text{CH}_2\text{Cl}_2$ .

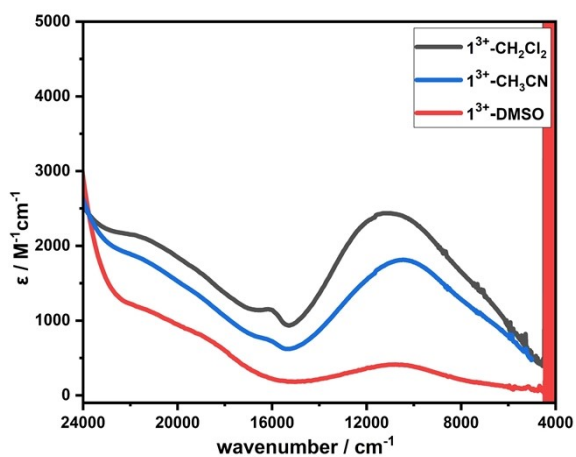

Figure S13. UV-vis-NIR spectra of  $1^{3+}$  in different solvents.

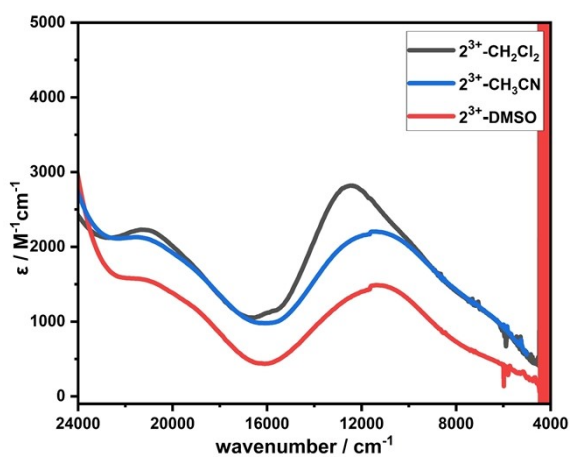

Figure S14. UV-vis-NIR spectra of  $2^{3+}$  in different solvents.

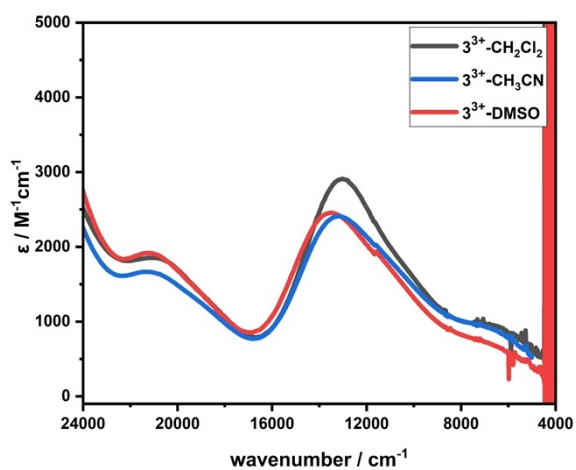

Figure S15. UV-vis-NIR spectra of  $3^{3+}$  in different solvents.

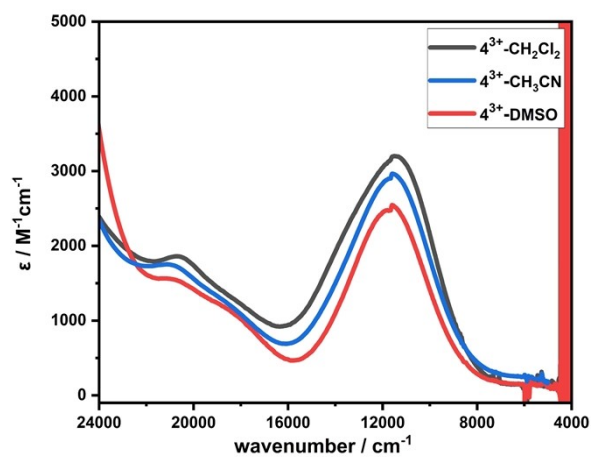

Figure S16. UV-vis-NIR spectra of  $4^{3+}$  in different solvents.

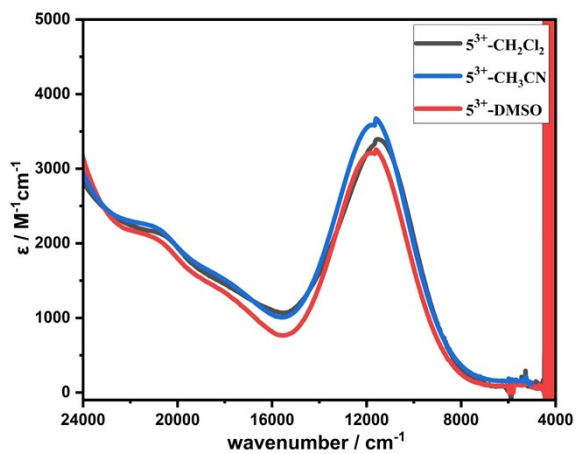

Figure S17. UV-vis-NIR spectra of  $5^{3+}$  in different solvents.

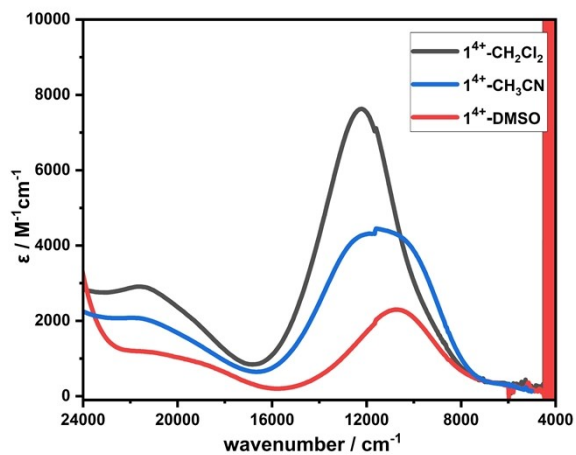

Figure S18. UV-vis-NIR spectra of  $1^{4+}$  in different solvents.

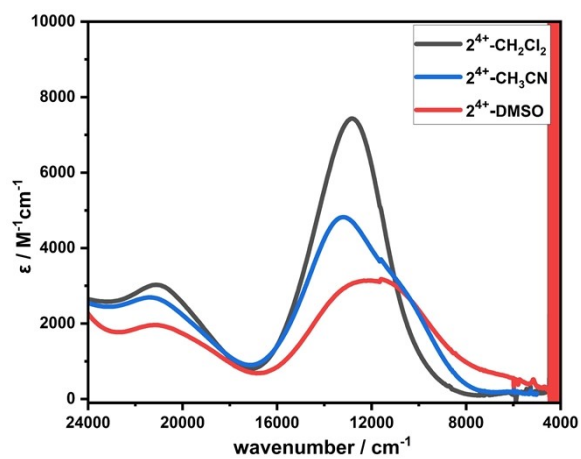

Figure S19. UV-vis-NIR spectra of  $2^{4+}$  in different solvents.

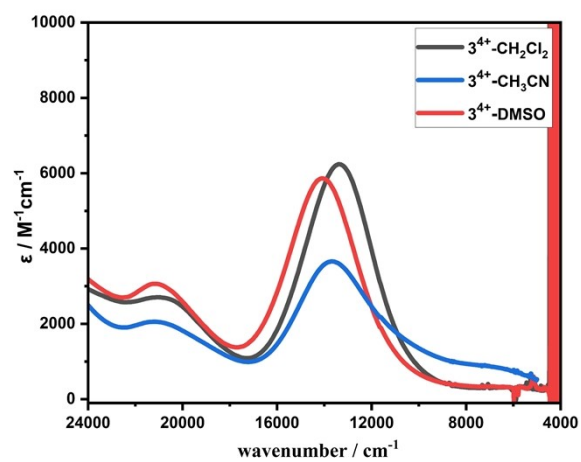

Figure S20. UV-vis-NIR spectra of  $3^{4+}$  in different solvents.

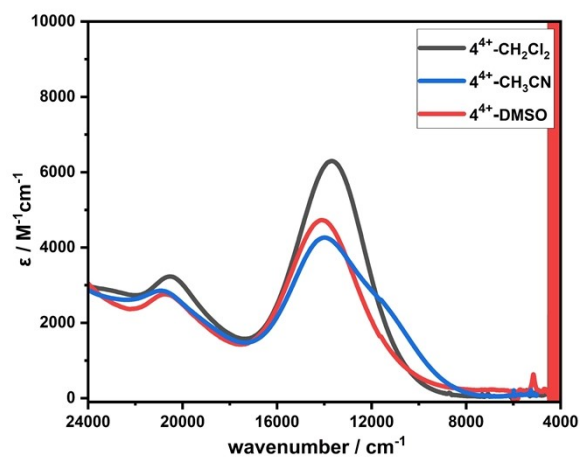

Figure S21. UV-vis-NIR spectra of  $4^{4+}$  in different solvents.

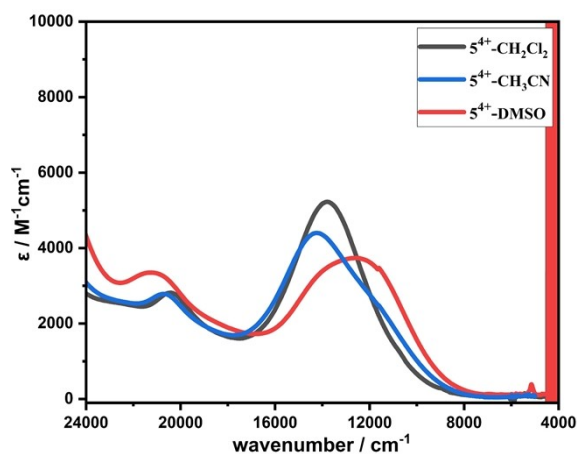

**Figure S22.** UV-vis-NIR spectra of  $5^{4+}$  in different solvents.

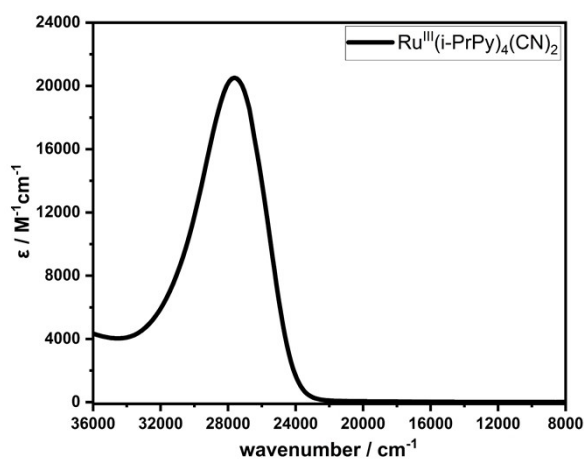

**Figure S23.** UV-vis-NIR spectra of  $\text{Ru}^{\text{III}}(\text{i-PrPy})_4(\text{CN})_2$  in  $\text{CH}_2\text{Cl}_2$ .

**Table S7.** Mulliken spin densities of the MV compounds.

|          | Ru       | Fe1      | Fe2      |
|----------|----------|----------|----------|
| $1^{3+}$ | 0.080415 | 0.006824 | 1.179786 |
| $2^{3+}$ | 0.059975 | 0.004731 | 1.260200 |
| $3^{3+}$ | 0.038135 | 0.004455 | 1.354057 |
| $4^{3+}$ | 0.030960 | 0.002665 | 1.368360 |
| $5^{3+}$ | 0.038744 | 0.007840 | 1.369491 |
| $1^{4+}$ | 0.048250 | 1.293172 | 1.296249 |
| $2^{4+}$ | 0.037271 | 1.297464 | 1.301171 |
| $3^{4+}$ | 0.027491 | 1.448378 | 1.448494 |
| $4^{4+}$ | 0.021001 | 1.441631 | 1.487646 |
| $5^{4+}$ | 0.013958 | 1.536410 | 1.511494 |

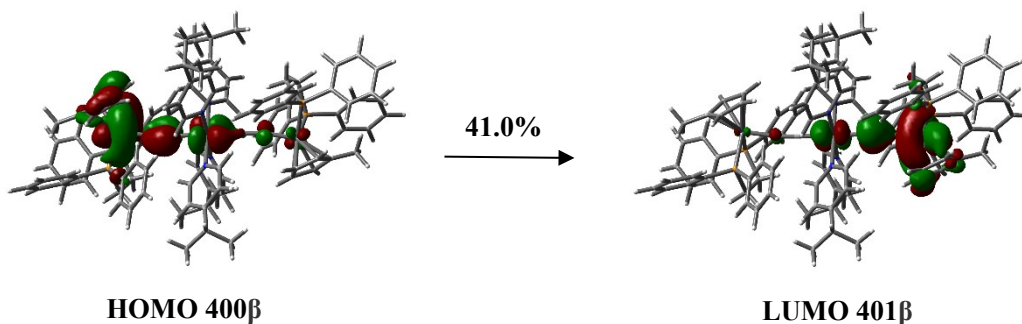

**Figure S24.** The major electronic transitions corresponding to the NIR band ( $\lambda = 921$  nm,  $f = 0.0528$ ) of  $2^{3+}$ .

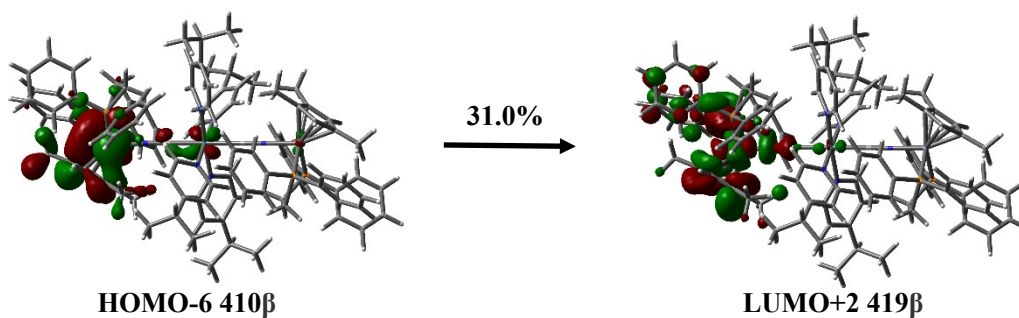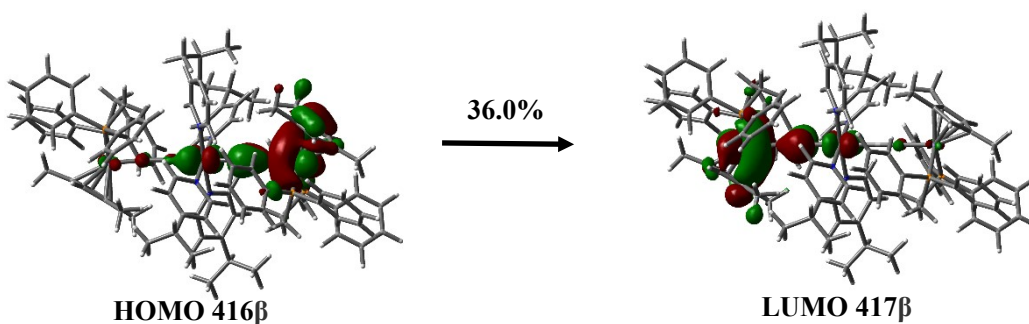

**Figure S25.** The major electronic transitions corresponding to the NIR band ( $\lambda = 878$  nm,  $f = 0.0422$ ) of  $3^{3+}$ .

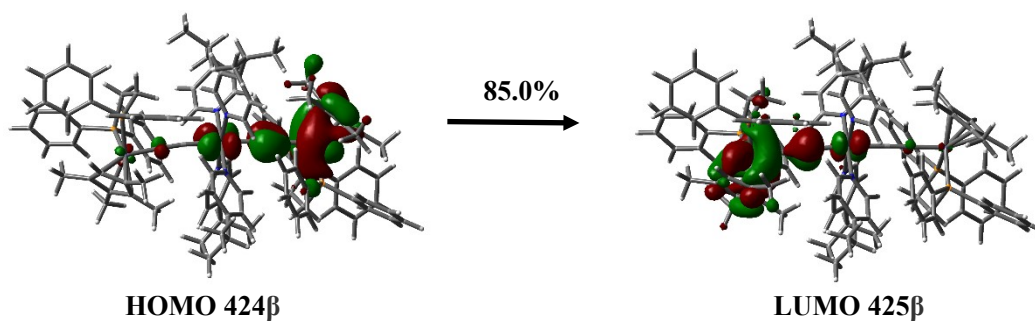

**Figure S26.** The major electronic transitions corresponding to the NIR band ( $\lambda = 801$  nm,  $f = 0.0415$ ) of  $4^{3+}$ .



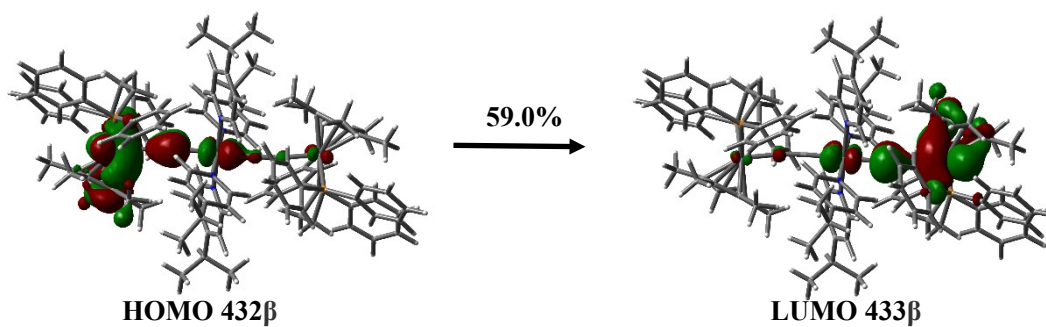

**Figure S27.** The major electronic transitions corresponding to the NIR band ( $\lambda = 1052$  nm,  $f = 0.0541$ ) of  $5^{3+}$ .

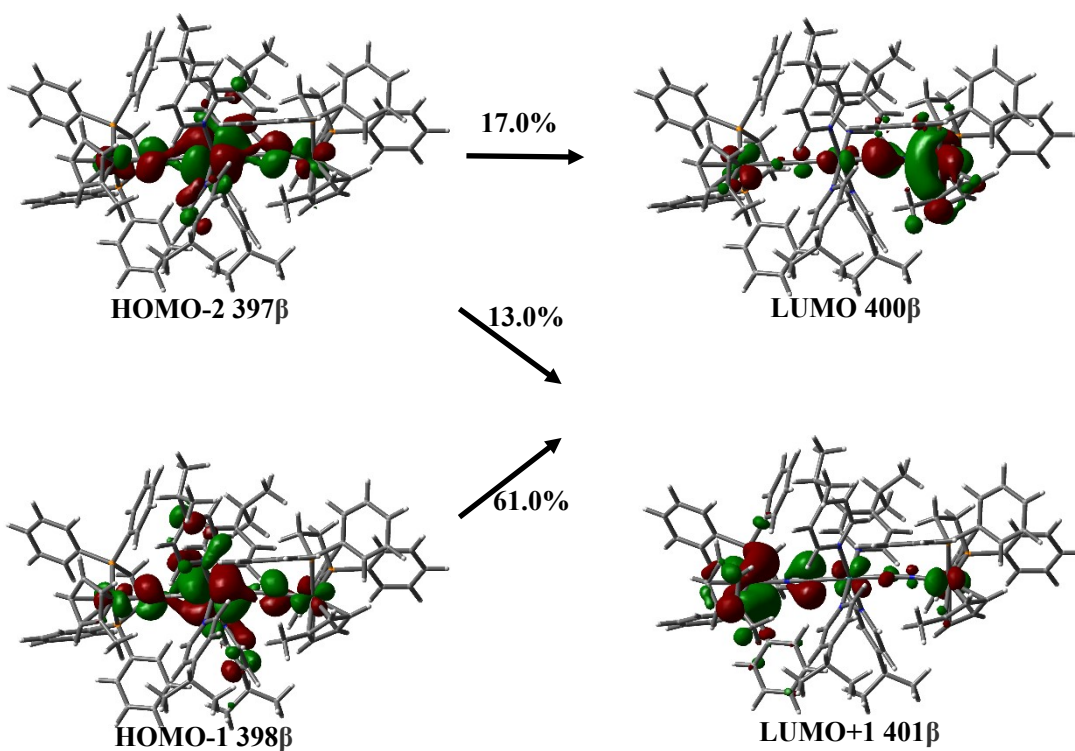

**Figure S28.** The major electronic transitions corresponding to the NIR band ( $\lambda = 606$  nm,  $f = 0.1741$ ) of  $2^{4+}$ .



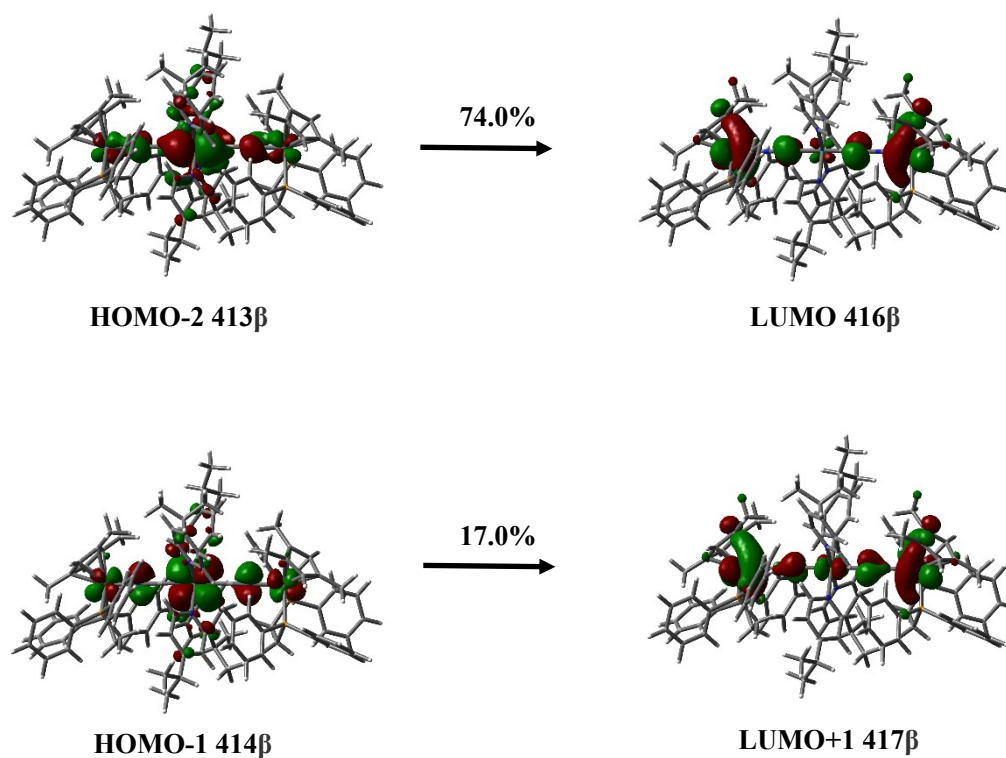

**Figure S29.** The major electronic transitions corresponding to the NIR band ( $\lambda = 578$  nm,  $f = 0.1898$ ) of  $3^{4+}$ .

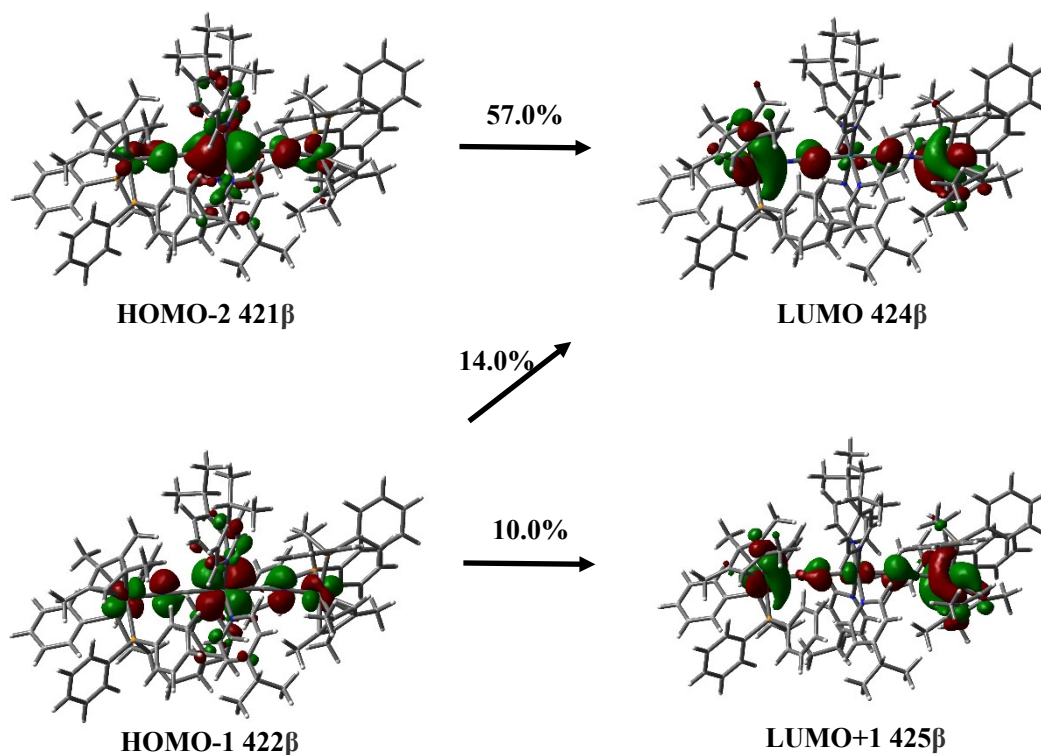

**Figure S30.** The major electronic transitions corresponding to the NIR band ( $\lambda = 546$  nm,  $f = 0.1482$ ) of  $4^{4+}$ .

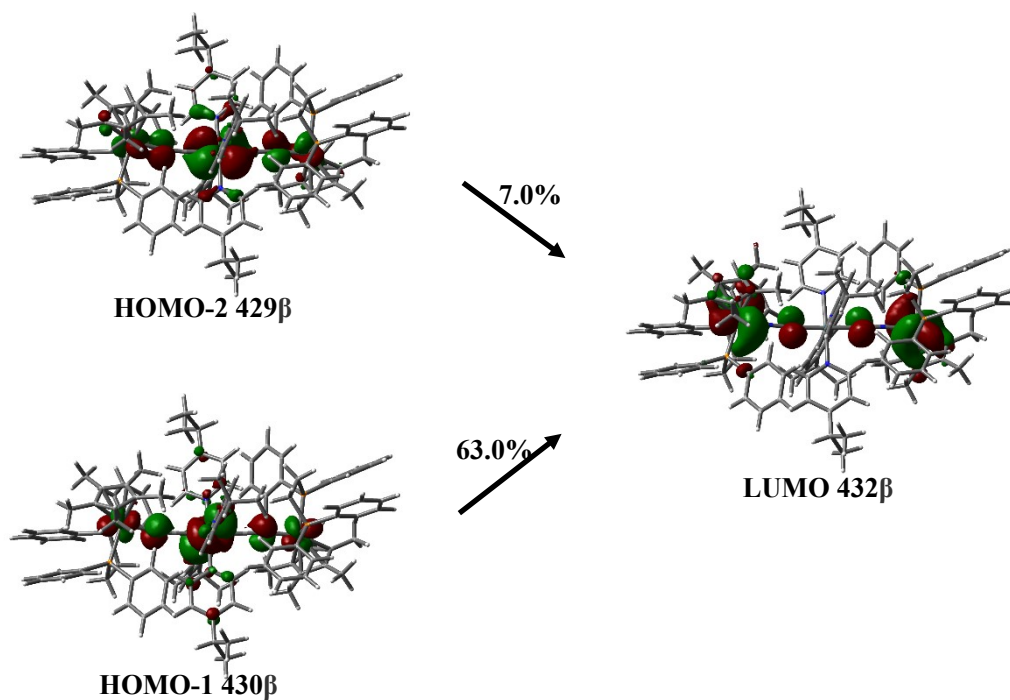

**Figure S31.** The major electronic transitions corresponding to the NIR band ( $\lambda = 537$  nm,  $f = 0.0391$ ) of  $5^{4+}$ .

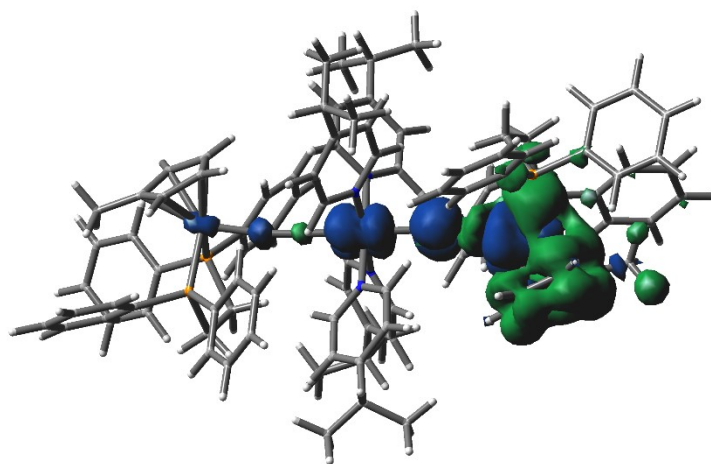

**Figure S32.** Computed spin densities of  $2^{3+}$ .

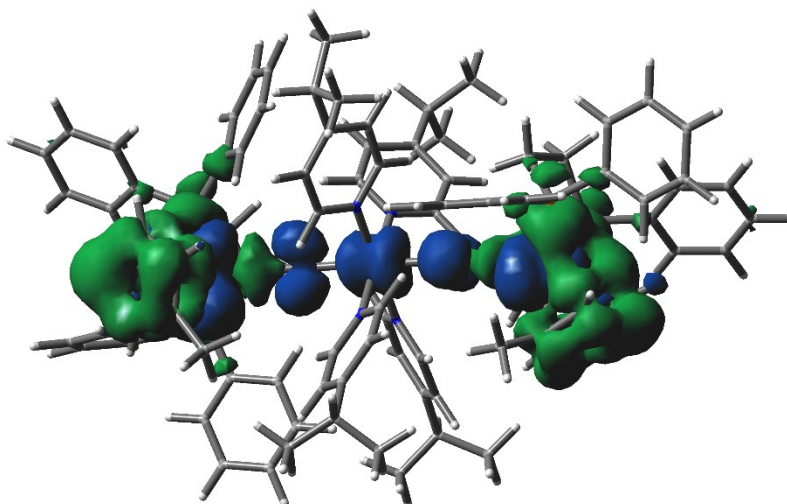

**Figure S33.** Computed spin densities of  $2^{4+}$ .

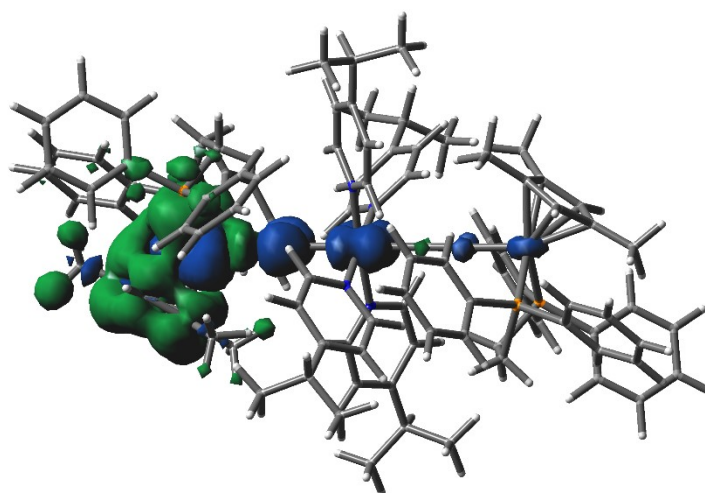

**Figure S34.** Computed spin densities of  $3^{3+}$ .

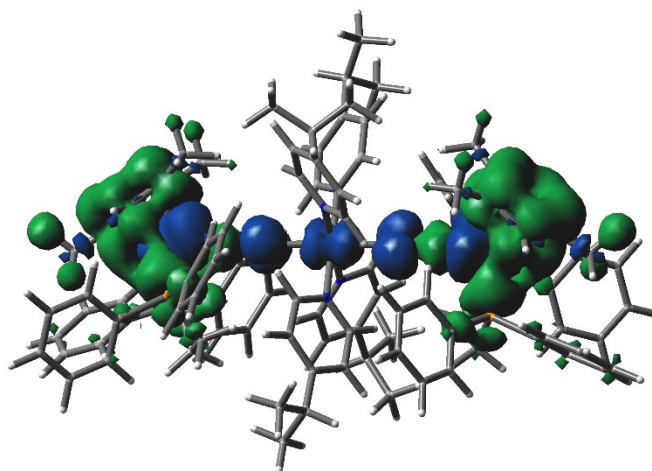

**Figure S35.** Computed spin densities of  $3^{4+}$ .

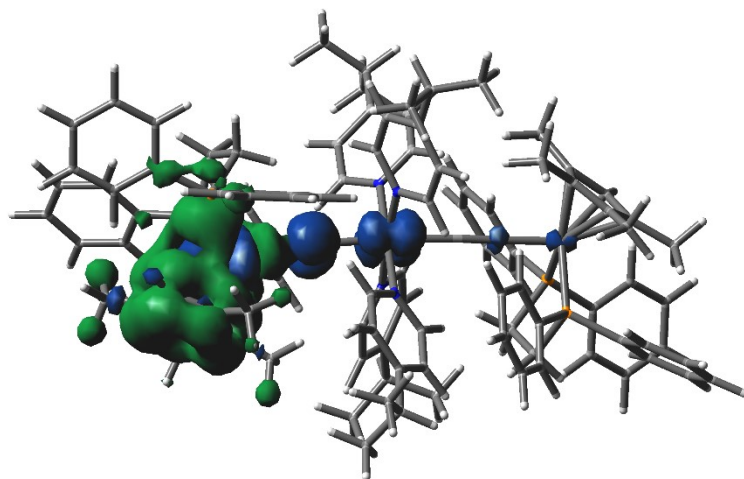

**Figure S36.** Computed spin densities of  $4^{3+}$ .

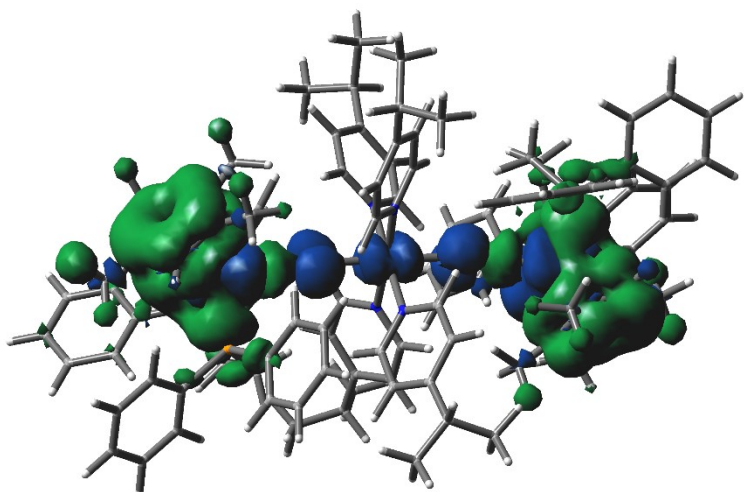

**Figure S37.** Computed spin densities of  $4^{4+}$ .

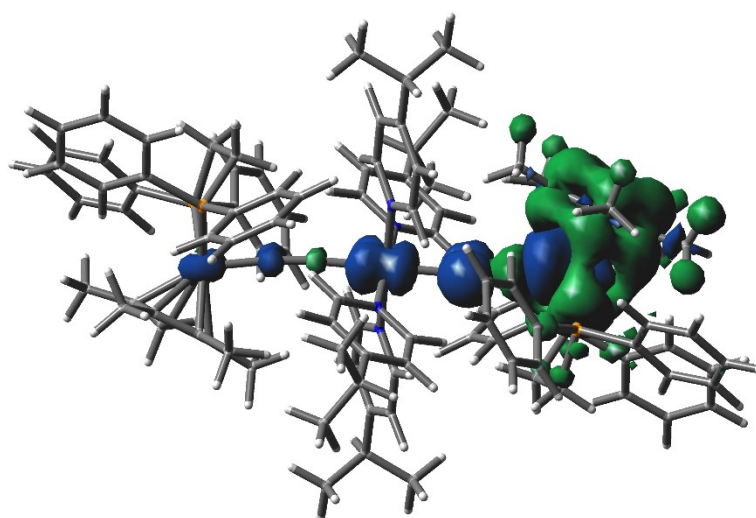

**Figure S38.** Computed spin densities of  $5^{3+}$ .

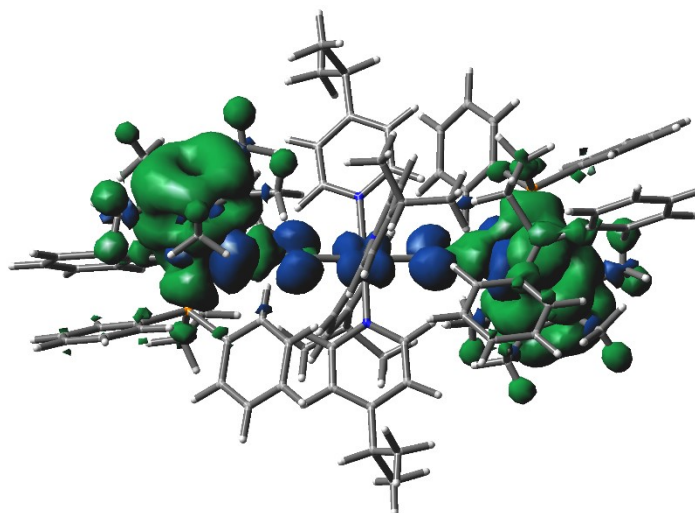

**Figure S39.** Computed spin densities of  $5^{4+}$ .

**Notes and references**

1. Y.-Y. Yang, X.-Q. Zhu, J.-P. Launay, C.-B. Hong, S.-D. Su, Y.-H. Wen, X.-T. Wu and T.-L. Sheng, *Angew. Chem. Int. Ed.*, 2021, **60**, 4804-4814.

**Table S8.** Optimized Cartesian Coordinates of  $1^{3+}$ .

|    |           |          |          |   |          |          |          |
|----|-----------|----------|----------|---|----------|----------|----------|
| Ru | -0.060597 | 0.483578 | -0.1078  | C | 1.468234 | 3.771616 | 4.548804 |
| Fe | -4.849595 | -0.19113 | 1.423018 | H | 1.081946 | 3.382926 | 5.500591 |
| Fe | 4.934072  | -0.28972 | -1.40481 | C | -1.53944 | 3.854281 | -4.60433 |
| P  | -5.29993  | 1.834658 | 0.501224 | H | -1.17538 | 3.503862 | -5.57981 |
| P  | 5.364119  | 1.787309 | -0.47507 | C | -4.29957 | -0.05598 | 3.466938 |
| P  | -5.613369 | -1.02691 | -0.54576 | H | -3.44616 | 0.46926  | 3.873457 |
| P  | 5.57245   | -1.07439 | 0.660661 | C | 8.271492 | 4.231318 | -2.15042 |
| N  | 0.427654  | 0.96221  | 1.395779 | H | 8.304105 | 5.07452  | -2.83224 |
| N  | -0.298101 | 1.012219 | -1.55869 | C | -0.92886 | -3.98987 | -3.46555 |
| N  | 0.276576  | -2.03173 | 1.3308   | C | -1.09631 | 2.072977 | -1.25583 |
| N  | 3.152577  | -0.34907 | -0.85217 | H | -1.42484 | 2.154716 | -0.22543 |
| N  | -3.086114 | -0.24759 | 0.717216 | C | 3.164585 | 5.295433 | -0.45673 |
| N  | -0.355005 | -1.96414 | -1.56292 | H | 3.191997 | 6.241481 | 0.074471 |
| C  | 3.137658  | 2.868901 | -1.87223 | C | 4.880606 | -2.73435 | 1.137725 |
| H  | 3.116663  | 1.923964 | -2.41139 | C | 1.229716 | 2.035674 | 1.152286 |
| C  | 0.230979  | 1.710285 | 3.684898 | H | 1.597912 | 2.141919 | 0.135955 |
| H  | -0.191038 | 1.544022 | 4.671867 | C | -3.52664 | -4.60648 | -0.74489 |
| C  | 1.989795  | -0.45964 | -0.56585 | H | -2.82433 | -5.15069 | -0.11751 |
| C  | 4.085764  | 3.080579 | -0.86069 | C | -9.2923  | 3.800691 | 1.949351 |
| C  | -6.862967 | 3.817285 | 1.858196 | H | -10.2223 | 4.239185 | 2.295696 |
| H  | -5.919603 | 4.279082 | 2.143096 | C | -3.97504 | -5.17909 | -1.94401 |

|   |           |          |          |   |          |          |          |
|---|-----------|----------|----------|---|----------|----------|----------|
| C | -6.882042 | 2.671954 | 1.044124 | H | -3.62868 | -6.16529 | -2.24043 |
| C | -4.022211 | 3.187053 | 0.68322  | C | 1.572352 | 2.953932 | 2.14023  |
| C | 7.036295  | 3.671053 | -1.7967  | H | 2.211949 | 3.790184 | 1.869918 |
| H | 6.120453  | 4.092582 | -2.20655 | C | -8.2089  | -1.95171 | 0.049262 |
| C | -0.705238 | -2.96685 | 1.44492  | H | -7.72742 | -2.43347 | 0.897571 |
| H | -1.505253 | -2.90801 | 0.714397 | C | -5.50646 | 1.643359 | -1.39216 |
| C | 6.99143   | 2.584527 | -0.90441 | H | -6.56507 | 1.812221 | -1.62407 |
| C | 2.200342  | 3.86817  | -2.17011 | H | -4.92217 | 2.42564  | -1.89103 |
| H | 1.472699  | 3.7031   | -2.96055 | C | 5.867573 | 0.393893 | -3.22548 |
| C | -0.083406 | 0.827438 | 2.649733 | H | 6.133286 | 1.420245 | -3.44346 |
| H | -0.748931 | -0.01523 | 2.811595 | C | -2.02015 | 4.026243 | 1.777262 |
| C | -1.95023  | -0.36631 | 0.385334 | H | -1.21213 | 3.88512  | 2.491767 |
| C | -0.70685  | -3.93319 | 2.449133 | C | 2.205003 | 5.075571 | -1.4589  |
| H | -1.530181 | -4.64042 | 2.504932 | H | 1.479696 | 5.848074 | -1.69618 |
| C | 6.699748  | -0.55673 | -2.52864 | C | -1.76722 | -2.8724  | -3.29726 |
| H | 7.706629  | -0.37556 | -2.17852 | H | -2.67191 | -2.77127 | -3.89115 |
| C | 0.139067  | 0.894981 | -2.8414  | C | -5.61361 | 0.482406 | 3.288601 |
| H | 0.781875  | 0.045996 | -3.05476 | H | -5.91994 | 1.499015 | 3.500261 |
| C | 5.980019  | -1.80835 | -2.4812  | C | 7.877049 | -0.56086 | 2.281764 |
| H | 6.334738  | -2.74449 | -2.07143 | H | 7.225865 | -0.01009 | 2.956656 |
| C | -0.240675 | 1.787528 | -3.84535 | C | -3.17614 | 5.408026 | 0.147096 |
| H | 0.112949  | 1.631356 | -4.8606  | H | -3.27618 | 6.346084 | -0.39064 |
| C | -4.008772 | -3.35204 | -0.34489 | C | -4.90544 | -4.49653 | -2.74371 |
| H | -3.698472 | -2.9011  | 0.598091 | H | -5.27635 | -4.95311 | -3.65638 |
| C | -4.935736 | -2.66487 | -1.14493 | C | 0.232586 | -4.21037 | 5.889436 |
| C | 9.41537   | 2.621038 | -0.73801 | H | 1.135024 | -3.60693 | 6.054161 |
| H | 10.333594 | 2.215061 | -0.32563 | H | 0.158145 | -4.92623 | 6.714242 |
| C | 4.709773  | -1.61039 | -3.10867 | H | -0.63824 | -3.54699 | 5.934913 |
| H | 3.922306  | -2.34666 | -3.19704 | C | -8.06702 | 4.378884 | 2.307386 |
| C | -5.047284 | 0.247147 | -1.83003 | H | -8.04718 | 5.265319 | 2.93318  |
| H | -3.950657 | 0.189876 | -1.82816 | C | 3.938333 | -3.37663 | 0.317826 |
| H | -5.39992  | -0.0084  | -2.83689 | H | 3.593694 | -2.88731 | -0.59135 |
| C | -7.447947 | -1.19834 | -0.86343 | C | -2.11548 | 5.22122  | 1.050677 |
| C | 9.460507  | 3.709624 | -1.62191 | H | -1.38765 | 6.012555 | 1.207018 |
| H | 10.414153 | 4.148493 | -1.895   | C | -9.58913 | -2.10155 | -0.13143 |
| C | 1.091972  | 2.798009 | 3.45507  | H | -10.1669 | -2.68734 | 0.575929 |
| C | 5.356047  | 1.604409 | 1.420857 | C | 3.916967 | -5.27038 | 1.837039 |
| H | 6.379162  | 1.786364 | 1.76971  | H | 3.565468 | -6.26393 | 2.096098 |
| H | 4.711621  | 2.39054  | 1.831337 | C | -0.93193 | 5.244142 | -4.33041 |
| C | 8.18579   | 2.053306 | -0.3825  | H | -1.26338 | 5.957735 | -5.0916  |
| H | 8.175717  | 1.202231 | 0.297877 | H | 0.164976 | 5.221206 | -4.34742 |
| C | 1.370981  | -3.04097 | 3.235956 | H | -1.25774 | 5.62431  | -3.35166 |
| H | 2.219072  | -3.02722 | 3.914926 | C | -10.2238 | -1.49718 | -1.22734 |
| C | -5.661139 | -1.74119 | 2.623234 | H | -11.2938 | -1.60998 | -1.36651 |

|   |            |          |          |   |          |          |          |
|---|------------|----------|----------|---|----------|----------|----------|
| H | -6.00132   | -2.70709 | 2.272527 | C | 2.995938 | 3.913582 | 4.667264 |
| C | 1.312617   | -2.09877 | 2.211574 | H | 3.419397 | 4.38583  | 3.769084 |
| H | 2.098322   | -1.36024 | 2.085334 | H | 3.482843 | 2.941509 | 4.812984 |
| C | 4.639345   | -0.2525  | -3.56563 | H | 3.249406 | 4.551618 | 5.519732 |
| H | 3.799407   | 0.201936 | -4.07252 | C | -0.69671 | -6.41952 | -4.19973 |
| C | -6.458144  | -0.54131 | 2.739085 | H | 0.399622 | -6.44355 | -4.26025 |
| H | -7.512038  | -0.44063 | 2.520873 | H | -1.07024 | -7.14379 | -4.93019 |
| C | 4.847422   | 0.218371 | 1.826909 | H | -0.99624 | -6.75937 | -3.20054 |
| H | 3.759586   | 0.15611  | 1.700167 | C | 0.820328 | 5.146781 | 4.291716 |
| H | 5.08336    | -0.01913 | 2.871285 | H | 1.125036 | 5.857679 | 5.06651  |
| C | 7.376279   | -1.16788 | 1.11566  | H | -0.27433 | 5.089944 | 4.301179 |
| C | -9.469104  | -0.75918 | -2.14946 | H | 1.138015 | 5.552524 | 3.32039  |
| H | -9.953933  | -0.30173 | -3.00586 | C | 4.857545 | -4.62848 | 2.657195 |
| C | 0.211214   | -4.05198 | -2.64289 | H | 5.22783  | -5.1227  | 3.549679 |
| H | 0.89711    | -4.89093 | -2.70954 | C | 8.246553 | -1.90432 | 0.291157 |
| C | -2.97224   | 3.012112 | 1.596489 | H | 7.871164 | -2.42048 | -0.58927 |
| H | -2.905016  | 2.077931 | 2.152944 | C | 5.344158 | -3.36197 | 2.308754 |
| C | -1.092276  | 2.868272 | -3.54962 | H | 6.102179 | -2.88636 | 2.928758 |
| C | -4.127406  | 4.394307 | -0.03424 | C | -1.24215 | -5.02414 | -4.52159 |
| H | -4.968696  | 4.559544 | -0.70631 | H | -2.33818 | -5.08354 | -4.60535 |
| C | -1.500135  | 3.002086 | -2.20946 | C | -3.07474 | 3.946666 | -4.66267 |
| H | -2.14523   | 3.816032 | -1.88942 | H | -3.47845 | 4.374197 | -3.73383 |
| C | 0.309934   | -4.96066 | 4.54582  | H | -3.53462 | 2.964112 | -4.81988 |
| H | -0.592962  | -5.57818 | 4.445214 | H | -3.38112 | 4.60194  | -5.48423 |
| C | -8.112971  | 2.083749 | 0.69893  | C | 10.10626 | -1.37682 | 1.760873 |
| H | -8.150424  | 1.17929  | 0.091594 | H | 11.15908 | -1.45678 | 2.00942  |
| C | -4.336449  | -1.44104 | 3.060357 | C | 9.605733 | -2.00657 | 0.611    |
| H | -3.495988  | -2.12343 | 3.064224 | H | 10.26963 | -2.58039 | -0.02678 |
| C | -1.464811  | -1.89929 | -2.35008 | C | 1.533398 | -5.89177 | 4.521643 |
| H | -2.116729  | -1.04652 | -2.19423 | H | 1.589829 | -6.45657 | 3.583968 |
| C | -9.312689  | 2.651787 | 1.144607 | H | 1.474197 | -6.60785 | 5.347603 |
| H | -10.258022 | 2.195647 | 0.867293 | H | 2.464498 | -5.32097 | 4.642562 |
| C | 4.107541   | 4.302634 | -0.16017 | C | 3.45609  | -4.64399 | 0.670787 |
| H | 4.871853   | 4.49609  | 0.591723 | H | 2.738816 | -5.15277 | 0.03244  |
| C | 0.331357   | -3.97901 | 3.396317 | C | 9.238796 | -0.66283 | 2.599455 |
| C | -8.085456  | -0.61392 | -1.97157 | H | 9.618053 | -0.19407 | 3.501361 |
| H | -7.523453  | -0.03834 | -2.70414 | C | -0.68908 | -4.53268 | -5.87754 |
| C | 0.46486    | -3.03788 | -1.72089 | H | -1.1046  | -3.55771 | -6.15817 |
| H | 1.332655   | -3.06873 | -1.06927 | H | -0.9346  | -5.2498  | -6.66738 |
| C | -5.387124  | -3.24184 | -2.3449  | H | 0.404644 | -4.44215 | -5.83035 |
| H | -6.141131  | -2.73696 | -2.94679 |   |          |          |          |

**Table S9.** Optimized Cartesian Coordinates of  $2^{3+}$ .

|    |          |          |          |   |          |          |          |
|----|----------|----------|----------|---|----------|----------|----------|
| Ru | 0.053904 | -0.31649 | 0.017457 | H | -2.40174 | -2.38498 | -4.07106 |
|----|----------|----------|----------|---|----------|----------|----------|



|    |          |          |          |   |          |          |          |
|----|----------|----------|----------|---|----------|----------|----------|
| Fe | -4.93218 | -0.26664 | 1.334242 | C | -0.59686 | -2.95973 | 1.361889 |
| Fe | 4.937773 | -0.26792 | -1.2996  | H | -1.3175  | -2.95118 | 0.550775 |
| P  | 5.452215 | 1.713682 | -0.23226 | C | -2.64919 | 5.382557 | 1.256721 |
| P  | -5.68522 | -1.26136 | -0.55814 | H | -2.03798 | 6.243056 | 1.512726 |
| P  | 5.789663 | -1.22564 | 0.639808 | C | 0.74464  | -4.5802  | 5.801865 |
| P  | -5.31976 | 1.678315 | 0.221552 | H | 0.643484 | -5.40586 | 6.513083 |
| N  | 3.184742 | -0.23362 | -0.60274 | H | 0.084823 | -3.76923 | 6.129467 |
| C  | 7.613886 | -1.25398 | 1.011159 | H | 1.783646 | -4.2306  | 5.862669 |
| N  | -0.29806 | 1.266261 | -1.34113 | C | 1.17026  | 2.094075 | 1.543428 |
| C  | 8.10657  | -0.80059 | 2.249189 | H | 1.699532 | 2.215277 | 0.601773 |
| H  | 7.439034 | -0.41295 | 3.01453  | C | 0.399693 | -5.06673 | 4.388175 |
| C  | -4.26196 | 3.16939  | 0.627579 | H | -0.59298 | -5.53757 | 4.412707 |
| N  | 0.296285 | 1.053495 | 1.617275 | C | -1.06838 | 2.318679 | -0.95306 |
| N  | -3.14361 | -0.26849 | 0.670035 | H | -1.39217 | 2.333064 | 0.080833 |
| C  | -5.75478 | -1.78652 | 2.564989 | C | 10.37153 | -1.36535 | 1.571269 |
| H  | -6.12521 | -2.74455 | 2.219607 | H | 11.43385 | -1.40653 | 1.786697 |
| C  | -4.41662 | -1.49301 | 2.969912 | C | -5.68289 | 0.435483 | 3.19427  |
| H  | -3.58205 | -2.18237 | 2.973767 | H | -5.9767  | 1.450905 | 3.427954 |
| N  | -0.2475  | -1.71322 | -1.5521  | C | -10.1425 | -2.68996 | -0.50136 |
| C  | -7.46207 | -1.84259 | -0.60436 | H | -11.176  | -3.01818 | -0.46613 |
| C  | 3.195576 | 2.960487 | -1.45866 | C | -7.76952 | -3.18627 | -0.32304 |
| H  | 3.123013 | 2.065454 | -2.07366 | H | -6.97523 | -3.9119  | -0.156   |
| C  | -1.98538 | -0.3156  | 0.402292 | C | 9.88237  | -1.84893 | 0.348613 |
| C  | 4.661344 | -1.7374  | -2.85791 | H | 10.56421 | -2.27271 | -0.38112 |
| H  | 4.041496 | -2.61615 | -2.74695 | C | -0.24698 | 2.208921 | -3.56412 |
| N  | 0.270277 | -1.91098 | 1.398167 | H | 0.093321 | 2.121465 | -4.59199 |
| C  | -8.50402 | -0.92504 | -0.82009 | C | 7.077759 | 3.596257 | -1.57627 |
| H  | -8.29494 | 0.128728 | -0.99781 | H | 6.153032 | 3.94389  | -2.0333  |
| C  | -0.22744 | 1.742071 | 3.874242 | C | -7.01829 | 2.453041 | 0.093479 |
| H  | -0.80264 | 1.564452 | 4.779547 | C | 2.287397 | 4.013077 | -1.64293 |
| C  | -0.56514 | -3.49782 | -3.74301 | H | 1.52875  | 3.937546 | -2.41809 |
| C  | 9.472555 | 2.753267 | -0.38018 | C | -9.83856 | -1.34917 | -0.77697 |
| H  | 10.39666 | 2.430207 | 0.088365 | H | -10.6359 | -0.63322 | -0.94991 |
| C  | -5.15021 | -3.35346 | -2.4174  | C | -1.46171 | 3.326274 | -1.8279  |
| H  | -5.95975 | -2.92135 | -3.00373 | H | -2.0926  | 4.123317 | -1.44085 |
| C  | -4.77756 | -2.77166 | -1.19139 | C | -7.68782 | 2.621368 | -1.13095 |
| C  | -5.5557  | -0.02299 | -2.01676 | H | -7.23433 | 2.302533 | -2.06733 |
| H  | -5.00255 | -0.51138 | -2.82757 | C | 4.243257 | -5.54635 | 1.482824 |
| H  | -6.57226 | 0.167589 | -2.38123 | H | 3.880851 | -6.55262 | 1.669129 |
| C  | 0.35614  | -3.95401 | 3.366187 | C | 3.844117 | -3.26998 | 0.738113 |
| C  | 4.184894 | 3.05745  | -0.46937 | H | 3.169679 | -2.50702 | 0.354604 |
| C  | 8.263891 | 2.139965 | -0.0255  | C | -9.56751 | 3.649268 | 0.017035 |
| H  | 8.280821 | 1.332707 | 0.705425 | H | -10.5505 | 4.107453 | -0.01227 |
| C  | -4.52117 | -4.52251 | -2.86184 | C | 1.195794 | -1.89401 | 2.395125 |



|   |          |          |          |   |          |          |          |
|---|----------|----------|----------|---|----------|----------|----------|
| H | -4.84214 | -4.98925 | -3.78851 | H | 1.875038 | -1.0469  | 2.400822 |
| C | -7.62716 | 2.910756 | 1.276059 | C | 2.275252 | 4.359513 | 5.07903  |
| H | -7.10838 | 2.821508 | 2.228687 | H | 2.423305 | 5.083093 | 4.265673 |
| C | -3.77618 | -3.37102 | -0.41381 | H | 3.074583 | 3.609956 | 5.030974 |
| H | -3.52361 | -2.92377 | 0.547678 | H | 2.384783 | 4.909265 | 6.018875 |
| C | -8.89454 | 3.50464  | 1.239719 | C | -0.57959 | -3.97612 | 2.314658 |
| H | -9.35377 | 3.855744 | 2.158002 | H | -1.30781 | -4.7811  | 2.249958 |
| C | -0.40416 | 0.901344 | 2.777741 | C | 5.054962 | -0.07832 | 1.943197 |
| H | -1.10707 | 0.074416 | 2.808744 | H | 3.969433 | -0.19608 | 1.854595 |
| C | -0.20106 | 4.821541 | 4.971511 | H | 5.351032 | -0.39255 | 2.950078 |
| H | -0.09406 | 5.483232 | 5.836918 | C | 3.360957 | 5.263428 | 0.142089 |
| H | -1.21395 | 4.401023 | 4.990884 | H | 3.441736 | 6.162069 | 0.745323 |
| H | -0.0928  | 5.433241 | 4.06403  | C | 3.370162 | -4.56134 | 0.995218 |
| C | -3.13596 | -4.53593 | -0.86666 | H | 2.323889 | -4.79995 | 0.814337 |
| H | -2.37018 | -5.01401 | -0.25951 | C | -8.95917 | 3.213431 | -1.16781 |
| C | 0.699558 | 2.801522 | 3.821495 | H | -9.46812 | 3.339045 | -2.11823 |
| C | 2.006567 | -0.26556 | -0.36167 | C | 2.362278 | 5.159307 | -0.84014 |
| C | 9.480276 | -0.8512  | 2.524008 | H | 1.660522 | 5.974357 | -0.989   |
| H | 9.850499 | -0.50132 | 3.481871 | C | -6.55838 | -0.59355 | 2.695622 |
| C | 7.061648 | 2.564815 | -0.61812 | C | 1.420133 | -6.12778 | 3.923905 |
| C | 0.527899 | -3.59304 | -2.85643 | H | 2.424599 | -5.68462 | 3.860813 |
| H | 1.279526 | -4.36594 | -2.99673 | H | 1.158264 | -6.53849 | 2.940233 |
| C | 6.06706  | -3.93827 | 1.479224 | H | 1.456997 | -6.95427 | 4.640833 |
| H | 7.11074  | -3.706   | 1.676969 | C | 0.658312 | -2.70249 | -1.79745 |
| C | -3.50795 | -5.11255 | -2.08863 | H | 1.500101 | -2.76169 | -1.11498 |
| H | -3.03178 | -6.02868 | -2.42704 | C | 0.883047 | 3.721962 | 5.007883 |
| C | 6.055217 | -1.65425 | -2.56022 | H | 0.722942 | 3.125018 | 5.917147 |
| H | 6.666866 | -2.48548 | -2.2357  | C | -9.10562 | -3.60628 | -0.27134 |
| C | 5.192998 | -2.95438 | 0.98477  | H | -9.33612 | -4.645   | -0.05761 |
| C | -3.23529 | 3.04502  | 1.575831 | C | -4.37002 | -0.1042  | 3.362792 |
| H | -3.07555 | 2.082447 | 2.06198  | H | -3.5102  | 0.427941 | 3.746595 |
| C | -0.64275 | -4.42444 | -4.93814 | C | 5.470651 | 1.365331 | 1.642882 |
| H | -0.48844 | -5.44924 | -4.5656  | H | 6.480092 | 1.582334 | 2.011162 |
| C | -4.49513 | 4.411213 | 0.008805 | H | 4.780758 | 2.07333  | 2.115544 |
| H | -5.32102 | 4.525351 | -0.69201 | C | 7.920958 | 0.183104 | -2.81222 |
| C | 9.489208 | 3.779966 | -1.33546 | H | 7.960668 | 1.275391 | -2.87088 |
| H | 10.4262  | 4.253812 | -1.60804 | H | 8.450707 | -0.21265 | -3.68752 |
| C | 5.35947  | 0.439809 | -3.26582 | H | 8.477181 | -0.12644 | -1.92099 |
| H | 5.382205 | 1.476351 | -3.57792 | C | -1.97543 | -4.36923 | -5.68726 |
| C | 8.510072 | -1.79634 | 0.072908 | H | -2.82873 | -4.57211 | -5.02913 |
| H | 8.146856 | -2.20094 | -0.86807 | H | -1.98325 | -5.11449 | -6.48851 |
| C | -1.33287 | -1.64565 | -2.36995 | H | -2.12345 | -3.38722 | -6.15653 |
| H | -2.06399 | -0.8787  | -2.13435 | C | 8.290653 | 4.20035  | -1.93184 |
| C | 6.512714 | -0.30994 | -2.81663 | H | 8.299803 | 5.001277 | -2.66359 |

|   |          |          |          |   |          |          |          |
|---|----------|----------|----------|---|----------|----------|----------|
| C | 0.120756 | 1.234849 | -2.63376 | C | -1.04907 | 5.737947 | -3.7313  |
| H | 0.7366   | 0.386864 | -2.91768 | H | -1.47158 | 6.017559 | -2.75619 |
| C | 4.2747   | 4.217731 | 0.324338 | H | -1.376   | 6.486986 | -4.45975 |
| H | 5.07178  | 4.323347 | 1.059065 | H | 0.044415 | 5.790058 | -3.66319 |
| C | 1.267711 | -2.88151 | 3.375066 | C | -1.06999 | 3.283912 | -3.1791  |
| H | 2.027848 | -2.80565 | 4.146206 | C | 0.513021 | -4.09939 | -5.91129 |
| C | -3.68932 | 5.515238 | 0.321098 | H | 0.402165 | -3.07989 | -6.30284 |
| H | -3.88623 | 6.477562 | -0.14148 | H | 0.492453 | -4.7903  | -6.76004 |
| C | 4.23175  | -0.44318 | -3.30541 | H | 1.496604 | -4.18168 | -5.4338  |
| H | 3.220951 | -0.17958 | -3.58488 | C | -3.06459 | 4.315783 | -4.28695 |
| C | -2.42637 | 4.148236 | 1.884826 | H | -3.53892 | 4.577229 | -3.33013 |
| H | -1.63441 | 4.046161 | 2.624098 | H | -3.42912 | 3.32873  | -4.59442 |
| C | 5.588087 | -5.23311 | 1.72379  | H | -3.39195 | 5.048535 | -5.03158 |
| H | 6.263718 | -5.9931  | 2.101752 | C | -1.52942 | 4.33895  | -4.15869 |
| C | -4.86121 | 1.272032 | -1.5736  | C | -8.03939 | -0.49967 | 2.512714 |
| H | -5.08848 | 2.114504 | -2.24026 | H | -8.33586 | 0.424406 | 2.000673 |
| H | -3.76997 | 1.147108 | -1.55706 | H | -8.54478 | -0.51724 | 3.486064 |
| C | 1.390627 | 2.968508 | 2.607585 | H | -8.42264 | -1.34309 | 1.927826 |
| H | 2.108885 | 3.772381 | 2.477962 | H | -1.09673 | 4.108491 | -5.14192 |
| C | -1.51432 | -2.50175 | -3.45789 |   |          |          |          |

**Table S10.** Optimized Cartesian Coordinates of  $\mathbf{3}^{3+}$ .

|    |          |          |          |   |          |          |          |
|----|----------|----------|----------|---|----------|----------|----------|
| Ru | -0.04634 | 0.109874 | 0.099367 | C | 5.192659 | -0.6313  | -2.01865 |
| Fe | 4.986616 | -0.07907 | 1.356568 | H | 6.162013 | -0.64335 | -2.53125 |
| Fe | -4.94952 | -0.078   | -1.32039 | H | 4.495592 | -1.21838 | -2.62899 |
| P  | 5.404378 | 1.525136 | -0.20582 | C | -10.3867 | 2.46116  | -0.22681 |
| P  | 5.412628 | -1.53442 | -0.3387  | H | -11.4424 | 2.686551 | -0.33342 |
| P  | -5.83906 | 1.472629 | 0.17176  | C | -3.60185 | 4.762173 | -1.00507 |
| P  | -5.314   | -1.55369 | 0.427035 | H | -2.92108 | 5.013029 | -1.81306 |
| N  | -3.15576 | 0.106942 | -0.69567 | C | 8.196871 | -0.4395  | 2.151639 |
| C  | 0.314814 | 3.129258 | 3.252479 | H | 8.422897 | -1.44017 | 1.768525 |
| H  | 0.921652 | 3.199139 | 4.152471 | H | 8.82749  | -0.27621 | 3.034468 |
| N  | -0.44434 | -1.03933 | 1.830944 | H | 8.499056 | 0.289447 | 1.389466 |
| N  | 3.129127 | -0.00496 | 0.875682 | C | 1.292109 | -1.77753 | -1.89922 |
| C  | 4.611667 | -0.86907 | 3.298828 | H | 2.04721  | -0.99967 | -1.83951 |
| C  | 5.832166 | -1.39611 | 2.775303 | C | 2.784053 | -5.39877 | -0.68333 |
| H  | 6.045849 | -2.44712 | 2.612383 | H | 2.207077 | -6.31796 | -0.73048 |
| C  | 1.972281 | 0.036609 | 0.594244 | C | -2.58731 | -4.53323 | 1.465496 |
| C  | 7.123218 | -2.28729 | -0.45272 | H | -1.86835 | -4.71985 | 2.25918  |
| N  | -0.26377 | 1.859472 | 1.278014 | C | -3.76    | -5.26085 | -0.53107 |
| C  | 6.064591 | 0.893094 | 2.900764 | H | -3.96008 | -6.01809 | -1.28265 |
| H  | 6.47635  | 1.895155 | 2.870163 | C | -9.56617 | -3.21675 | 1.459612 |
| C  | -1.99189 | 0.131048 | -0.39378 | H | -10.5477 | -3.61238 | 1.697729 |
| C  | 6.753615 | -0.31235 | 2.521875 | C | 7.138791 | 2.036879 | -0.69172 |
| C  | -0.77156 | -2.48294 | 4.254504 | C | -9.42588 | 3.322093 | -0.77849 |

|   |          |          |          |   |          |          |          |
|---|----------|----------|----------|---|----------|----------|----------|
| C | -7.02015 | -2.18986 | 0.843888 | H | -9.73758 | 4.215064 | -1.31001 |
| C | 0.073217 | -2.94228 | 3.225612 | C | -1.15122 | 2.838855 | 0.956937 |
| H | 0.646315 | -3.85859 | 3.344489 | H | -1.71261 | 2.700669 | 0.037259 |
| C | -7.47064 | -2.21545 | 2.176479 | C | -7.84257 | -2.70566 | -0.17186 |
| H | -6.84726 | -1.85325 | 2.990492 | H | -7.50413 | -2.7184  | -1.20502 |
| N | 0.46428  | 1.310382 | -1.57316 | C | 4.285159 | 5.515533 | -0.71814 |
| C | 4.579607 | -3.9994  | -1.53306 | H | 4.593295 | 6.360143 | -1.32638 |
| H | 5.398229 | -3.84235 | -2.23393 | C | 7.637673 | 1.88751  | -1.99745 |
| C | -5.01708 | 3.142691 | 0.12546  | H | 7.024757 | 1.456542 | -2.78654 |
| C | 3.302515 | -3.28891 | 0.40682  | C | 4.685286 | 0.8021   | -1.80892 |
| H | 3.135677 | -2.55436 | 1.193534 | H | 3.597357 | 0.820918 | -1.65571 |
| C | -8.09092 | -0.10744 | -2.53695 | H | 4.906739 | 1.451497 | -2.66606 |
| H | -8.44754 | -0.71865 | -1.70143 | C | 8.94235  | 2.297565 | -2.31048 |
| H | -8.5811  | -0.47258 | -3.44806 | H | 9.317727 | 2.17677  | -3.32178 |
| H | -8.43246 | 0.918745 | -2.3694  | C | -0.61806 | -3.73258 | -1.93584 |
| C | -8.61645 | 1.021826 | 0.61038  | H | -1.39259 | -4.49414 | -1.88413 |
| H | -8.32847 | 0.112583 | 1.136871 | C | -0.71207 | -2.6344  | -1.08835 |
| C | 4.558176 | 3.190497 | -0.05274 | H | -1.55189 | -2.52705 | -0.40663 |
| C | 7.377609 | -3.54084 | 0.134185 | C | 1.208728 | 2.435443 | -1.38366 |
| H | 6.568613 | -4.11625 | 0.580966 | H | 1.459772 | 2.686449 | -0.36043 |
| C | 8.184969 | -1.56699 | -1.02461 | C | 0.444211 | -3.29473 | 6.290711 |
| H | 8.027685 | -0.57654 | -1.4479  | H | 1.183181 | -3.85875 | 5.705883 |
| C | 8.675534 | -4.06872 | 0.135869 | H | 0.32829  | -3.80178 | 7.253909 |
| H | 8.862485 | -5.03751 | 0.587893 | H | 0.847962 | -2.29331 | 6.478286 |
| C | 3.417704 | -1.64004 | 3.759442 | C | 9.756291 | 2.869828 | -1.32351 |
| H | 2.482632 | -1.20287 | 3.376401 | H | 10.76489 | 3.18776  | -1.56588 |
| H | 3.356257 | -1.64257 | 4.855875 | C | 0.426931 | 6.312572 | 3.559703 |
| H | 3.467625 | -2.68681 | 3.432706 | H | 0.408796 | 6.647971 | 2.512823 |
| C | 0.21552  | -2.20918 | 2.050464 | H | 1.396932 | 5.840307 | 3.758026 |
| H | 0.881089 | -2.53376 | 1.256975 | H | 0.347553 | 7.197417 | 4.19922  |
| C | 4.935312 | 4.28074  | -0.85704 | C | -3.98368 | 5.742515 | -0.07762 |
| H | 5.752173 | 4.178171 | -1.56978 | H | -3.60687 | 6.756176 | -0.17152 |
| C | 3.537833 | 3.347695 | 0.897671 | C | 1.653405 | 3.228077 | -2.43608 |
| H | 3.258888 | 2.497396 | 1.519087 | H | 2.249643 | 4.110268 | -2.20856 |
| C | -9.97927 | 1.31411  | 0.469715 | C | -8.06127 | 3.038716 | -0.63563 |
| H | -10.7188 | 0.648262 | 0.902896 | H | -7.32754 | 3.725468 | -1.05376 |
| C | -1.45902 | -1.27948 | 4.011305 | C | -5.58204 | 0.792664 | 1.93321  |
| H | -2.1198  | -0.86456 | 4.767387 | H | -5.04148 | 1.556607 | 2.503448 |
| C | -0.6173  | 4.13889  | 2.940781 | H | -6.5718  | 0.669457 | 2.388134 |
| C | 4.329708 | -3.05643 | -0.51912 | C | -4.45172 | 0.4999   | -3.36119 |
| C | 9.256586 | 3.043663 | -0.02409 | C | -4.46995 | -4.05465 | -0.55016 |
| H | 9.876088 | 3.501107 | 0.740358 | H | -5.21985 | -3.89334 | -1.32296 |
| N | 0.218814 | -1.63866 | -1.0747  | C | -2.08186 | 6.094836 | 3.670244 |
| C | -7.65241 | 1.887604 | 0.063986 | H | -2.1618  | 6.884823 | 4.423306 |

|   |          |          |          |   |          |          |          |
|---|----------|----------|----------|---|----------|----------|----------|
| C | -1.2783  | -0.59591 | 2.808753 | H | -2.9443  | 5.426409 | 3.785089 |
| H | -1.78125 | 0.347955 | 2.619722 | H | -2.14489 | 6.578932 | 2.685223 |
| C | -0.91007 | -3.23263 | 5.559078 | C | 1.347058 | 2.885633 | -3.76754 |
| H | -1.61874 | -2.68311 | 6.193963 | C | -5.78507 | -1.33526 | -2.8606  |
| C | 3.814108 | -5.1703  | -1.60982 | H | -6.12128 | -2.36032 | -2.77117 |
| H | 4.042201 | -5.91725 | -2.36463 | C | 3.257451 | 5.667048 | 0.227239 |
| C | 2.525899 | -4.45508 | 0.319659 | H | 2.768576 | 6.629473 | 0.347644 |
| H | 1.740949 | -4.6508  | 1.048911 | C | 0.56465  | 1.731242 | -3.95307 |
| C | -8.7418  | -2.72121 | 2.480242 | H | 0.276854 | 1.408155 | -4.94844 |
| H | -9.08273 | -2.73826 | 3.510081 | C | 9.730136 | -3.3506  | -0.4476  |
| C | 7.955533 | 2.630308 | 0.287781 | H | 10.73404 | -3.76209 | -0.44822 |
| H | 7.574793 | 2.785941 | 1.295204 | C | -0.7524  | 5.352417 | 3.833807 |
| C | 0.464156 | 2.025289 | 2.418536 | H | -0.66661 | 5.007903 | 4.874775 |
| H | 1.169362 | 1.234314 | 2.649574 | C | -4.46744 | -0.9422  | -3.25657 |
| C | 0.447759 | -3.84696 | -2.85089 | C | -3.28905 | 1.326542 | -3.79927 |
| C | -3.30231 | -3.32521 | 1.453184 | H | -3.58912 | 2.359269 | -4.00255 |
| H | -3.12234 | -2.59938 | 2.245112 | H | -2.85823 | 0.919839 | -4.72264 |
| C | 0.488079 | -5.00627 | -3.82684 | H | -2.49284 | 1.337846 | -3.04272 |
| H | 0.484135 | -5.9307  | -3.22684 | C | 1.200766 | 3.485926 | -6.24653 |
| C | -4.11725 | 3.461542 | -0.90177 | H | 1.391244 | 2.472737 | -6.62566 |
| H | -3.82436 | 2.695502 | -1.61614 | H | 1.588998 | 4.1848   | -6.99369 |
| C | -1.35143 | 3.967052 | 1.752955 | H | 0.116659 | 3.636261 | -6.17958 |
| H | -2.09087 | 4.697449 | 1.435283 | C | -9.11072 | -3.21666 | 0.133408 |
| C | -5.38759 | 4.121642 | 1.066958 | H | -9.73768 | -3.61625 | -0.6569  |
| H | -6.1083  | 3.891734 | 1.850065 | C | 3.412756 | 3.423201 | -5.03778 |
| C | 4.758548 | 0.569964 | 3.381936 | H | 3.951937 | 3.641792 | -4.10668 |
| C | 1.424463 | -2.83885 | -2.79506 | H | 3.846607 | 4.034707 | -5.83545 |
| H | 2.293397 | -2.86969 | -3.44336 | H | 3.572644 | 2.366702 | -5.29298 |
| C | -6.60982 | -0.16291 | -2.71313 | C | -1.46645 | -4.64933 | 5.32838  |
| C | -2.81561 | -5.5018  | 0.479522 | H | -1.59672 | -5.16217 | 6.286588 |
| H | -2.27929 | -6.44479 | 0.508199 | H | -0.77252 | -5.25303 | 4.727392 |
| C | 9.481051 | -2.09951 | -1.02859 | H | -2.43909 | -4.62834 | 4.820993 |
| H | 10.29237 | -1.53393 | -1.47613 | C | -5.75317 | 0.969827 | -3.0003  |
| C | 3.791866 | 1.508306 | 4.026342 | H | -6.07976 | 2.003499 | -3.01786 |
| H | 3.89527  | 2.529922 | 3.640558 | C | 1.724158 | -5.01617 | -4.72944 |
| H | 3.968233 | 1.549298 | 5.109163 | H | 1.734171 | -4.13838 | -5.3899  |
| H | 2.754983 | 1.176455 | 3.883765 | H | 1.712765 | -5.90445 | -5.36863 |
| C | -3.31257 | -1.84559 | -3.52509 | H | 2.658565 | -5.02909 | -4.15599 |
| H | -2.36666 | -1.39732 | -3.19533 | C | 0.145432 | 0.982059 | -2.85218 |
| H | -3.22888 | -2.05555 | -4.59918 | H | -0.44786 | 0.082131 | -2.98495 |
| H | -3.42334 | -2.80492 | -3.00523 | C | 1.901233 | 3.715252 | -4.90494 |
| C | -4.24682 | -3.0828  | 0.442673 | H | 1.789999 | 4.772985 | -4.62396 |
| C | 2.885837 | 4.581424 | 1.034178 | C | -0.78555 | -5.00411 | -4.69957 |
| H | 2.099184 | 4.696436 | 1.778039 | H | -1.70396 | -5.05878 | -4.10173 |

|   |          |          |          |   |          |          |          |
|---|----------|----------|----------|---|----------|----------|----------|
| C | -4.801   | -0.52544 | 1.915036 | H | -0.77684 | -5.86247 | -5.37895 |
| H | -4.93102 | -1.08142 | 2.851103 | H | -0.82251 | -4.09188 | -5.30992 |
| H | -3.73153 | -0.33749 | 1.776406 |   |          |          |          |

**Table S11.** Optimized Cartesian Coordinates of  $4^{3+}$ .

|    |          |          |          |   |          |          |          |
|----|----------|----------|----------|---|----------|----------|----------|
| Ru | -0.06938 | -0.20967 | 0.311643 | H | -4.83411 | 1.913754 | 2.308147 |
| Fe | -4.927   | -0.21191 | -1.32071 | H | -6.48175 | 1.285058 | 2.145606 |
| Fe | 5.054337 | -0.16996 | 1.218291 | C | 7.627959 | -2.92954 | -1.33236 |
| P  | 5.454267 | -1.11763 | -0.82861 | H | 6.932642 | -3.73301 | -1.09851 |
| P  | -5.46739 | 1.694614 | -0.07423 | C | 6.065953 | -1.72042 | 2.32546  |
| P  | 5.163328 | 1.802665 | 0.061186 | C | 2.852066 | 5.513067 | 1.757587 |
| P  | -5.63337 | -1.32294 | 0.593813 | H | 2.329204 | 6.369432 | 2.173253 |
| N  | 3.153799 | -0.20005 | 0.891753 | C | -1.31755 | 2.164512 | 1.79834  |
| N  | -3.14874 | -0.19055 | -0.6147  | H | -1.90183 | 2.200449 | 0.882876 |
| N  | -0.37691 | 1.181427 | 1.881665 | C | -5.20971 | -5.44418 | 0.681899 |
| N  | -0.26647 | -1.78821 | 1.720273 | H | -5.85423 | -6.30985 | 0.570938 |
| C  | 1.975878 | -0.21936 | 0.712575 | C | 0.529015 | -3.41677 | -3.42054 |
| N  | 0.245923 | -1.61584 | -1.24386 | C | -8.25549 | 2.190538 | 0.323108 |
| N  | 0.297054 | 1.41084  | -1.00617 | H | -8.25547 | 1.348921 | 1.012924 |
| C  | -0.59616 | -2.67216 | -1.4056  | C | -0.95334 | 4.048038 | 5.107278 |
| H  | -1.38489 | -2.77402 | -0.66598 | H | -0.22729 | 3.825125 | 5.900849 |
| C  | 0.997948 | 3.547107 | -2.74304 | C | -2.85148 | -0.50344 | -3.80654 |
| C  | 1.259817 | -1.48045 | -2.14434 | H | -2.50875 | 0.537708 | -3.83978 |
| H  | 1.947797 | -0.65855 | -1.97352 | H | -2.79309 | -0.90119 | -4.82812 |
| C  | -6.50275 | -0.14538 | -2.87656 | H | -2.15941 | -1.08665 | -3.18335 |
| C  | 0.52612  | -3.90201 | 2.585003 | C | -5.13686 | 1.786854 | -3.95426 |
| H  | 1.195189 | -4.74891 | 2.458245 | H | -5.81038 | 2.503117 | -3.46881 |
| C  | 4.303385 | 1.389602 | -1.5806  | H | -5.41349 | 1.751131 | -5.01624 |
| H  | 3.254741 | 1.204636 | -1.31489 | H | -4.11724 | 2.182985 | -3.89654 |
| H  | 4.31981  | 2.245817 | -2.26702 | C | -5.25907 | 0.428234 | -3.34688 |
| C  | 3.298328 | 3.124152 | 1.731773 | C | 3.14062  | -5.04329 | -1.92396 |
| H  | 3.114978 | 2.12011  | 2.111675 | H | 2.651812 | -5.98697 | -2.14876 |
| C  | 4.245403 | 3.304367 | 0.711613 | C | 8.240609 | 3.518419 | -2.20868 |
| C  | 0.287488 | 2.42223  | -3.20324 | H | 8.417562 | 3.788792 | -3.24484 |
| H  | -0.00928 | 2.337526 | -4.24417 | C | -4.17005 | -3.11606 | -2.5872  |
| C  | -8.45153 | -1.12141 | 0.185073 | H | -3.2466  | -3.00929 | -2.00499 |
| H  | -8.20953 | -0.7064  | -0.78878 | H | -3.89866 | -3.54282 | -3.56289 |
| C  | 0.969192 | 2.503205 | -0.55005 | H | -4.81246 | -3.8362  | -2.07014 |
| H  | 1.236228 | 2.508519 | 0.498896 | C | -10.1125 | -1.76435 | 1.834317 |
| C  | 1.410054 | -2.33528 | -3.23236 | H | -11.1503 | -1.87326 | 2.131271 |
| H  | 2.225613 | -2.16832 | -3.93129 | C | 0.690842 | 4.760045 | -4.96883 |
| C  | 2.946912 | -4.42944 | -0.6789  | H | 0.987626 | 5.660847 | -5.51461 |
| H  | 2.302076 | -4.90368 | 0.058488 | H | -0.39723 | 4.797431 | -4.8288  |
| C  | -2.01781 | -0.19269 | -0.20847 | H | 0.930846 | 3.901797 | -5.61068 |
| C  | -4.93304 | -0.23455 | 1.967517 | C | -8.32863 | 4.362229 | -1.45028 |

|   |          |          |          |   |          |          |          |
|---|----------|----------|----------|---|----------|----------|----------|
| H | -5.23506 | -0.63353 | 2.942414 | H | -8.35267 | 5.209811 | -2.12716 |
| H | -3.84181 | -0.2675  | 1.888907 | C | 8.985416 | 3.420354 | 0.097309 |
| C | 1.442195 | 4.684102 | -3.63734 | H | 9.739302 | 3.61597  | 0.852869 |
| H | 1.273451 | 5.620068 | -3.0833  | C | 9.873471 | -2.23239 | -1.95225 |
| C | 3.61993  | -3.23789 | -0.36847 | H | 10.90277 | -2.48078 | -2.18906 |
| H | 3.499686 | -2.7557  | 0.601815 | C | -0.70486 | 5.485631 | 4.614257 |
| C | -4.85048 | -1.80086 | -2.76433 | H | -1.42694 | 5.766065 | 3.835192 |
| C | -4.92819 | -3.03135 | 0.774669 | H | 0.305196 | 5.607505 | 4.204933 |
| C | -1.08834 | -1.69918 | 2.800806 | H | -0.82105 | 6.191745 | 5.442702 |
| H | -1.70858 | -0.81022 | 2.859613 | C | 0.646258 | -4.29166 | -4.64683 |
| C | -1.13165 | -2.67253 | 3.797692 | H | 1.71684  | -4.38756 | -4.88313 |
| H | -1.80169 | -2.54268 | 4.642215 | C | -7.84074 | 0.513477 | -2.97619 |
| C | -6.22999 | -1.50294 | -2.50586 | H | -8.65287 | -0.19419 | -2.78448 |
| H | -6.95773 | -2.21466 | -2.13094 | H | -7.98283 | 0.894323 | -3.99522 |
| C | 7.198481 | -1.58976 | -1.33982 | H | -7.95609 | 1.368237 | -2.29804 |
| C | -3.22231 | 3.048645 | -1.20764 | C | -4.33539 | 4.190321 | 0.629451 |
| H | -3.11923 | 2.179142 | -1.8549  | H | -5.13456 | 4.238486 | 1.367776 |
| C | 0.530423 | -2.89055 | 1.628154 | C | -2.45811 | 5.243786 | -0.49558 |
| H | 1.190575 | -2.93187 | 0.76709  | H | -1.78564 | 6.087881 | -0.61119 |
| C | -7.42566 | -1.49463 | 1.06467  | C | 8.958964 | -3.2473  | -1.63648 |
| C | 1.325172 | 3.56575  | -1.37411 | H | 9.278568 | -4.28452 | -1.62925 |
| H | 1.870082 | 4.403214 | -0.941   | C | 9.229531 | 3.753894 | -1.2431  |
| C | -1.52436 | 3.092558 | 2.815559 | H | 10.17496 | 4.202691 | -1.52935 |
| H | -2.29038 | 3.851036 | 2.675202 | C | 3.996357 | -4.45449 | -2.86834 |
| C | -0.74968 | 3.049378 | 3.991321 | H | 4.16843  | -4.93975 | -3.8248  |
| C | -0.31086 | -3.81155 | 3.713937 | C | 0.049934 | -5.69167 | -4.47211 |
| C | -0.47834 | -3.58225 | -2.45411 | H | 0.447256 | -6.20419 | -3.58777 |
| H | -1.17556 | -4.4135  | -2.50842 | H | 0.27535  | -6.30637 | -5.34901 |
| C | 0.218337 | 2.032976 | 4.066833 | H | -1.04464 | -5.64913 | -4.38428 |
| H | 0.853338 | 1.940364 | 4.943842 | C | -9.46576 | 2.850569 | 0.070728 |
| C | -3.54903 | -3.20233 | 0.978808 | H | -10.3701 | 2.523569 | 0.574073 |
| H | -2.8955  | -2.338   | 1.080081 | C | -0.34815 | -4.89733 | 4.76356  |
| C | 8.122504 | -0.57594 | -1.65112 | H | -0.95486 | -4.53568 | 5.604995 |
| H | 7.830503 | 0.472709 | -1.63474 | C | -9.50645 | 3.93267  | -0.82006 |
| C | -9.79381 | -1.25736 | 0.567824 | H | -10.4434 | 4.444448 | -1.01223 |
| H | -10.5836 | -0.96873 | -0.11892 | C | -7.74759 | -2.00882 | 2.337174 |
| C | -2.34934 | 4.136781 | -1.34797 | H | -6.96339 | -2.32717 | 3.022184 |
| H | -1.59165 | 4.119949 | -2.12736 | C | -3.45293 | 5.269863 | 0.495346 |
| C | -0.04681 | 1.393471 | -2.32005 | H | -3.55703 | 6.136309 | 1.141114 |
| H | -0.58875 | 0.51784  | -2.66026 | C | -1.02893 | -6.15462 | 4.185624 |
| C | -5.75954 | -4.15624 | 0.623342 | H | -2.04918 | -5.9401  | 3.844546 |
| H | -6.83051 | -4.03621 | 0.472908 | H | -1.08046 | -6.93914 | 4.947346 |
| C | 4.485555 | -2.65308 | -1.3048  | H | -0.4542  | -6.55097 | 3.336948 |
| C | 4.957539 | 0.144676 | -2.19293 | C | -9.08763 | -2.13888 | 2.719154 |

|   |          |          |          |   |          |          |          |
|---|----------|----------|----------|---|----------|----------|----------|
| H | 5.871452 | 0.405776 | -2.74031 | H | -9.334   | -2.53726 | 3.697622 |
| H | 4.286081 | -0.36001 | -2.89885 | C | -2.36976 | 3.921825 | 5.698943 |
| C | -7.07465 | 2.613534 | -0.3121  | H | -2.4908  | 4.617189 | 6.535698 |
| C | -4.21698 | 3.072368 | -0.21915 | H | -2.56713 | 2.908891 | 6.066709 |
| C | 4.504042 | 4.598117 | 0.224839 | H | -3.13127 | 4.172292 | 4.947673 |
| H | 5.268691 | 4.754981 | -0.53399 | C | -0.04204 | -3.56953 | -5.82658 |
| C | 7.018369 | 2.938803 | -1.83859 | H | -1.11427 | -3.44633 | -5.61382 |
| H | 6.26924  | 2.772795 | -2.61003 | H | 0.054871 | -4.16051 | -6.743   |
| C | -3.83333 | -5.61446 | 0.894416 | H | 0.391208 | -2.57888 | -6.00921 |
| H | -3.413   | -6.61375 | 0.949039 | C | 1.057089 | -5.23539 | 5.288182 |
| C | 4.859098 | -1.34064 | 2.994026 | H | 1.684215 | -5.67093 | 4.499157 |
| C | -4.25028 | -0.6038  | -3.30316 | H | 0.988074 | -5.97432 | 6.092802 |
| C | 2.6012   | 4.22409  | 2.251197 | H | 1.566441 | -4.34921 | 5.682995 |
| H | 1.879103 | 4.074382 | 3.052369 | C | 6.203629 | 0.535708 | 2.838704 |
| C | 3.806681 | 5.698585 | 0.744503 | H | 6.571465 | 1.54661  | 2.97139  |
| H | 4.024971 | 6.697283 | 0.379484 | C | 8.323725 | -0.51613 | 1.722505 |
| C | 2.962054 | 4.559735 | -3.88554 | H | 8.536289 | -1.32307 | 1.01224  |
| H | 3.184081 | 3.620309 | -4.41046 | H | 9.013109 | -0.63307 | 2.568473 |
| H | 3.528487 | 4.578055 | -2.94439 | H | 8.568296 | 0.428967 | 1.223106 |
| H | 3.311496 | 5.388256 | -4.51003 | C | 3.73184  | -2.23882 | 3.388743 |
| C | 6.776508 | 2.576221 | -0.50102 | H | 3.74065  | -2.41635 | 4.472663 |
| C | 4.945692 | 0.065449 | 3.327416 | H | 3.801165 | -3.21865 | 2.898766 |
| C | 6.907438 | -0.5437  | 2.202403 | H | 2.756643 | -1.79682 | 3.13354  |
| C | 7.765506 | 2.837129 | 0.463892 | C | 3.99213  | 0.807498 | 4.204888 |
| H | 7.58578  | 2.595881 | 1.50878  | H | 2.948882 | 0.570659 | 3.955681 |
| C | 9.449923 | -0.89581 | -1.96224 | H | 4.132251 | 1.892052 | 4.130372 |
| H | 10.15053 | -0.10232 | -2.20346 | H | 4.146427 | 0.527753 | 5.255568 |
| C | 4.663385 | -3.26137 | -2.56097 | C | 6.452461 | -3.11483 | 1.947829 |
| H | 5.353783 | -2.8284  | -3.28353 | H | 6.782965 | -3.6637  | 2.838957 |
| C | -7.11633 | 3.707382 | -1.19921 | H | 7.284264 | -3.12387 | 1.236242 |
| H | -6.20634 | 4.067815 | -1.67596 | H | 5.621069 | -3.67815 | 1.50505  |
| C | -3.00521 | -4.49226 | 1.047432 | C | 0.377071 | 1.132212 | 3.013603 |
| H | -1.938   | -4.62024 | 1.225453 | H | 1.118063 | 0.340514 | 3.055464 |
| C | -5.45686 | 1.191626 | 1.768228 |   |          |          |          |

**Table S12.** Optimized Cartesian Coordinates of  $5^{3+}$ .

|    |          |          |          |    |          |          |          |
|----|----------|----------|----------|----|----------|----------|----------|
| Ru | 0.000029 | -4.8E-05 | -0.00028 | Fe | 5.003243 | -0.05478 | 1.096501 |
| Fe | -5.00344 | 0.054843 | -1.09622 | P  | 5.314463 | 1.62985  | -0.45624 |
| P  | -5.31458 | -1.62975 | 0.456537 | P  | 5.672987 | -1.45128 | -0.63714 |
| P  | -5.67247 | 1.451303 | 0.637706 | N  | 0.080973 | -1.72887 | -1.26222 |
| N  | -0.08078 | 1.728818 | 1.261585 | N  | 3.196319 | -0.09677 | 0.504932 |
| N  | -3.19637 | 0.096705 | -0.50514 | N  | 0.151657 | 1.36017  | -1.64222 |
| N  | -0.15167 | -1.36033 | 1.641573 | C  | 6.064756 | 0.961381 | 2.729976 |
| C  | -6.06551 | -0.96126 | -2.72941 | C  | 2.024498 | -0.06928 | 0.257785 |
| C  | -2.0245  | 0.069195 | -0.25825 | C  | -0.4136  | 3.485727 | -2.64357 |

|   |          |          |          |   |          |          |          |
|---|----------|----------|----------|---|----------|----------|----------|
| C | 0.413388 | -3.48598 | 2.642855 | H | -0.93839 | 4.433852 | -2.55199 |
| H | 0.938113 | -4.43414 | 2.551264 | C | 0.321882 | 3.201185 | -3.80617 |
| C | -0.32204 | -3.2014  | 3.805482 | C | -0.99248 | -2.56296 | -1.33964 |
| C | 0.992678 | 2.562937 | 1.338779 | H | -1.882   | -2.26557 | -0.79574 |
| H | 1.882108 | 2.265545 | 0.794724 | C | 0.167201 | -4.13518 | -2.7822  |
| C | -0.16669 | 4.135136 | 2.781595 | C | 0.852401 | 1.069714 | -2.77152 |
| C | -0.85238 | -1.06985 | 2.770891 | H | 1.330801 | 0.100303 | -2.81028 |
| H | -1.33067 | -0.10039 | 2.8097   | C | 7.016131 | 2.258656 | -0.90641 |
| C | -7.01622 | -2.2582  | 0.907273 | C | -0.48054 | 2.563064 | -1.59985 |
| C | 0.480407 | -2.56329 | 1.599163 | H | -1.05155 | 2.780215 | -0.70327 |
| H | 1.051389 | -2.78045 | 0.702559 | C | 1.270256 | -3.26633 | -2.7067  |
| C | -1.26975 | 3.266285 | 2.706329 | H | 2.195905 | -3.50299 | -3.2243  |
| H | -2.19529 | 3.502926 | 3.22414  | C | 4.341402 | 3.225229 | -0.3598  |
| C | -4.3419  | -3.22533 | 0.359475 | C | 6.644813 | -0.32943 | 2.498793 |
| C | -6.64528 | 0.329671 | -2.49815 | C | 4.741141 | 0.833791 | -2.07572 |
| C | -4.74041 | -0.83395 | 2.075834 | H | 4.925239 | 1.52613  | -2.90733 |
| H | -4.92429 | -1.52628 | 2.907503 | H | 3.661561 | 0.662743 | -1.98551 |
| H | -3.66083 | -0.66314 | 1.985181 | C | 1.204203 | -2.10902 | -1.93693 |
| C | -1.20387 | 2.108986 | 1.936522 | H | 2.084239 | -1.48579 | -1.8103  |
| H | -2.08395 | 1.485786 | 1.810052 | C | 8.152129 | 1.649417 | -0.35587 |
| C | -8.15232 | -1.64908 | 0.356798 | H | 8.033639 | 0.827074 | 0.344446 |
| H | -8.03397 | -0.82691 | -0.34375 | C | 4.665154 | 0.781383 | 3.016929 |
| C | -4.66595 | -0.78154 | -3.01667 | C | 4.398219 | -0.63881 | 3.051096 |
| C | -4.39875 | 0.638613 | -3.05097 | C | 5.609629 | -1.32561 | 2.714303 |
| C | -5.60997 | 1.325644 | -2.71396 | C | 4.637038 | -2.99563 | -0.88861 |
| C | -4.63643 | 2.995671 | 0.888699 | C | 3.684299 | -3.3783  | 0.066886 |
| C | -3.68397 | 3.378137 | -0.06716 | H | 3.473204 | -2.71047 | 0.901712 |
| H | -3.47314 | 2.710137 | -0.90191 | C | 4.801641 | 4.228462 | 0.515917 |
| C | -4.80294 | -4.22851 | -0.51587 | H | 5.698578 | 4.062204 | 1.108094 |
| H | -5.70038 | -4.06219 | -1.10726 | C | 7.395735 | -2.19134 | -0.74755 |
| C | -7.39516 | 2.191384 | 0.748601 | C | 0.955266 | 1.944049 | -3.85042 |
| C | -0.95532 | -1.94421 | 3.849758 | H | 1.529811 | 1.64104  | -4.72091 |
| H | -1.52986 | -1.64117 | 4.72025  | C | -0.97762 | -3.75302 | -2.06336 |
| C | 0.977961 | 3.752997 | 2.062479 | H | -1.87354 | -4.36948 | -2.05513 |
| H | 1.87388  | 4.369457 | 2.054041 | C | 3.224586 | 3.484868 | -1.17163 |
| C | -3.22437 | -3.48503 | 1.170313 | H | 2.856793 | 2.738625 | -1.87546 |
| H | -2.85596 | -2.73883 | 1.873856 | C | 6.812804 | 2.251753 | 2.834184 |
| C | -6.81381 | -2.2515  | -2.83348 | H | 6.132696 | 3.095086 | 2.99116  |
| H | -6.13387 | -3.09497 | -2.99044 | H | 7.478488 | 2.211577 | 3.706024 |
| H | -7.47952 | -2.21124 | -3.7053  | H | 7.442976 | 2.463218 | 1.962845 |
| H | -7.44397 | -2.4628  | -1.9621  | C | 5.495011 | -0.4831  | -2.27783 |
| C | -5.4939  | 0.48312  | 2.278314 | H | 4.984403 | -1.128   | -3.00259 |
| H | -4.9828  | 1.127913 | 3.002819 | H | 6.502739 | -0.28905 | -2.66231 |
| H | -6.50148 | 0.289275 | 2.663298 | C | 8.104945 | -0.63592 | 2.36754  |



|   |          |          |          |   |          |          |          |
|---|----------|----------|----------|---|----------|----------|----------|
| C | -8.10531 | 0.63648  | -2.36648 | H | 8.708072 | 0.276782 | 2.312007 |
| H | -8.70867 | -0.2761  | -2.31148 | H | 8.445308 | -1.1904  | 3.251854 |
| H | -8.44566 | 1.19168  | -3.25034 | H | 8.337907 | -1.25808 | 1.493021 |
| H | -8.33797 | 1.258092 | -1.49149 | C | 3.038345 | 5.722037 | -0.22874 |
| C | -3.03896 | -5.72212 | 0.227068 | H | 2.549269 | 6.690737 | -0.19433 |
| H | -2.5499  | -6.69081 | 0.192149 | C | 5.864814 | -2.79515 | 2.805651 |
| C | -5.86495 | 2.795219 | -2.80531 | H | 6.759538 | -3.07809 | 2.241449 |
| H | -6.75926 | 3.078386 | -2.24056 | H | 6.043769 | -3.07343 | 3.852761 |
| H | -6.04453 | 3.07342  | -3.85234 | H | 5.026691 | -3.40236 | 2.445135 |
| H | -5.02649 | 3.402318 | -2.44541 | C | 4.153238 | 5.467347 | 0.58582  |
| C | -4.1546  | -5.46739 | -0.58646 | H | 4.533937 | 6.238997 | 1.247584 |
| H | -4.53588 | -6.23898 | -1.24796 | C | 7.63737  | -3.46911 | -0.20578 |
| C | -7.63701 | 3.469114 | 0.20683  | H | 6.818717 | -4.06229 | 0.19725  |
| H | -6.8185  | 4.062306 | -0.19648 | C | 2.581113 | 4.731134 | -1.10635 |
| C | -2.58096 | -4.73129 | 1.104357 | H | 1.734486 | 4.928928 | -1.75871 |
| H | -1.7337  | -4.92911 | 1.755905 | C | 3.026471 | -4.61233 | -0.05155 |
| C | -3.02606 | 4.612168 | 0.05084  | H | 2.308637 | -4.92297 | 0.704349 |
| H | -2.30848 | 4.922641 | -0.70537 | C | 0.395597 | 4.174167 | -4.95898 |
| C | -0.39601 | -4.17441 | 4.958252 | H | -0.02762 | 5.131126 | -4.62179 |
| H | 0.02821  | -5.13107 | 4.621449 | C | 3.106526 | -1.26723 | 3.454976 |
| C | -3.10705 | 1.266791 | -3.45522 | H | 3.089623 | -2.33874 | 3.220024 |
| H | -3.08984 | 2.338265 | -3.22013 | H | 2.961263 | -1.16682 | 4.538764 |
| H | -2.9622  | 1.166494 | -4.53907 | H | 2.247338 | -0.79501 | 2.959325 |
| H | -2.24778 | 0.794325 | -2.95993 | C | 8.46659  | -1.47321 | -1.30787 |
| C | -8.46583 | 1.473225 | 1.309248 | H | 8.319251 | -0.48797 | -1.74393 |
| H | -8.31832 | 0.488002 | 1.745292 | C | 3.691113 | 1.859421 | 3.356521 |
| C | -3.69218 | -1.85979 | -3.35637 | H | 2.658567 | 1.514326 | 3.224398 |
| H | -2.65954 | -1.51486 | -3.22454 | H | 3.804601 | 2.180169 | 4.400863 |
| H | -3.80597 | -2.18063 | -4.40066 | H | 3.831824 | 2.743429 | 2.719141 |
| H | -3.83291 | -2.7437  | -2.71887 | C | 4.245214 | -5.0727  | -2.09967 |
| C | -4.24418 | 5.072956 | 2.09924  | H | 4.479377 | -5.73372 | -2.92833 |
| H | -4.47808 | 5.73413  | 2.92785  | C | 4.907095 | -3.84372 | -1.98015 |
| C | -4.90614 | 3.843972 | 1.980151 | H | 5.66999  | -3.57342 | -2.70859 |
| H | -5.66884 | 3.573831 | 2.70887  | C | 7.16557  | 3.316804 | -1.82268 |
| C | -7.16551 | -3.31607 | 1.823904 | H | 6.290955 | 3.808939 | -2.24558 |
| H | -6.29081 | -3.8081  | 2.246757 | C | 9.43482  | 2.089772 | -0.7128  |
| C | -9.43495 | -2.08931 | 0.714128 | H | 10.30952 | 1.613824 | -0.27815 |
| H | -10.3097 | -1.61348 | 0.279521 | C | 0.203692 | -5.38609 | -3.62673 |
| C | -0.203   | 5.386019 | 3.626178 | H | 1.257364 | -5.61271 | -3.84741 |
| H | -1.25663 | 5.612676 | 3.847031 | C | 3.310974 | -5.46368 | -1.12722 |
| C | -3.31021 | 5.463717 | 1.126445 | H | 2.823292 | -6.43108 | -1.20271 |
| H | -2.82246 | 6.431112 | 1.201621 | C | 9.582426 | 3.142948 | -1.62519 |
| C | -9.58239 | -3.1422  | 1.626869 | H | 10.57296 | 3.490228 | -1.90009 |
| H | -10.5729 | -3.48937 | 1.902073 | C | 8.44642  | 3.753904 | -2.18111 |

|   |          |          |          |   |          |          |          |
|---|----------|----------|----------|---|----------|----------|----------|
| C | -8.44629 | -3.75302 | 2.182741 | H | 8.56118  | 4.570726 | -2.88609 |
| H | -8.56093 | -4.56962 | 2.887996 | C | 9.759562 | -2.01505 | -1.31288 |
| C | -9.75883 | 2.015011 | 1.314612 | H | 10.57434 | -1.45213 | -1.75746 |
| H | -10.5735 | 1.452075 | 1.759443 | C | 9.997197 | -3.27881 | -0.75584 |
| C | -9.99667 | 3.278743 | 0.757596 | H | 10.99783 | -3.69783 | -0.76053 |
| H | -10.9973 | 3.697731 | 0.762557 | C | -0.52062 | -5.1149  | -4.96226 |
| C | 0.5215   | 5.114701 | 4.961579 | H | -0.06685 | -4.27946 | -5.50732 |
| H | 0.067811 | 4.279198 | 5.506612 | H | -0.48347 | -6.0029  | -5.6017  |
| H | 0.484437 | 6.002628 | 5.601113 | H | -1.57719 | -4.87315 | -4.78015 |
| H | 1.578039 | 4.872976 | 4.779284 | C | -0.42149 | -6.59511 | -2.91545 |
| C | 0.422118 | 6.595043 | 2.914864 | H | -1.50529 | -6.46513 | -2.791   |
| H | 1.505879 | 6.464974 | 2.790109 | H | -0.27111 | -7.50104 | -3.51127 |
| H | 0.271996 | 7.500925 | 3.510829 | H | 0.01914  | -6.75739 | -1.92375 |
| H | -0.01876 | 6.757477 | 1.923311 | C | 8.930477 | -4.00697 | -0.20851 |
| C | -8.93013 | 4.006919 | 0.209915 | H | 9.102648 | -4.9946  | 0.206896 |
| H | -9.10247 | 4.994522 | -0.20548 | C | -0.46192 | 3.655795 | -6.13129 |
| C | 0.459955 | -3.65548 | 6.131423 | H | -1.50678 | 3.508252 | -5.8336  |
| H | 1.505108 | -3.50766 | 5.834914 | H | -0.43971 | 4.370743 | -6.95998 |
| H | 0.437037 | -4.37025 | 6.960234 | H | -0.07167 | 2.699261 | -6.50346 |
| H | 0.068988 | -2.699   | 6.502958 | C | 1.843526 | 4.416941 | -5.41555 |
| C | -1.84425 | -4.41821 | 5.413341 | H | 2.28171  | 3.507989 | -5.84781 |
| H | -2.28356 | -3.50949 | 5.844953 | H | 1.866198 | 5.187663 | -6.19245 |
| H | -1.86717 | -5.18882 | 6.190353 | H | 2.482982 | 4.748901 | -4.58838 |
| H | -2.48258 | -4.75078 | 4.585549 |   |          |          |          |

**Table S13.** Optimized Cartesian Coordinates of  $\mathbf{1}^{4+}$ .

|    |          |          |          |   |          |          |          |
|----|----------|----------|----------|---|----------|----------|----------|
| Ru | -0.01594 | 0.137377 | 0.680754 | C | -10.2693 | 2.336529 | -0.3109  |
| Fe | -5.07392 | -0.59053 | 0.782151 | H | -11.3252 | 2.581193 | -0.27051 |
| Fe | 5.08036  | 0.548616 | 0.969293 | C | 3.301184 | -3.8763  | 2.49202  |
| P  | -5.73397 | 1.260791 | -0.46944 | H | 2.661942 | -3.73849 | 3.361326 |
| P  | 5.404018 | -1.45581 | -0.13477 | C | 8.145331 | -2.02768 | 0.264192 |
| P  | -5.12057 | -1.66927 | -1.26265 | H | 7.970772 | -1.74996 | 1.300455 |
| P  | 5.37161  | 1.453599 | -1.15346 | C | 3.405236 | 4.515169 | -3.11373 |
| N  | -0.12997 | 1.450675 | -0.98485 | H | 3.417336 | 4.946749 | -4.11006 |
| N  | -0.26578 | 1.778025 | 2.004997 | C | 1.134942 | -2.5032  | -0.32332 |
| N  | 3.19466  | 0.412449 | 0.782676 | H | 1.656708 | -2.41411 | 0.62348  |
| N  | 0.24967  | -1.51376 | -0.63065 | C | 7.014373 | 0.961767 | 1.699076 |
| N  | 0.092437 | -1.1626  | 2.365932 | H | 7.936276 | 0.81202  | 1.153291 |
| N  | -3.21179 | -0.26047 | 0.604484 | C | -1.17358 | 2.318343 | -1.12407 |
| C  | -2.02537 | -0.11092 | 0.618281 | H | -1.88643 | 2.361198 | -0.30511 |
| C  | -4.06011 | 2.906269 | 1.145626 | C | -8.47308 | 0.897613 | -1.09097 |
| H  | -3.95233 | 2.038152 | 1.793044 | H | -8.16043 | 0.01734  | -1.65272 |
| C  | -3.42959 | 4.113168 | 1.480546 | C | 7.300776 | 3.501537 | -1.49787 |
| H  | -2.8486  | 4.180611 | 2.397443 | H | 6.497021 | 4.197287 | -1.2628  |

|   |          |          |          |   |          |          |          |
|---|----------|----------|----------|---|----------|----------|----------|
| C | 4.67815  | -2.93422 | 0.728528 | C | -9.83563 | 1.214713 | -1.03378 |
| C | -7.53655 | 1.715573 | -0.43004 | H | -10.5552 | 0.590238 | -1.55324 |
| C | 2.00149  | 0.343826 | 0.745822 | C | 0.873354 | -0.85932 | 3.442123 |
| C | 3.438858 | 3.445823 | -0.51698 | H | 1.451433 | 0.056989 | 3.371833 |
| H | 3.465372 | 3.034712 | 0.490426 | C | -2.27199 | -4.57866 | -0.46204 |
| C | 4.2124   | 2.858441 | -1.52926 | H | -1.58261 | -4.82703 | 0.341646 |
| C | -4.09114 | -3.98508 | -2.52068 | C | -7.97068 | 2.835316 | 0.303324 |
| H | -4.81884 | -3.78274 | -3.30442 | H | -7.2579  | 3.476781 | 0.818105 |
| C | -0.42422 | -1.62255 | -1.80588 | C | 6.377486 | 0.02399  | 2.594076 |
| H | -1.13332 | -0.83141 | -2.02839 | H | 6.717928 | -0.97312 | 2.838609 |
| C | 2.652685 | 4.571248 | -0.80336 | C | 1.027124 | -4.84043 | -3.33338 |
| H | 2.078545 | 5.051885 | -0.01598 | H | 0.964828 | -5.7654  | -2.73848 |
| C | 2.637152 | 5.106571 | -2.09775 | C | -6.00526 | -2.21183 | 1.813435 |
| H | 2.055449 | 5.998972 | -2.30658 | H | -6.05984 | -3.2356  | 1.468481 |
| C | 4.448796 | -1.17479 | -1.73707 | C | -6.95646 | -1.15656 | 1.54655  |
| H | 4.511474 | -2.05498 | -2.38856 | H | -7.87013 | -1.23952 | 0.973895 |
| H | 3.398704 | -1.06052 | -1.43974 | C | -9.33697 | 3.143286 | 0.356888 |
| C | -5.32027 | 0.914591 | -2.29404 | H | -9.67141 | 4.012449 | 0.913085 |
| H | -6.27132 | 0.81502  | -2.82941 | C | -4.33382 | 5.151938 | -0.52177 |
| H | -4.80047 | 1.793071 | -2.69095 | H | -4.46491 | 6.026022 | -1.15119 |
| C | 1.378325 | -3.58081 | -1.16739 | C | -7.58557 | -3.05165 | -1.27668 |
| H | 2.097197 | -4.33583 | -0.85475 | H | -7.30396 | -3.39688 | -0.28462 |
| C | -0.22292 | -2.67606 | -2.69898 | C | -7.09761 | -1.82582 | -3.31947 |
| H | -0.79845 | -2.70029 | -3.61841 | H | -6.44981 | -1.19981 | -3.92885 |
| C | -4.00166 | -3.15009 | -1.39235 | C | 3.60138  | -5.16865 | 2.035588 |
| C | 4.989201 | -4.22939 | 0.274479 | H | 3.201576 | -6.03568 | 2.552066 |
| H | 5.671579 | -4.37442 | -0.56117 | C | 4.447061 | -5.34448 | 0.928631 |
| C | -4.82278 | 2.820153 | -0.02894 | H | 4.70206  | -6.34393 | 0.592281 |
| C | 0.672271 | 2.173883 | -3.15132 | C | -8.31189 | -2.26262 | -3.86723 |
| H | 1.427895 | 2.070372 | -3.92345 | H | -8.58461 | -1.96914 | -4.87535 |
| C | 8.626274 | -2.83176 | -2.37819 | C | 2.484461 | -4.7039  | -3.82884 |
| H | 8.807706 | -3.15627 | -3.39734 | H | 2.600972 | -3.78132 | -4.41319 |
| C | -3.09796 | -3.45202 | -0.36031 | H | 2.739667 | -5.54735 | -4.47782 |
| H | -3.05685 | -2.81173 | 0.519289 | H | 3.20292  | -4.68835 | -2.99871 |
| C | -1.34123 | 3.106978 | -2.25853 | C | 0.914712 | -1.65216 | 4.586502 |
| H | -2.20386 | 3.767917 | -2.31356 | H | 1.539219 | -1.35106 | 5.423631 |
| C | 0.705321 | -3.6905  | -2.40207 | C | -0.65582 | 3.862638 | -4.57595 |
| C | 9.668984 | -2.84701 | -1.44041 | H | -1.72606 | 3.777494 | -4.81934 |
| H | 10.65909 | -3.17833 | -1.73427 | C | 8.110318 | 1.234845 | -1.88841 |
| C | 7.059648 | 2.115744 | -1.56935 | H | 7.954468 | 0.15802  | -1.938   |
| C | -6.5255  | 0.011464 | 2.277246 | C | -0.64395 | -2.30533 | 2.433069 |
| H | -7.04243 | 0.96202  | 2.303488 | H | -1.24154 | -2.53796 | 1.556645 |
| C | 7.101418 | -1.98863 | -0.67824 | C | -8.79682 | -3.48772 | -1.82729 |
| C | -5.3051  | -0.30737 | 2.945161 | H | -9.44489 | -4.14445 | -1.25694 |

|   |          |          |          |   |          |          |          |
|---|----------|----------|----------|---|----------|----------|----------|
| H | -4.72357 | 0.366669 | 3.558719 | C | 0.156122 | 3.399143 | -5.78837 |
| C | 0.363743 | 3.994702 | 2.724432 | H | 1.231584 | 3.561356 | -5.63054 |
| H | 0.950537 | 4.892103 | 2.542904 | H | -0.12754 | 3.980722 | -6.67059 |
| C | 0.788789 | 1.413108 | -1.98783 | H | -0.00636 | 2.340039 | -6.02013 |
| H | 1.623114 | 0.732606 | -1.84741 | C | -9.16678 | -3.0853  | -3.11991 |
| C | -1.07999 | 1.698299 | 3.092566 | H | -10.1046 | -3.42419 | -3.54658 |
| H | -1.63128 | 0.769723 | 3.210205 | C | -0.54353 | 5.082994 | 4.825051 |
| C | -3.5626  | 5.233866 | 0.649346 | H | 0.453014 | 5.545328 | 4.874406 |
| H | -3.09095 | 6.172754 | 0.921938 | C | 8.583493 | 3.99994  | -1.75964 |
| C | -4.45552 | -0.34133 | -2.42186 | H | 8.765395 | 5.068365 | -1.71469 |
| H | -3.43061 | -0.14376 | -2.08587 | C | 0.134307 | -2.82316 | 4.676961 |
| H | -4.41298 | -0.71082 | -3.45341 | C | -0.36852 | 5.351997 | -4.28653 |
| C | -3.26371 | -5.11175 | -2.61708 | H | -0.91003 | 5.717593 | -3.40584 |
| H | -3.34983 | -5.77134 | -3.47482 | H | -0.66166 | 5.963359 | -5.14552 |
| C | 5.139997 | 1.989296 | 2.616157 | H | 0.706325 | 5.501559 | -4.12095 |
| H | 4.366885 | 2.711644 | 2.840219 | C | -0.64569 | -3.14205 | 3.548726 |
| C | 3.842981 | -2.75846 | 1.844301 | H | -1.26603 | -4.03322 | 3.540416 |
| H | 3.614858 | -1.75583 | 2.204562 | C | 0.081272 | -4.96171 | -4.5301  |
| C | -2.3536  | -5.40747 | -1.5906  | H | -0.96874 | -5.04597 | -4.22151 |
| H | -1.73466 | -6.29731 | -1.6591  | H | 0.330516 | -5.85292 | -5.11373 |
| C | -4.98545 | -1.67716 | 2.661224 | H | 0.179073 | -4.09844 | -5.20205 |
| H | -4.11115 | -2.20737 | 3.013849 | C | 9.628106 | 3.123215 | -2.08671 |
| C | 0.436789 | 2.931826 | 1.828421 | H | 10.61891 | 3.513089 | -2.29332 |
| H | 1.060296 | 2.977426 | 0.940323 | C | 9.388763 | 1.742591 | -2.15159 |
| C | 4.988021 | 0.085029 | -2.42363 | H | 10.19412 | 1.062671 | -2.40966 |
| H | 4.262111 | 0.491378 | -3.13696 | C | -1.51584 | 6.131032 | 4.236124 |
| H | 5.915669 | -0.11933 | -2.97081 | H | -1.21838 | 6.446888 | 3.227797 |
| C | 9.424095 | -2.45308 | -0.11609 | H | -1.54022 | 7.018632 | 4.875375 |
| H | 10.22321 | -2.48587 | 0.616619 | H | -2.53637 | 5.724448 | 4.194004 |
| C | 4.19677  | 3.394894 | -2.83145 | C | -1.08344 | -4.50695 | 6.155239 |
| H | 4.829983 | 2.974873 | -3.61165 | H | -1.98318 | -3.88064 | 6.157086 |
| C | -0.42528 | 3.035759 | -3.32838 | H | -1.02386 | -5.00642 | 7.126584 |
| C | -6.73566 | -2.20554 | -2.01338 | H | -1.20343 | -5.29532 | 5.400135 |
| C | 7.344564 | -2.40845 | -1.99985 | C | 1.412411 | -4.63111 | 5.812461 |
| H | 6.553907 | -2.41843 | -2.74688 | H | 1.307815 | -5.29771 | 4.943951 |
| C | 5.219442 | 0.656782 | 3.141922 | H | 1.476272 | -5.25724 | 6.707458 |
| H | 4.516747 | 0.202122 | 3.826734 | H | 2.354891 | -4.07584 | 5.723743 |
| C | 6.251801 | 2.188997 | 1.742485 | C | 0.19066  | -3.68982 | 5.914563 |
| H | 6.493202 | 3.098235 | 1.207698 | C | -0.97851 | 4.699691 | 6.242948 |
| C | -1.19028 | 2.72474  | 4.031079 | H | -2.02521 | 4.367931 | 6.265316 |
| H | -1.8358  | 2.587323 | 4.892613 | H | -0.91029 | 5.572125 | 6.899321 |
| C | -4.96601 | 3.948723 | -0.86078 | H | -0.35112 | 3.909809 | 6.671305 |
| H | -5.59769 | 3.907526 | -1.74692 | H | 0.351577 | -3.02595 | 6.775864 |
| C | -0.45228 | 3.91282  | 3.87161  |   |          |          |          |

**Table S14.** Optimized Cartesian Coordinates of **2<sup>4+</sup>**.

|    |          |          |          |   |          |          |          |
|----|----------|----------|----------|---|----------|----------|----------|
| Ru | -0.06272 | -0.01874 | 0.418909 | H | -4.68269 | 0.294321 | 4.935322 |
| Fe | -5.13827 | 0.697401 | 0.777656 | H | -3.32641 | 0.373943 | 3.798789 |
| Fe | 5.003819 | -0.88744 | 0.602172 | C | 4.000649 | 3.885856 | 3.995993 |
| P  | -5.71962 | -1.36822 | -0.06332 | H | 3.628811 | 4.479154 | 4.8253   |
| P  | -5.46175 | 1.367227 | -1.41778 | C | 0.138215 | 0.529079 | -4.51319 |
| P  | 5.619284 | 1.330998 | 0.445309 | C | -5.20077 | -0.16455 | -2.522   |
| P  | 5.472418 | -0.86806 | -1.67334 | H | -6.14012 | -0.35536 | -3.05353 |
| N  | -0.17115 | -2.12602 | 0.145761 | H | -4.43956 | 0.0914   | -3.26746 |
| N  | -0.08209 | -0.27252 | 2.529646 | C | -5.22853 | 0.889002 | 2.955702 |
| N  | -0.02321 | 0.224883 | -1.69012 | C | -2.539   | 4.717328 | -2.82874 |
| N  | 3.148359 | -0.42824 | 0.444895 | H | -1.89872 | 5.530484 | -3.15606 |
| N  | 0.056866 | 2.087578 | 0.652368 | C | 1.040739 | -0.28586 | -3.80192 |
| N  | -3.27137 | 0.339958 | 0.530537 | H | 1.830678 | -0.83272 | -4.31149 |
| C  | 1.968835 | -0.22637 | 0.43796  | C | 2.767552 | -3.6474  | -4.2652  |
| C  | -2.08907 | 0.174121 | 0.452048 | H | 2.176463 | -4.32349 | -4.87434 |
| C  | -6.94589 | 1.507208 | 1.503815 | C | -7.47428 | -1.78352 | -0.51979 |
| H  | -7.88441 | 1.53311  | 0.965952 | C | -7.2961  | 3.476881 | -1.83587 |
| C  | 7.388841 | -2.76288 | -2.51265 | H | -6.46269 | 4.139591 | -1.60807 |
| H  | 6.562046 | -3.47147 | -2.5162  | C | 2.642364 | -3.66612 | -2.86849 |
| C  | -3.40912 | 3.306555 | -1.05033 | H | 1.947429 | -4.35328 | -2.39293 |
| H  | -3.42128 | 3.011524 | -0.00234 | C | -3.29982 | -3.98233 | 2.052942 |
| C  | -1.01758 | -1.04762 | 3.143995 | H | -2.23189 | -4.1357  | 2.203596 |
| H  | -1.75504 | -1.51761 | 2.500221 | C | -8.55016 | 4.028235 | -2.12612 |
| C  | -5.94589 | 2.549982 | 1.482639 | H | -8.68398 | 5.104481 | -2.10415 |
| H  | -6.00888 | 3.471697 | 0.920261 | C | -5.59975 | -4.63547 | 2.482477 |
| C  | 0.934274 | -0.41267 | -2.42261 | H | -6.31754 | -5.28851 | 2.967147 |
| H  | 1.622229 | -1.04576 | -1.87426 | C | 8.670525 | -3.20532 | -2.86152 |
| C  | 0.904605 | 4.234671 | -0.07339 | H | 8.831229 | -4.24853 | -3.11175 |
| H  | 1.518099 | 4.781866 | -0.78162 | C | 7.666575 | 3.039988 | -0.47795 |
| C  | 0.462869 | -4.36595 | 0.806868 | H | 6.864039 | 3.644229 | -0.89532 |
| H  | 1.012501 | -4.99427 | 1.501721 | C | 4.465492 | -1.91695 | -4.09478 |
| C  | -6.4995  | 0.495144 | 2.429112 | H | 5.200268 | -1.27155 | -4.57371 |
| H  | -7.02519 | -0.41005 | 2.707978 | C | 8.249553 | -0.49943 | -2.23714 |
| C  | -0.85294 | 1.174722 | -3.75245 | H | 8.118026 | 0.554222 | -1.99615 |
| H  | -1.58433 | 1.821342 | -4.23102 | C | -7.70964 | -2.6792  | -1.58165 |
| C  | -4.23938 | 2.654902 | -1.97579 | H | -6.88629 | -3.11998 | -2.13912 |
| C  | 0.203282 | 4.911166 | 0.942521 | C | -3.37046 | 4.066657 | -3.75524 |
| C  | -0.90921 | 1.006953 | -2.3666  | H | -3.37749 | 4.37896  | -4.79445 |
| H  | -1.66849 | 1.517209 | -1.77868 | C | -4.22599 | -4.82208 | 2.691958 |
| C  | 4.66336  | -2.71245 | 1.691951 | H | -3.88153 | -5.62146 | 3.340403 |
| H  | 3.73152  | -3.26296 | 1.674803 | C | -8.19921 | 1.242774 | -2.20517 |

|   |          |          |          |   |          |          |          |
|---|----------|----------|----------|---|----------|----------|----------|
| C | -5.12293 | -2.76934 | 1.000649 | H | -8.09269 | 0.159331 | -2.23876 |
| C | 7.39232  | 1.848514 | 0.222645 | C | -9.8733  | -1.63372 | -0.13448 |
| C | 4.756739 | 1.835905 | -1.15502 | H | -10.7083 | -1.23947 | 0.43481  |
| H | 3.684291 | 1.699031 | -0.98085 | C | 4.123922 | -1.1672  | 3.73599  |
| H | 4.938853 | 2.891549 | -1.38248 | H | 4.262153 | -0.08766 | 3.882923 |
| C | -0.88518 | -2.67147 | -0.8768  | H | 4.363907 | -1.6637  | 4.683993 |
| H | -1.39349 | -1.97133 | -1.53199 | H | 3.065342 | -1.3546  | 3.519159 |
| C | 5.243021 | 0.922299 | -2.28671 | C | 0.290005 | 6.405204 | 1.15314  |
| H | 6.202318 | 1.264308 | -2.69169 | H | -0.68259 | 6.743307 | 1.540388 |
| H | 4.519877 | 0.898077 | -3.11013 | C | -0.05973 | -0.80057 | 6.852417 |
| C | -0.11092 | -0.60465 | 5.355444 | H | 0.2764   | 0.145801 | 7.299864 |
| C | 7.173845 | -1.40541 | -2.20162 | C | -9.44957 | 1.803152 | -2.49697 |
| C | -0.28063 | -4.94059 | -0.24382 | H | -10.2788 | 1.154529 | -2.76018 |
| C | 0.849514 | 0.200114 | 4.709001 | C | -8.56343 | -1.2739  | 0.209336 |
| H | 1.608061 | 0.721357 | 5.28932  | H | -8.41062 | -0.59801 | 1.043679 |
| C | 0.807633 | 2.848707 | -0.18903 | C | 10.04401 | 2.737694 | -0.07624 |
| H | 1.33042  | 2.315026 | -0.97675 | H | 11.06641 | 3.081312 | -0.19098 |
| C | -0.96153 | -4.04618 | -1.0921  | C | -1.49301 | -6.96281 | 0.534757 |
| H | -1.55335 | -4.42474 | -1.92062 | H | -1.63086 | -8.03866 | 0.389324 |
| C | 4.971086 | 2.37523  | 1.837968 | H | -2.45742 | -6.46612 | 0.369805 |
| C | 0.495653 | -2.98221 | 0.969999 | H | -1.19224 | -6.80126 | 1.579845 |
| H | 1.05754  | -2.52528 | 1.779127 | C | 9.528276 | -0.94997 | -2.59166 |
| C | 6.298282 | -1.19434 | 2.30359  | H | 10.35209 | -0.24471 | -2.63098 |
| H | 6.824757 | -0.42062 | 2.849044 | C | -0.4029  | -6.43536 | -0.42475 |
| C | 5.755391 | -2.87622 | 0.786691 | H | -0.7386  | -6.62345 | -1.45419 |
| H | 5.830704 | -3.6041  | -0.0095  | C | -9.02076 | -3.02936 | -1.92932 |
| C | -0.57671 | 4.113998 | 1.80542  | H | -9.19568 | -3.71799 | -2.74895 |
| H | -1.14199 | 4.578554 | 2.609635 | C | 9.772785 | 1.566149 | 0.644527 |
| C | -6.05158 | -3.61334 | 1.635445 | H | 10.58505 | 1.00227  | 1.090595 |
| H | -7.11898 | -3.49236 | 1.463669 | C | 0.243835 | 0.682069 | -6.01207 |
| C | -0.63044 | 2.732396 | 1.636778 | H | -0.53628 | 1.38056  | -6.34337 |
| H | -1.22784 | 2.106931 | 2.293327 | C | -10.1046 | -2.5039  | -1.20932 |
| C | -2.56194 | 4.33838  | -1.47902 | H | -11.1187 | -2.78208 | -1.47533 |
| H | -1.93964 | 4.859001 | -0.75557 | C | 9.742231 | -2.3005  | -2.90052 |
| C | 6.770625 | -1.91261 | 1.146944 | H | 10.73281 | -2.64438 | -3.17791 |
| H | 7.732496 | -1.81064 | 0.661375 | C | -9.62831 | 3.193339 | -2.45572 |
| C | -4.22398 | 3.039559 | -3.33064 | H | -10.5969 | 3.623717 | -2.68592 |
| H | -4.90089 | 2.573693 | -4.04525 | C | 0.611638 | 7.191474 | -0.12233 |
| C | 3.587691 | 2.577072 | 1.988687 | H | 1.641031 | 7.007857 | -0.45708 |
| H | 2.885837 | 2.152401 | 1.272586 | H | 0.528118 | 8.264601 | 0.07249  |
| C | 3.679309 | -2.77161 | -4.87864 | H | -0.0718  | 6.947177 | -0.94603 |
| H | 3.79693  | -2.77504 | -5.95754 | C | 8.988682 | 3.475623 | -0.63429 |
| C | -3.74469 | -2.9524  | 1.214215 | H | 9.193897 | 4.392434 | -1.17643 |
| H | -3.02046 | -2.30084 | 0.728129 | C | 1.353561 | 6.690414 | 2.238279 |

|   |          |          |          |   |          |          |          |
|---|----------|----------|----------|---|----------|----------|----------|
| C | 4.99652  | -1.68103 | 2.642539 | H | 1.112024 | 6.197008 | 3.188174 |
| C | -4.77213 | -1.38236 | -1.69468 | H | 1.418874 | 7.766977 | 2.423437 |
| H | -3.71071 | -1.32228 | -1.43171 | H | 2.340802 | 6.341667 | 1.905153 |
| H | -4.94027 | -2.31784 | -2.23844 | C | 0.916958 | -7.18479 | -0.19375 |
| C | -7.11647 | 2.080282 | -1.87849 | H | 1.22307  | -7.14495 | 0.859674 |
| C | 0.843598 | 0.337068 | 3.324249 | H | 1.732635 | -6.787   | -0.8095  |
| H | 1.589652 | 0.944859 | 2.821512 | H | 0.791332 | -8.24181 | -0.44673 |
| C | -4.88766 | 2.153049 | 2.354818 | C | 0.014696 | -0.67226 | -6.71082 |
| H | -3.97328 | 2.701035 | 2.54265  | H | 0.793224 | -1.39485 | -6.42783 |
| C | 4.336561 | -1.93544 | -2.69188 | H | 0.060146 | -0.54582 | -7.79699 |
| C | 5.86825  | 2.929194 | 2.769208 | H | -0.96073 | -1.10277 | -6.4591  |
| H | 6.941804 | 2.798201 | 2.650728 | C | 1.615304 | 1.26096  | -6.40848 |
| C | -1.05386 | -1.23892 | 4.524732 | H | 1.807112 | 2.225632 | -5.9256  |
| H | -1.83015 | -1.87266 | 4.943874 | H | 1.659671 | 1.409506 | -7.49187 |
| C | 5.379773 | 3.679132 | 3.848239 | H | 2.42629  | 0.568892 | -6.13849 |
| H | 6.073997 | 4.110658 | 4.561292 | C | -1.40467 | -1.19025 | 7.473639 |
| C | 3.107095 | 3.33813  | 3.062285 | H | -1.70713 | -2.20155 | 7.170746 |
| H | 2.036889 | 3.513943 | 3.164986 | H | -2.20373 | -0.48847 | 7.204517 |
| C | 8.45208  | 1.121654 | 0.792681 | H | -1.32148 | -1.19763 | 8.564301 |
| H | 8.269274 | 0.209161 | 1.349507 | C | 1.006031 | -1.87589 | 7.166818 |
| C | 3.428762 | -2.8129  | -2.07943 | H | 1.089714 | -2.01538 | 8.248827 |
| H | 3.334485 | -2.82979 | -0.99367 | H | 1.995082 | -1.59571 | 6.782706 |
| C | -4.38389 | 0.101739 | 3.89777  | H | 0.718942 | -2.83833 | 6.722794 |
| H | -4.48494 | -0.97713 | 3.719127 |   |          |          |          |

**Table S15.** Optimized Cartesian Coordinates of  $3^{4+}$ .

|    |          |          |          |   |          |          |          |
|----|----------|----------|----------|---|----------|----------|----------|
| Ru | -0.00997 | 0.008694 | 0.756074 | C | 4.748078 | 0.306005 | 3.8493   |
| Fe | 5.134076 | -0.53573 | 0.646437 | H | 5.058472 | -0.02428 | 4.848818 |
| Fe | -5.16074 | 0.503752 | 0.693885 | H | 3.671891 | 0.111023 | 3.761111 |
| P  | -5.37107 | -1.43575 | -0.55877 | H | 4.920702 | 1.385682 | 3.793876 |
| P  | -5.17832 | 1.558112 | -1.39335 | C | 1.098173 | 2.270204 | 4.357736 |
| P  | 5.132193 | -1.59474 | -1.43753 | H | 1.74686  | 2.056935 | 5.201742 |
| P  | 5.346455 | 1.399505 | -0.61387 | C | -9.51416 | -3.00301 | -2.04471 |
| N  | 3.207292 | -0.33368 | 0.678511 | H | -10.4763 | -3.37798 | -2.37654 |
| N  | -0.16814 | -1.47524 | 2.263624 | C | 1.381044 | 5.684274 | 4.827258 |
| N  | 0.168031 | 1.497854 | 2.260006 | H | 1.383973 | 6.519829 | 5.533653 |
| N  | -3.23211 | 0.317952 | 0.715294 | H | 1.056384 | 6.065521 | 3.850558 |
| N  | 0.16453  | 1.502683 | -0.73902 | H | 2.414954 | 5.320738 | 4.740775 |
| C  | -2.04032 | 0.220755 | 0.74589  | C | -4.75219 | -0.32899 | 3.894477 |
| N  | -0.20201 | -1.48849 | -0.73265 | H | -4.92553 | -1.40895 | 3.84735  |
| C  | 6.631238 | 0.063743 | 2.061072 | H | -5.05208 | 0.007107 | 4.895256 |
| H  | 7.063328 | 1.050264 | 2.171788 | H | -3.67688 | -0.13503 | 3.79371  |
| C  | -3.96128 | 2.960948 | -1.57017 | C | -7.03659 | 3.668191 | -1.71798 |
| C  | 2.017754 | -0.21549 | 0.721322 | H | -6.30406 | 4.285178 | -1.20001 |
| C  | -5.5361  | 0.403082 | 2.860284 | C | -8.59733 | -2.49865 | -2.97716 |

|   |          |          |          |   |          |          |          |
|---|----------|----------|----------|---|----------|----------|----------|
| C | -4.67207 | 0.274422 | -2.71082 | H | -8.84491 | -2.49388 | -4.0336  |
| H | -5.49803 | 0.199229 | -3.42689 | C | 0.943177 | 4.068508 | 6.713643 |
| H | -3.81415 | 0.692057 | -3.25058 | H | 1.995767 | 3.757017 | 6.675507 |
| C | 3.909918 | -2.99448 | -1.59966 | H | 0.344149 | 3.232907 | 7.093266 |
| C | -6.64775 | -0.10054 | 2.117393 | H | 0.880446 | 4.881768 | 7.442563 |
| H | -7.07394 | -1.08909 | 2.232565 | C | 0.351267 | -2.42866 | -2.88564 |
| C | -8.46281 | 0.926983 | 0.524825 | H | 0.969788 | -2.38197 | -3.77884 |
| H | -8.57674 | 1.81496  | -0.10328 | C | 0.548869 | -1.49812 | -1.87005 |
| H | -9.30143 | 0.915854 | 1.232165 | H | 1.308868 | -0.72674 | -1.9513  |
| H | -8.56189 | 0.037213 | -0.10925 | C | -9.19255 | 3.472829 | -2.8237  |
| C | 4.617956 | -0.31257 | -2.75333 | H | -10.1277 | 3.920508 | -3.14213 |
| H | 5.437631 | -0.24113 | -3.47696 | C | -3.05276 | 4.754425 | -2.93762 |
| H | 3.753807 | -0.72873 | -3.28424 | H | -3.02329 | 5.294783 | -3.87853 |
| C | 8.431811 | -0.97715 | 0.461156 | C | -0.59549 | 1.509668 | -1.87027 |
| H | 8.534299 | -0.08627 | -0.17074 | H | -1.35745 | 0.739562 | -1.94374 |
| H | 8.534986 | -1.8641  | -0.17026 | C | -3.4174  | -4.07853 | 1.987572 |
| H | 9.274451 | -0.97505 | 1.163794 | H | -2.87401 | -4.02385 | 2.928638 |
| C | 7.151309 | -0.99434 | 1.224702 | C | -0.63376 | -3.43007 | -2.75999 |
| C | -1.13601 | -2.46533 | -0.59151 | C | -0.36335 | -3.45523 | 4.293848 |
| H | -1.71288 | -2.4545  | 0.327003 | C | 7.301048 | 1.976963 | -2.63068 |
| C | 6.710387 | -2.35846 | -2.06759 | H | 6.584433 | 1.624528 | -3.37033 |
| C | 0.528768 | -2.64257 | 2.18053  | C | -0.966   | -1.29885 | 3.35104  |
| H | 1.145016 | -2.76302 | 1.294515 | H | -1.49982 | -0.35413 | 3.397676 |
| C | -6.76288 | 2.317936 | -2.01273 | C | 0.365697 | 3.471109 | 4.299075 |
| C | 7.918402 | 2.513041 | -0.34136 | C | -7.71304 | 1.549601 | -2.70595 |
| H | 7.670647 | 2.583717 | 0.71633  | H | -7.54167 | 0.497099 | -2.91994 |
| C | -7.02001 | -2.02988 | -1.18434 | C | -8.92102 | 2.128816 | -3.11616 |
| C | -7.17818 | 0.952569 | 1.28133  | H | -9.64737 | 1.532689 | -3.65853 |
| C | -3.93301 | -2.90691 | 1.414233 | C | 0.581117 | 3.438539 | -2.77499 |
| H | -3.7664  | -1.9445  | 1.895397 | C | -0.88779 | -4.39458 | -3.89614 |
| C | -4.6516  | -2.97482 | 0.210391 | H | 0.091871 | -4.69603 | -4.29891 |
| C | -7.35151 | -2.01526 | -2.55029 | C | 6.29228  | -2.14167 | 1.447877 |
| H | -6.64668 | -1.65778 | -3.2988  | H | 6.428581 | -3.11725 | 0.995545 |
| C | -1.37048 | -3.43699 | -1.56319 | C | -2.35124 | 4.512915 | -0.62396 |
| H | -2.13263 | -4.18628 | -1.37035 | H | -1.76745 | 4.86867  | 0.222182 |
| C | 1.327659 | 3.448209 | -1.58432 | C | 4.325485 | 5.35046  | 0.124726 |
| H | 2.091743 | 4.197435 | -1.39917 | H | 4.502431 | 6.31296  | -0.34435 |
| C | -8.24851 | 4.240641 | -2.12382 | C | 8.542276 | 2.457595 | -3.07354 |
| H | -8.45252 | 5.283146 | -1.90381 | H | 8.774557 | 2.456137 | -4.13345 |
| C | -5.32672 | 1.77793  | 2.467594 | C | -9.17542 | -3.04504 | -0.68288 |
| C | 3.139808 | -3.41836 | -0.50724 | H | -9.87204 | -3.46057 | 0.037321 |
| H | 3.209535 | -2.8809  | 0.436686 | C | 2.296792 | -4.53231 | -0.63573 |
| C | 6.989495 | 1.987274 | -1.25993 | H | 1.714786 | -4.87925 | 0.215324 |
| C | -4.28398 | 2.684102 | 3.028352 | C | -3.6179  | -5.31698 | 1.360289 |



|   |          |          |          |   |          |          |          |
|---|----------|----------|----------|---|----------|----------|----------|
| H | -3.30144 | 2.193936 | 3.068004 | H | -3.23767 | -6.2265  | 1.813895 |
| H | -4.5479  | 2.971586 | 4.053936 | C | -0.40494 | 2.436977 | -2.89027 |
| H | -4.19662 | 3.607152 | 2.444851 | H | -1.02978 | 2.387672 | -3.77887 |
| C | -3.18831 | 3.395808 | -0.48413 | C | 0.977505 | 1.324156 | 3.339149 |
| H | -3.2511  | 2.86462  | 0.463717 | H | 1.516248 | 0.38198  | 3.37914  |
| C | 4.637228 | 2.939095 | 0.162968 | C | 3.603385 | 5.274536 | 1.326954 |
| C | -3.88981 | 3.64013  | -2.80186 | H | 3.222929 | 6.18092  | 1.787578 |
| H | -4.51482 | 3.332556 | -3.63878 | C | 3.400557 | 4.031803 | 1.944495 |
| C | 5.302151 | -1.80679 | 2.423361 | H | 2.851996 | 3.969627 | 2.882521 |
| C | 2.22402  | -5.22256 | -1.85303 | C | -1.64393 | -4.47281 | 6.254384 |
| H | 1.597138 | -6.1047  | -1.94254 | H | -1.67826 | -3.56869 | 6.876395 |
| C | 4.846007 | 4.186041 | -0.45652 | H | -1.64215 | -5.32682 | 6.937938 |
| H | 5.43424  | 4.257151 | -1.37001 | H | -2.56522 | -4.5241  | 5.660321 |
| C | -0.53732 | 2.661077 | 2.187999 | C | 9.132397 | -3.51763 | -2.89486 |
| H | -1.16771 | 2.777635 | 1.311416 | H | 10.06456 | -3.96701 | -3.21966 |
| C | 3.917631 | 2.864477 | 1.365473 | C | 8.191834 | -4.28371 | -2.18846 |
| H | 3.749727 | 1.899546 | 1.840435 | H | 8.395538 | -5.32654 | -1.96971 |
| C | 5.521234 | -0.4322  | 2.811444 | C | -1.08629 | -2.24904 | 4.364935 |
| C | -4.32454 | -1.08464 | -2.09298 | H | -1.73971 | -2.04268 | 5.207061 |
| H | -3.28614 | -1.10559 | -1.73642 | C | -0.38449 | -4.50277 | 5.383062 |
| H | -4.44069 | -1.90413 | -2.81489 | H | -0.31138 | -5.48752 | 4.898393 |
| C | 6.983693 | -3.7091  | -1.77439 | C | 8.86131  | -2.17312 | -3.1856  |
| H | 6.253688 | -4.32463 | -1.2512  | H | 9.585015 | -1.57833 | -3.73296 |
| C | -0.46007 | 3.645503 | 3.169083 | C | 2.986396 | -4.79229 | -2.95102 |
| H | -1.05393 | 4.551151 | 3.065397 | H | 2.949982 | -5.33863 | -3.88822 |
| C | 3.829031 | -3.68084 | -2.82669 | C | 9.474353 | 2.954806 | -2.15239 |
| H | 4.45077  | -3.38108 | -3.66885 | H | 10.43288 | 3.327766 | -2.49665 |
| C | -4.85876 | -4.21797 | -0.41723 | C | 0.826571 | 4.400053 | -3.91541 |
| H | -5.44691 | -4.2838  | -1.3312  | H | -0.15556 | 4.689936 | -4.32052 |
| C | 0.454858 | -3.62971 | 3.158924 | C | -1.64803 | -3.65092 | -5.01724 |
| H | 1.036986 | -4.54158 | 3.044195 | H | -2.63061 | -3.32211 | -4.64968 |
| C | -7.93333 | -2.5636  | -0.25475 | H | -1.81277 | -4.31802 | -5.86903 |
| H | -7.66984 | -2.63875 | 0.798823 | H | -1.09997 | -2.77126 | -5.37426 |
| C | 4.257967 | -2.70581 | 2.993588 | C | 9.155931 | 2.991804 | -0.78553 |
| H | 3.278266 | -2.2102  | 3.039288 | H | 9.864751 | 3.401246 | -0.07381 |
| H | 4.527636 | -2.99198 | 4.018215 | C | -1.66173 | -5.6496  | -3.48285 |
| H | 4.161061 | -3.62992 | 2.413191 | H | -1.19003 | -6.1736  | -2.64229 |
| C | -4.33734 | -5.38549 | 0.156226 | H | -1.72087 | -6.34706 | -4.32369 |
| H | -4.51206 | -6.34502 | -0.31967 | H | -2.69465 | -5.40026 | -3.19859 |
| C | -6.32418 | 2.105069 | 1.497118 | C | 1.587884 | 5.664588 | -3.50729 |
| H | -6.46845 | 3.078874 | 1.043466 | H | 1.110432 | 6.187307 | -2.66925 |
| C | 1.100317 | 2.479202 | -0.60838 | H | 1.640276 | 6.35895  | -4.35114 |
| H | 1.684684 | 2.469811 | 0.305211 | H | 2.623125 | 5.42736  | -3.22139 |
| C | 4.280376 | 1.048473 | -2.1345  | C | 0.874599 | -4.31728 | 6.261945 |

|   |          |          |          |   |          |          |          |
|---|----------|----------|----------|---|----------|----------|----------|
| H | 3.24687  | 1.071642 | -1.76412 | H | 1.798476 | -4.38802 | 5.674281 |
| H | 4.388773 | 1.866312 | -2.85935 | H | 0.906106 | -5.08787 | 7.038094 |
| C | 7.65718  | -1.59175 | -2.76729 | H | 0.850962 | -3.33808 | 6.757973 |
| H | 7.486089 | -0.53889 | -2.98002 | C | 1.595317 | 3.657872 | -5.03165 |
| C | -2.28702 | 5.195185 | -1.84618 | H | 2.580577 | 3.340759 | -4.66089 |
| H | -1.6643  | 6.079329 | -1.94452 | H | 1.754658 | 4.321915 | -5.88686 |
| C | 0.457246 | 4.558643 | 5.346487 | H | 1.056058 | 2.770992 | -5.38429 |
| H | -0.54991 | 4.985232 | 5.46222  |   |          |          |          |

**Table S16.** Optimized Cartesian Coordinates of 4<sup>4+</sup>.

|    |          |          |          |   |          |          |          |
|----|----------|----------|----------|---|----------|----------|----------|
| Ru | 0.031106 | -0.31116 | 0.253305 | H | -4.42392 | 2.180599 | -2.11213 |
| Fe | 4.978613 | -0.20585 | -1.30988 | C | -3.48235 | 2.941838 | 1.578221 |
| Fe | -5.06436 | -0.3692  | 1.159784 | H | -3.38515 | 1.987951 | 2.095771 |
| P  | 5.391191 | 1.90397  | -0.35987 | C | -7.22367 | 2.403257 | 0.026102 |
| P  | 5.792255 | -0.96425 | 0.744405 | C | -1.6033  | 3.798912 | -4.46531 |
| P  | -5.51281 | 1.65851  | 0.03897  | H | -1.22064 | 3.412972 | -5.41973 |
| P  | -5.36758 | -1.27899 | -0.97683 | C | 6.856682 | 3.851161 | -1.80416 |
| N  | -0.12499 | -1.94406 | -1.11338 | H | 5.919963 | 4.055654 | -2.31999 |
| N  | 3.169902 | -0.2297  | -0.60058 | C | 8.007253 | 4.562968 | -2.16616 |
| N  | 0.253423 | 1.277108 | 1.647861 | H | 7.958236 | 5.297336 | -2.96316 |
| N  | -0.3855  | 1.082992 | -1.28966 | C | 9.272148 | 3.40324  | -0.44852 |
| N  | 0.338786 | -1.68074 | 1.855436 | H | 10.20153 | 3.237473 | 0.086724 |
| N  | -3.14851 | -0.33254 | 0.827301 | C | 9.934716 | -0.55112 | 0.690405 |
| C  | 5.068607 | -2.00856 | -2.47891 | H | 10.70666 | -0.31182 | -0.03427 |
| C  | 1.385762 | 3.274773 | 2.400122 | C | -4.5085  | 0.007856 | -2.06091 |
| H  | 2.101358 | 4.060217 | 2.170319 | H | -3.45646 | -0.0008  | -1.75202 |
| C  | 4.020346 | 3.130274 | -0.67972 | H | -4.55918 | -0.28278 | -3.11786 |
| C  | -1.58752 | 3.042968 | -2.03295 | C | 3.061018 | 5.333085 | -0.28522 |
| H  | -2.22285 | 3.879631 | -1.75221 | H | 3.093703 | 6.294261 | 0.217703 |
| C  | 6.412367 | -1.54804 | -2.27488 | C | -6.9405  | -0.60425 | 2.204069 |
| H  | 7.198972 | -2.12281 | -1.7978  | C | -2.67219 | 4.027818 | 1.94197  |
| C  | 0.769035 | -2.97406 | -1.06121 | H | -1.96719 | 3.92309  | 2.763166 |
| H  | 1.505404 | -2.93482 | -0.26399 | C | 1.337401 | 3.656496 | 6.065527 |
| C  | 1.132494 | 2.294776 | 1.438323 | H | 0.483248 | 3.102808 | 6.476256 |
| H  | 1.643295 | 2.310016 | 0.479041 | H | 1.590528 | 4.439601 | 6.786799 |
| C  | 1.373452 | -2.28072 | 3.960638 | H | 2.190277 | 2.972487 | 5.995052 |
| H  | 2.091121 | -2.02002 | 4.731405 | C | 7.842765 | 0.499163 | -3.07886 |
| C  | -1.06144 | -1.98769 | -2.09785 | H | 8.713471 | -0.0926  | -2.78232 |
| H  | -1.78068 | -1.17575 | -2.11215 | H | 7.876378 | 1.459233 | -2.5487  |
| C  | 6.16491  | -3.73139 | 1.247681 | H | 7.957725 | 0.722617 | -4.14681 |
| H  | 7.227075 | -3.53907 | 1.112501 | C | -3.7065  | 5.386462 | 0.21315  |
| C  | 2.031416 | -0.2462  | -0.23507 | H | -3.81212 | 6.336956 | -0.29998 |
| C  | 4.370221 | -0.9719  | -3.20174 | C | -7.04547 | -1.50275 | -1.75813 |
| C  | 0.761685 | -4.02043 | -1.97664 | C | -4.53705 | -2.92391 | -1.2816  |
| H  | 1.493921 | -4.81852 | -1.87304 | C | 9.278497 | -1.13492 | 2.956012 |

|   |          |          |          |   |          |          |          |
|---|----------|----------|----------|---|----------|----------|----------|
| C | -0.41299 | 1.261064 | 2.838223 | H | 9.545751 | -1.35115 | 3.984835 |
| H | -1.11986 | 0.449725 | 2.97738  | C | -2.78165 | 5.248351 | 1.261656 |
| C | 1.219841 | -1.43463 | 2.863118 | H | -2.16947 | 6.094409 | 1.557969 |
| H | 1.802744 | -0.52253 | 2.778084 | C | -3.57657 | -3.40697 | -0.3771  |
| C | 5.72665  | -5.03901 | 1.500581 | H | -3.29038 | -2.79673 | 0.476127 |
| H | 6.448259 | -5.84719 | 1.554549 | C | -7.36715 | -0.92952 | -3.00245 |
| C | -0.30288 | -3.70357 | 3.01371  | H | -6.65317 | -0.31297 | -3.54345 |
| H | -0.92819 | -4.59378 | 3.033167 | C | -8.22225 | 1.830134 | -0.78337 |
| C | -1.18449 | 2.157177 | -1.03757 | H | -8.01174 | 0.968256 | -1.41432 |
| H | -1.50503 | 2.293418 | -0.00999 | C | -7.54047 | 3.498188 | 0.85256  |
| C | -4.40644 | 3.077141 | 0.532151 | H | -6.78138 | 3.965174 | 1.476491 |
| C | -0.33129 | 1.75405  | -3.61158 | C | 10.27938 | -0.82198 | 2.021015 |
| H | 0.029867 | 1.553516 | -4.61672 | H | 11.319   | -0.79631 | 2.32957  |
| C | -1.17744 | 2.851581 | -3.36748 | C | -6.29192 | -1.88759 | 2.083152 |
| C | 3.027861 | 2.87094  | -1.63608 | H | -6.70534 | -2.76704 | 1.605704 |
| H | 3.009391 | 1.914753 | -2.15704 | C | -3.13663 | 3.889608 | -4.55925 |
| C | 5.233057 | -2.67926 | 1.184061 | H | -3.56209 | 4.331192 | -3.6462  |
| C | -1.96876 | -0.35313 | 0.631102 | H | -3.59219 | 2.904479 | -4.71866 |
| C | 0.602026 | -3.45317 | 4.065731 | H | -3.42395 | 4.533604 | -5.39609 |
| C | 5.283963 | 0.127069 | -3.41518 | C | -9.8357  | 3.443199 | 0.050179 |
| C | 0.734673 | 3.24393  | 3.646171 | H | -10.8419 | 3.848308 | 0.056653 |
| C | -0.19553 | 2.202245 | 3.840215 | C | -9.52099 | 2.352843 | -0.77436 |
| H | -0.74475 | 2.115184 | 4.773899 | H | -10.2832 | 1.909601 | -1.4071  |
| C | -0.41094 | -2.81559 | 1.946782 | C | -0.23033 | 5.217568 | 4.84307  |
| H | -1.10313 | -2.9924  | 1.129118 | H | -0.47594 | 5.710495 | 3.89392  |
| C | -1.10713 | -2.99507 | -3.06303 | H | -0.02856 | 5.996749 | 5.584481 |
| H | -1.87843 | -2.95678 | -3.82547 | H | -1.11068 | 4.656624 | 5.186465 |
| C | 3.433609 | -4.24948 | 1.630832 | C | -0.09901 | -5.13916 | -4.0756  |
| H | 2.374757 | -4.4484  | 1.792955 | H | 0.010523 | -6.09539 | -3.54119 |
| C | 4.039576 | 4.368987 | -0.00916 | C | 1.720329 | -5.56128 | 4.749082 |
| H | 4.837646 | 4.60108  | 0.694512 | H | 1.367783 | -6.07185 | 3.843508 |
| C | 0.046735 | 0.90918  | -2.56646 | H | 1.819922 | -6.30862 | 5.542242 |
| H | 0.693252 | 0.056108 | -2.73973 | H | 2.716843 | -5.14231 | 4.550535 |
| C | 4.51883  | -3.34518 | -2.11494 | C | -5.05067 | -1.85673 | 2.783778 |
| H | 5.117846 | -3.83386 | -1.339   | C | -4.88709 | -0.52718 | 3.320956 |
| H | 4.514107 | -4.00355 | -2.99392 | C | 1.174861 | -4.92761 | -4.9261  |
| H | 3.487166 | -3.26683 | -1.75035 | H | 1.275342 | -5.7339  | -5.65905 |
| C | -4.51833 | 4.304367 | -0.15096 | H | 2.084475 | -4.91317 | -4.31228 |
| H | -5.25574 | 4.428803 | -0.94289 | H | 1.107699 | -3.97867 | -5.4754  |
| C | 2.978605 | -1.08583 | -3.72319 | C | -6.05367 | 0.243713 | 2.989301 |
| H | 2.56949  | -0.10603 | -3.99705 | C | -8.62576 | -1.15428 | -3.57823 |
| H | 2.312193 | -1.5648  | -2.99193 | H | -8.86524 | -0.71162 | -4.53938 |
| H | 2.971227 | -1.70757 | -4.62803 | C | -3.00531 | -4.67167 | -0.56725 |
| C | 0.993499 | 4.289138 | 4.706325 | H | -2.28459 | -5.05919 | 0.149959 |

|   |          |          |          |   |          |          |          |
|---|----------|----------|----------|---|----------|----------|----------|
| H | 1.847862 | 4.89756  | 4.379549 | C | -8.84348 | 4.014131 | 0.86111  |
| C | 2.053863 | 3.839943 | -1.91365 | H | -9.08084 | 4.863601 | 1.492836 |
| H | 1.295242 | 3.638433 | -2.66565 | C | -4.11856 | -2.99931 | 2.996463 |
| C | 0.751475 | -4.4431  | 5.197833 | H | -4.20805 | -3.35957 | 4.029552 |
| H | -0.23287 | -4.90172 | 5.370569 | H | -3.0719  | -2.70371 | 2.846016 |
| C | 7.58863  | -0.90303 | 1.221882 | H | -4.35117 | -3.83913 | 2.334312 |
| C | 3.865527 | -2.94299 | 1.369178 | C | -0.99792 | 5.197321 | -4.23165 |
| H | 3.137575 | -2.13657 | 1.304723 | H | -1.30214 | 5.87747  | -5.03331 |
| C | 8.590426 | -0.58986 | 0.292031 | H | 0.098453 | 5.170894 | -4.21434 |
| H | 8.329576 | -0.35583 | -0.73571 | H | -1.35152 | 5.623163 | -3.28223 |
| C | 8.124732 | 2.686069 | -0.08379 | C | -7.9849  | -2.33263 | -1.11931 |
| H | 8.199054 | 1.962017 | 0.725178 | H | -7.7363  | -2.83166 | -0.18525 |
| C | 4.361887 | -5.30032 | 1.692976 | C | -3.74801 | -0.08587 | 4.175824 |
| H | 4.02806  | -6.31278 | 1.897868 | H | -3.96324 | -0.30503 | 5.229774 |
| C | 5.045308 | 1.35922  | -4.22397 | H | -3.57166 | 0.994093 | 4.101938 |
| H | 5.335832 | 1.187126 | -5.26868 | H | -2.82456 | -0.6183  | 3.912929 |
| H | 5.645956 | 2.199907 | -3.85714 | C | -9.56844 | -1.95811 | -2.92152 |
| H | 3.993157 | 1.665106 | -4.22519 | H | -10.5409 | -2.13231 | -3.36927 |
| C | 4.995637 | 0.260662 | 1.940662 | C | -1.32259 | -5.22133 | -4.99074 |
| H | 3.909974 | 0.141769 | 1.864003 | H | -1.40319 | -4.32892 | -5.62603 |
| H | 5.31171  | 0.031048 | 2.964482 | H | -2.25658 | -5.33319 | -4.42607 |
| C | 6.911479 | 2.905671 | -0.76035 | H | -1.22963 | -6.08251 | -5.65903 |
| C | 6.568353 | -0.25026 | -2.8667  | C | -8.34375 | -0.28956 | 1.811573 |
| C | -0.17383 | -4.04586 | -3.03264 | H | -8.61553 | -0.73777 | 0.848916 |
| C | 2.064139 | 5.067675 | -1.23851 | H | -8.52716 | 0.787445 | 1.744692 |
| H | 1.316694 | 5.820878 | -1.46958 | H | -9.0317  | -0.6927  | 2.566069 |
| C | 9.21776  | 4.337737 | -1.49271 | C | -6.37438 | 1.598919 | 3.525182 |
| H | 10.10604 | 4.894415 | -1.77122 | H | -6.70165 | 1.512284 | 4.569248 |
| C | 5.428159 | 1.67323  | 1.534047 | H | -7.18913 | 2.073879 | 2.971279 |
| H | 6.448497 | 1.879094 | 1.87712  | H | -5.50882 | 2.27234  | 3.510707 |
| H | 4.769381 | 2.427934 | 1.977527 | C | -3.38088 | -5.4536  | -1.66901 |
| C | 7.936977 | -1.17946 | 2.560232 | H | -2.95567 | -6.44329 | -1.80722 |
| H | 7.175231 | -1.45034 | 3.289723 | C | -4.91525 | -3.7084  | -2.3866  |
| C | 1.241102 | -3.81758 | 6.508287 | C | -9.24173 | -2.55647 | -1.69493 |
| H | 2.285702 | -3.48891 | 6.428393 | H | -9.95802 | -3.20122 | -1.19691 |
| H | 1.204316 | -4.5615  | 7.309525 | C | -4.3312  | -4.96787 | -2.58017 |
| H | 0.627633 | -2.96294 | 6.815768 | H | -4.64185 | -5.58048 | -3.42074 |
| C | -5.11961 | 1.388126 | -1.81064 | H | -5.68195 | -3.36119 | -3.07623 |
| H | -6.05368 | 1.531454 | -2.36534 |   |          |          |          |

**Table S17.** Optimized Cartesian Coordinates of  $5^{4+}$ .

|    |          |          |          |    |          |          |          |
|----|----------|----------|----------|----|----------|----------|----------|
| Ru | -0.03053 | -0.03707 | 0.239475 | Fe | 5.099241 | 0.01231  | 1.00317  |
| Fe | -4.9929  | 0.002978 | -1.19676 | P  | 5.392401 | 1.652776 | -0.65929 |
| P  | -5.50947 | -1.64055 | 0.384905 | P  | 5.659812 | -1.44475 | -0.76611 |
| P  | -5.97622 | 1.461051 | 0.419117 | N  | 0.140729 | -1.76404 | -1.02083 |

|   |          |          |          |   |          |          |          |
|---|----------|----------|----------|---|----------|----------|----------|
| N | -0.2525  | 1.613664 | 1.599163 | N | 3.196896 | -0.02216 | 0.578644 |
| N | -3.20495 | -0.00519 | -0.41606 | N | 0.129612 | 1.383487 | -1.37332 |
| N | -0.15032 | -1.40555 | 1.868141 | C | 6.359686 | 1.180602 | 2.454463 |
| C | -5.89431 | -1.09424 | -2.94424 | C | 2.006095 | -0.02529 | 0.461057 |
| C | -2.04984 | -0.03488 | -0.10709 | C | -0.23713 | 3.606981 | -2.25135 |
| C | 0.619252 | -3.42048 | 2.957383 | H | -0.65667 | 4.598455 | -2.09893 |
| H | 1.257333 | -4.30093 | 2.922861 | C | 0.469818 | 3.323679 | -3.43249 |
| C | -0.19963 | -3.19634 | 4.080503 | C | -0.88515 | -2.66009 | -1.0527  |
| C | 0.817919 | 2.363738 | 1.9836   | H | -1.76426 | -2.41635 | -0.46588 |
| H | 1.783906 | 2.06811  | 1.591141 | C | 0.295796 | -4.16629 | -2.54882 |
| C | -0.54386 | 3.875741 | 3.315943 | C | 0.776212 | 1.088332 | -2.53492 |
| C | -0.94752 | -1.18275 | 2.946612 | H | 1.14291  | 0.076037 | -2.64209 |
| H | -1.55466 | -0.28606 | 2.924095 | C | 7.044816 | 2.152229 | -1.35817 |
| C | -7.24574 | -2.27981 | 0.596263 | C | -0.38935 | 2.635771 | -1.2602  |
| C | 0.621264 | -2.52715 | 1.888715 | H | -0.93058 | 2.85878  | -0.34551 |
| H | 1.247431 | -2.69888 | 1.019004 | C | 1.359637 | -3.24666 | -2.50029 |
| C | -1.64196 | 3.082616 | 2.939703 | H | 2.281331 | -3.44311 | -3.04262 |
| H | -2.64357 | 3.327119 | 3.283512 | C | 4.512199 | 3.267389 | -0.37023 |
| C | -4.46984 | -3.1841  | 0.456292 | C | 6.892465 | -0.14741 | 2.280685 |
| C | -6.48924 | 0.209878 | -2.82457 | C | 4.565258 | 0.819219 | -2.13982 |
| C | -5.19149 | -0.74805 | 2.0199   | H | 4.648528 | 1.476508 | -3.0142  |
| H | -5.43319 | -1.42331 | 2.850112 | H | 3.505261 | 0.692857 | -1.89425 |
| H | -4.12531 | -0.49429 | 2.059116 | C | 1.260418 | -2.09231 | -1.72899 |
| C | -1.46799 | 1.99117  | 2.092999 | H | 2.110286 | -1.42289 | -1.63529 |
| H | -2.32898 | 1.419865 | 1.761437 | C | 8.242276 | 1.641206 | -0.83887 |
| C | -8.30671 | -1.67033 | -0.08938 | H | 8.22113  | 0.92929  | -0.01856 |
| H | -8.10944 | -0.84723 | -0.77141 | C | 4.99416  | 1.062164 | 2.886055 |
| C | -4.47463 | -0.92193 | -3.07173 | C | 4.695543 | -0.34262 | 3.057205 |
| C | -4.1891  | 0.50141  | -3.10205 | C | 5.861708 | -1.09427 | 2.664234 |
| C | -5.42884 | 1.20208  | -2.93233 | C | 4.644652 | -3.015   | -0.81658 |
| C | -4.92002 | 2.963457 | 0.77508  | C | 3.768504 | -3.34699 | 0.227061 |
| C | -3.83685 | 3.305975 | -0.04879 | H | 3.601534 | -2.6368  | 1.036858 |
| H | -3.52794 | 2.629649 | -0.84561 | C | 5.260063 | 4.413509 | -0.03525 |
| C | -4.80465 | -4.2611  | -0.3879  | H | 6.347149 | 4.377915 | -0.02027 |
| H | -5.66042 | -4.18633 | -1.05594 | C | 7.385306 | -2.12672 | -0.99478 |
| C | -7.67032 | 2.229529 | 0.226492 | C | 0.962127 | 2.010308 | -3.56072 |
| C | -0.99537 | -2.03555 | 4.048278 | H | 1.495155 | 1.701415 | -4.45534 |
| H | -1.65314 | -1.792   | 4.876739 | C | -0.83654 | -3.84574 | -1.78106 |
| C | 0.708801 | 3.475274 | 2.816002 | H | -1.69629 | -4.50963 | -1.7414  |
| H | 1.608407 | 4.035605 | 3.058084 | C | 3.108721 | 3.3426   | -0.41947 |
| C | -3.41151 | -3.32446 | 1.369276 | H | 2.511643 | 2.466732 | -0.67665 |
| H | -3.14975 | -2.5184  | 2.052167 | C | 7.108385 | 2.466937 | 2.367747 |
| C | -6.629   | -2.38628 | -3.07789 | H | 6.437323 | 3.315914 | 2.198474 |
| H | -5.94578 | -3.241   | -3.06058 | H | 7.617726 | 2.645119 | 3.324584 |

|   |          |          |          |   |          |          |          |
|---|----------|----------|----------|---|----------|----------|----------|
| H | -7.14597 | -2.40795 | -4.0462  | H | 7.877859 | 2.470022 | 1.590028 |
| H | -7.39414 | -2.53113 | -2.30686 | C | 5.255437 | -0.52655 | -2.39355 |
| C | -6.06185 | 0.507852 | 2.0643   | H | 4.626794 | -1.18857 | -3.00104 |
| H | -5.74804 | 1.182162 | 2.868573 | H | 6.195572 | -0.37785 | -2.93677 |
| H | -7.10874 | 0.240001 | 2.245665 | C | 8.321512 | -0.50538 | 2.028706 |
| C | -7.949   | 0.521428 | -2.86992 | H | 8.952708 | 0.383452 | 1.934046 |
| H | -8.56393 | -0.38331 | -2.84065 | H | 8.708612 | -1.08275 | 2.877996 |
| H | -8.17816 | 1.035416 | -3.81296 | H | 8.458543 | -1.13033 | 1.135849 |
| H | -8.27189 | 1.191958 | -2.06221 | C | 3.210375 | 5.692669 | 0.209536 |
| C | -3.02476 | -5.5957  | 0.588194 | H | 2.708865 | 6.6306   | 0.426001 |
| H | -2.48324 | -6.53419 | 0.654273 | C | 6.088876 | -2.5593  | 2.838755 |
| C | -5.65999 | 2.667872 | -3.09572 | H | 6.883661 | -2.92068 | 2.178024 |
| H | -6.61867 | 2.971776 | -2.66378 | H | 6.40972  | -2.7641  | 3.86869  |
| H | -5.69553 | 2.917353 | -4.16439 | H | 5.189895 | -3.15698 | 2.653272 |
| H | -4.8705  | 3.279445 | -2.64503 | C | 4.610531 | 5.620432 | 0.253412 |
| C | -4.0844  | -5.46062 | -0.32362 | H | 5.195323 | 6.50013  | 0.500646 |
| H | -4.36856 | -6.29513 | -0.95671 | C | 7.72712  | -3.33989 | -0.36205 |
| C | -7.7879  | 3.501904 | -0.36848 | H | 6.97817  | -3.91198 | 0.182621 |
| H | -6.90194 | 4.068901 | -0.6481  | C | 2.465073 | 4.555119 | -0.13167 |
| C | -2.69365 | -4.52834 | 1.434289 | H | 1.379425 | 4.609809 | -0.17282 |
| H | -1.89085 | -4.63376 | 2.160395 | C | 3.125449 | -4.59402 | 0.23167  |
| C | -3.16468 | 4.521471 | 0.150943 | H | 2.470197 | -4.8678  | 1.054785 |
| H | -2.35111 | 4.806643 | -0.51185 | C | 0.713556 | 4.368556 | -4.49416 |
| C | -0.16046 | -4.12961 | 5.267    | H | 0.196084 | 5.289487 | -4.19283 |
| H | 0.148392 | -5.12085 | 4.904839 | C | 3.436106 | -0.90356 | 3.628146 |
| C | -2.85822 | 1.114634 | -3.37624 | H | 3.322131 | -1.96803 | 3.390273 |
| H | -2.82919 | 2.170414 | -3.08041 | H | 3.451244 | -0.81438 | 4.722103 |
| H | -2.6401  | 1.070742 | -4.45133 | H | 2.544693 | -0.37744 | 3.262471 |
| H | -2.0504  | 0.590655 | -2.84917 | C | 8.357664 | -1.44124 | -1.74314 |
| C | -8.8314  | 1.545444 | 0.630809 | H | 8.127447 | -0.50955 | -2.25444 |
| H | -8.77874 | 0.569013 | 1.106356 | C | 4.100322 | 2.207809 | 3.222997 |
| C | -3.47887 | -2.01565 | -3.25184 | H | 3.095981 | 1.862514 | 3.489152 |
| H | -2.45831 | -1.66334 | -3.06458 | H | 4.497964 | 2.762068 | 4.082884 |
| H | -3.51523 | -2.40563 | -4.27771 | H | 4.017659 | 2.919177 | 2.387065 |
| H | -3.67533 | -2.85593 | -2.57173 | C | 4.212583 | -5.17044 | -1.86165 |
| C | -4.62626 | 5.035434 | 2.020637 | H | 4.404911 | -5.88224 | -2.6581  |
| H | -4.94691 | 5.709782 | 2.807982 | C | 4.860214 | -3.92848 | -1.86702 |
| C | -5.3083  | 3.828946 | 1.816967 | H | 5.566979 | -3.69615 | -2.66201 |
| H | -6.17136 | 3.593447 | 2.437359 | C | 7.078374 | 3.044208 | -2.44967 |
| C | -7.50215 | -3.33872 | 1.488217 | H | 6.157464 | 3.463615 | -2.85305 |
| H | -6.6875  | -3.82577 | 2.021456 | C | 9.471778 | 2.021995 | -1.39622 |
| C | -9.62182 | -2.11491 | 0.106388 | H | 10.3961  | 1.62559  | -0.9869  |
| H | -10.4392 | -1.6417  | -0.43072 | C | 0.352786 | -5.39856 | -3.41829 |
| C | -0.69597 | 5.084292 | 4.207744 | H | 1.409153 | -5.60667 | -3.64252 |

|   |          |          |          |   |          |          |          |
|---|----------|----------|----------|---|----------|----------|----------|
| H | -1.77091 | 5.262682 | 4.354859 | C | 3.350916 | -5.50815 | -0.80569 |
| C | -3.56076 | 5.389181 | 1.177381 | H | 2.878984 | -6.48555 | -0.78435 |
| H | -3.06093 | 6.343525 | 1.310428 | C | 9.504836 | 2.910561 | -2.47885 |
| C | -9.87701 | -3.17111 | 0.992088 | H | 10.45512 | 3.209829 | -2.90802 |
| H | -10.8926 | -3.52159 | 1.142271 | C | 8.30611  | 3.417698 | -3.00792 |
| C | -8.81689 | -3.77925 | 1.683836 | H | 8.33181  | 4.106049 | -3.84595 |
| H | -9.01602 | -4.59557 | 2.369951 | C | 9.65893  | -1.95306 | -1.84586 |
| C | -10.0937 | 2.120888 | 0.43192  | H | 10.39807 | -1.4219  | -2.437   |
| H | -10.9823 | 1.592071 | 0.76112  | C | 9.999973 | -3.14982 | -1.20109 |
| C | -10.2082 | 3.378825 | -0.17637 | H | 11.00626 | -3.5459  | -1.2845  |
| H | -11.1858 | 3.82374  | -0.32715 | C | -0.36922 | -5.09671 | -4.74999 |
| C | -0.05672 | 4.816286 | 5.58501  | H | 0.081705 | -4.24646 | -5.27452 |
| H | -0.50048 | 3.94498  | 6.078485 | H | -0.32556 | -5.9684  | -5.41042 |
| H | -0.19428 | 5.683954 | 6.237718 | H | -1.42798 | -4.86675 | -4.5632  |
| H | 1.023126 | 4.643289 | 5.484653 | C | -0.26365 | -6.63409 | -2.74683 |
| C | -0.07619 | 6.336823 | 3.563186 | H | -1.35263 | -6.53018 | -2.644   |
| H | 1.015723 | 6.245506 | 3.490721 | H | -0.08488 | -7.52228 | -3.36052 |
| H | -0.28639 | 7.217964 | 4.177278 | H | 0.159482 | -6.81522 | -1.75108 |
| H | -0.47388 | 6.517716 | 2.556488 | C | 9.028424 | -3.84554 | -0.46489 |
| C | -9.05207 | 4.070056 | -0.56936 | H | 9.280927 | -4.78441 | 0.01659  |
| H | -9.1344  | 5.054131 | -1.01863 | C | 0.16207  | 3.925831 | -5.86111 |
| C | 0.921073 | -3.6243  | 6.248412 | H | -0.90874 | 3.696459 | -5.81387 |
| H | 1.909021 | -3.57476 | 5.773184 | H | 0.304172 | 4.723273 | -6.59694 |
| H | 0.990091 | -4.29502 | 7.110292 | H | 0.68913  | 3.038858 | -6.2357  |
| H | 0.662269 | -2.62308 | 6.618393 | C | 2.222529 | 4.673093 | -4.59042 |
| C | -1.51042 | -4.26676 | 5.981746 | H | 2.777209 | 3.786295 | -4.92727 |
| H | -1.78616 | -3.33903 | 6.499706 | H | 2.397851 | 5.469033 | -5.32086 |
| H | -1.44911 | -5.04882 | 6.744275 | H | 2.633866 | 4.994898 | -3.62565 |
| H | -2.31818 | -4.53423 | 5.289064 |   |          |          |          |
